# Supplementary material for: Metal-free radical bicyclization/chloroalkylarylation of 1,6-enynes with chloroalkanes
Source: Royal Society of Chemistry journal article supplement (doi:10.1039/d4cc00651h), 2024-01-01

## Supporting Information

### Metal-free radical bicyclization/chloroalkylation of 1,6-enynes with chloroalkanes

Hongxun Zhou,<sup>a</sup> Lijun Li,<sup>\*a</sup> Qinqin Yan,<sup>a</sup> Jinyue Ma,<sup>a</sup> Ying Wang,<sup>a</sup> Yongjun Gao,<sup>a</sup> Zhong-Quan Liu<sup>\*b</sup> and Zejiang Li<sup>\*a</sup>

<sup>a</sup>Key Laboratory of Medicinal Chemistry and Molecular Diagnosis of the Ministry of Education, State Key Laboratory of New Pharmaceutical Preparations and Excipients, College of Chemistry and Materials Science, Key Laboratory of Chemical Biology of Hebei Province (22567635H), Hebei Research Center of the Basic Discipline of Synthetic Chemistry, Hebei University, Baoding, Hebei, 071002, P. R. China. E-mail: lizejiang898@126.com, llj@hbu.edu.cn.

<sup>b</sup>Jiangsu Collaborative Innovation Center of Chinese Medicinal Resources Industrialization, College of Pharmacy, Nanjing University of Chinese Medicine, Nanjing, Jiangsu 210023, P. R. China; Email: liuzq@njucm.edu.cn.

|                                                                                 |    |
|---------------------------------------------------------------------------------|----|
| General Information.....                                                        | 2  |
| Typical procedure for the reaction.....                                         | 2  |
| Crystallographic details.....                                                   | 2  |
| Physical data for the following products.....                                   | 7  |
| Copies of the <sup>1</sup> H NMR, <sup>13</sup> C NMR, <sup>19</sup> F NMR..... | 29 |

## General Information

$^1\text{H}$  and  $^{13}\text{C}$  NMR and  $^{19}\text{F}$  NMR spectra were recorded on a Bruker advance III 400 or 600 spectrometer in  $\text{CDCl}_3$  with TMS as the internal standard. High-resolution mass spectral analysis (HRMS) data were measured on a Waters Xevo G2-XS qTOF. All products were identified by  $^1\text{H}$  and  $^{13}\text{C}$  NMR, HRMS. The raw materials were purchased from Energy, Meryer, J&K Chemicals, or Aldrich and used without further purification.

## Typical procedure for the reaction

Reaction conditions 1: A mixture of 1,6-enynes (1 equiv., 0.1 mmol), chloroform (7 mL), KI (0.1 equiv.), DTBP (3 equiv.) was added into a 15 mL sealed pipe, which was conducted at 130 °C in a heating mantle with an air atmosphere. After the bicyclization reaction was finished, the mixture was condensed under vacuum and purified by column chromatography to afford the final products.

Reaction conditions 2: A mixture of trichlorinated polycycles (1 equiv., 0.1 mmol), Pd ( $\text{PPh}_3$ )<sub>4</sub> (0.05 equiv.) or not,  $\text{Cs}_2\text{CO}_3$  (2.5 or 5 equiv.), THF (anhydrous, 1 mL) was added into a 15 mL sealed pipe, which was conducted at 120 °C in an oil bath with an  $\text{N}_2$  atmosphere. After the transformation was completed, a similar workup was operated.

## Crystallographic details

(1) First, product **1**, **32**, or **36** was solved with the mixture of 1.5 mL dichloromethane and 3 mL petroleum ether in a sample bottle, respectively, which was sealed/placed on the desk of the laboratory. Next, the crystal of the fused cycles **1**, **32**, or **36** was separately precipitated via volatilizing after several days.

(2a) A single crystal of product **1** was obtained as follows: A proper crystal was selected and detected on a “Bruker APEX2” diffractometer. The crystal stayed at 273.0 K during data collection. With the assistance of Shelxtl, the structure was solved with the XShell structure solution program using Charge Flipping, and it was refined with the SHELXL [1] refinement package using Least Squares minimisation. Finally, crystal data and structure refinement parameters of product **1** are described as

shown in **Table S1**. CCDC No. 2330699.

[1]. Sheldrick, G.M. (2015). Acta Cryst. C71, 3-8.

Table S1. Crystal data and structure refinement for product **1**.

|                                                                |                                                                |                 |
|----------------------------------------------------------------|----------------------------------------------------------------|-----------------|
| CCDC                                                           | 2330699                                                        |                 |
| Displacement ellipsoids are drawn at the 30% probability level |                                                                |                 |
| Empirical formula                                              | C <sub>20</sub> H <sub>15</sub> Cl <sub>3</sub> O <sub>2</sub> |                 |
| Formula weight                                                 | 393.67                                                         |                 |
| Temperature                                                    | 273(2) K                                                       |                 |
| Wavelength                                                     | 0.71073 Å                                                      |                 |
| Crystal system                                                 | Monoclinic                                                     |                 |
| Space group                                                    | P2 <sub>1</sub> /c                                             |                 |
| Unit cell dimensions                                           | a = 10.8147(18) Å                                              | a = 90°         |
|                                                                | b = 9.8903(15) Å                                               | b = 104.319(6)° |
|                                                                | c = 16.969(3) Å                                                | g = 90°         |
| Volume                                                         | 1758.6(5) Å <sup>3</sup>                                       |                 |
| Z                                                              | 4                                                              |                 |
| Density (calculated)                                           | 1.487 Mg/m <sup>3</sup>                                        |                 |
| Absorption coefficient                                         | 0.532 mm <sup>-1</sup>                                         |                 |
| F(000)                                                         | 808                                                            |                 |
| Crystal size                                                   | 0.390 x 0.240 x 0.190 mm <sup>3</sup>                          |                 |
| Theta range for data collection                                | 1.943 to 30.082/°                                              |                 |
| Index ranges                                                   | -15<=h<=15, -13<=k<=13, -23<=l<=23                             |                 |
| Reflections collected                                          | 47379                                                          |                 |
| Independent reflections                                        | 5146 [R(int) = 0.0578]                                         |                 |
| Completeness to theta = 25.242°                                | 99.9 %                                                         |                 |
| Refinement method                                              | Full-matrix least-squares on F <sup>2</sup>                    |                 |
| Data / restraints / parameters                                 | 5146 / 0 / 226                                                 |                 |
| Goodness-of-fit on F <sup>2</sup>                              | 1.151                                                          |                 |
| Final R indices [I>2sigma(I)]                                  | R1 = 0.0528, wR2 = 0.1236                                      |                 |
| R indices (all data)                                           | R1 = 0.0630, wR2 = 0.1314                                      |                 |
| Extinction coefficient                                         | n/a                                                            |                 |
| Largest diff. peak and hole                                    | 0.550 and -0.233 e.Å <sup>-3</sup>                             |                 |

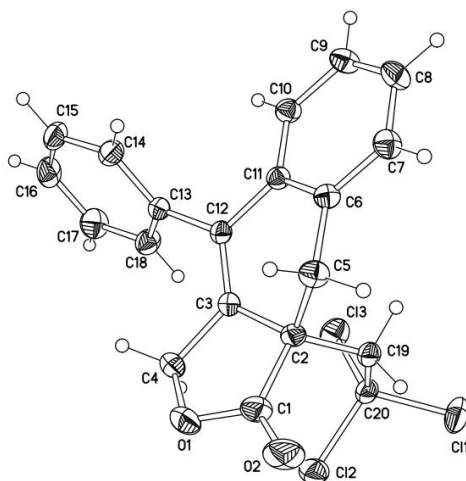

Fig. S1 Structure of product **1**.

(2b) A single crystal of product **32** was obtained via a similar operation, which was described as shown in **Table S2**. CCDC No. 2330700.

Table S2. Crystal data and structure refinement for product **32**.

|                                                                |                                                |                  |
|----------------------------------------------------------------|------------------------------------------------|------------------|
| CCDC                                                           | 2330700                                        |                  |
| Displacement ellipsoids are drawn at the 50% probability level |                                                |                  |
| Empirical formula                                              | C <sub>24</sub> H <sub>16</sub> O <sub>2</sub> |                  |
| Formula weight                                                 | 336.37                                         |                  |
| Temperature                                                    | 273(2) K                                       |                  |
| Wavelength                                                     | 0.71073 Å                                      |                  |
| Crystal system                                                 | Monoclinic                                     |                  |
| Space group                                                    | P2 <sub>1</sub> /c                             |                  |
| Unit cell dimensions                                           | a = 12.2366(11) Å                              | a = 90°.         |
|                                                                | b = 17.3994(15) Å                              | b = 102.186(4)°. |
|                                                                | c = 8.2782(8) Å                                | g = 90°.         |
| Volume                                                         | 1722.8(3) Å <sup>3</sup>                       |                  |
| Z                                                              | 4                                              |                  |
| Density (calculated)                                           | 1.297 Mg/m <sup>3</sup>                        |                  |
| Absorption coefficient                                         | 0.081 mm <sup>-1</sup>                         |                  |
| F(000)                                                         | 704                                            |                  |
| Crystal size                                                   | 0.320 x 0.210 x 0.110 mm <sup>3</sup>          |                  |
| Theta range for data collection                                | 2.776 to 23.286°.                              |                  |
| Index ranges                                                   | -13 ≤ h ≤ 13, -19 ≤ k ≤ 19, -9 ≤ l ≤ 9         |                  |
| Reflections collected                                          | 15822                                          |                  |

|                                   |                                             |
|-----------------------------------|---------------------------------------------|
| Independent reflections           | 2481 [R(int) = 0.0835]                      |
| Completeness to theta = 23.286°   | 99.5 %                                      |
| Refinement method                 | Full-matrix least-squares on F <sup>2</sup> |
| Data / restraints / parameters    | 2481 / 0 / 235                              |
| Goodness-of-fit on F <sup>2</sup> | 1.110                                       |
| Final R indices [I>2sigma(I)]     | R1 = 0.0686, wR2 = 0.1453                   |
| R indices (all data)              | R1 = 0.1004, wR2 = 0.1630                   |
| Extinction coefficient            | n/a                                         |
| Largest diff. peak and hole       | 0.208 and -0.187 e.Å <sup>-3</sup>          |

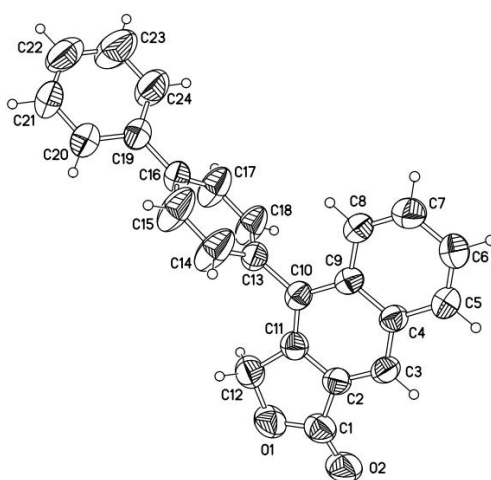

Fig. S2 Structure of product **32**.

(2c) A single crystal of product **36** was obtained via a similar operation, which was described as shown in **Table S3**. CCDC No. 2330702.

Table S3. Crystal data and structure refinement for product **36**.

|                                                                |                                                                |
|----------------------------------------------------------------|----------------------------------------------------------------|
| CCDC                                                           | 2330702                                                        |
| Displacement ellipsoids are drawn at the 50% probability level |                                                                |
| Empirical formula                                              | C <sub>38</sub> H <sub>30</sub> Cl <sub>2</sub> O <sub>2</sub> |
| Formula weight                                                 | 589.52                                                         |
| Temperature [K]                                                | 296.15                                                         |
| Crystal system                                                 | triclinic                                                      |
| Space group (number)                                           | $P\bar{1}$ (2)                                                 |
| <i>a</i> [Å]                                                   | 9.6677(8)                                                      |
| <i>b</i> [Å]                                                   | 12.9019(11)                                                    |
| <i>c</i> [Å]                                                   | 13.3368(11)                                                    |
| $\alpha$ [°]                                                   | 73.280(5)                                                      |

|                                                                 |                                                                                |
|-----------------------------------------------------------------|--------------------------------------------------------------------------------|
| $\beta$ [°]                                                     | 88.509(5)                                                                      |
| $\gamma$ [°]                                                    | 71.049(5)                                                                      |
| Volume [Å <sup>3</sup> ]                                        | 1502.7(2)                                                                      |
| <i>Z</i>                                                        | 2                                                                              |
| $\rho_{\text{calc}}$ [gcm <sup>-3</sup> ]                       | 1.303                                                                          |
| $\mu$ [mm <sup>-1</sup> ]                                       | 0.250                                                                          |
| <i>F</i> (000)                                                  | 616                                                                            |
| Crystal colour                                                  | colourless                                                                     |
| Crystal shape                                                   | block                                                                          |
| Radiation                                                       | MoK $\alpha$ ( $\lambda$ =0.71073 Å)                                           |
| 2 $\theta$ range [°]                                            | 3.20 to 53.00 (0.80 Å)                                                         |
| Index ranges                                                    | -12 ≤ <i>h</i> ≤ 12<br>-16 ≤ <i>k</i> ≤ 16<br>-16 ≤ <i>l</i> ≤ 15              |
| Reflections collected                                           | 32520                                                                          |
| Independent reflections                                         | 6150<br><i>R</i> <sub>int</sub> = 0.0550<br><i>R</i> <sub>sigma</sub> = 0.0811 |
| Completeness to<br>$\theta = 25.242^\circ$                      | 99.8 %                                                                         |
| Data / Restraints / Parameters                                  | 6150/0/382                                                                     |
| Absorption correction                                           | 0.9158/1.0000                                                                  |
| <i>T</i> <sub>min</sub> / <i>T</i> <sub>max</sub> (method)      | (numerical)                                                                    |
| Goodness-of-fit on <i>F</i> <sup>2</sup>                        | 1.008                                                                          |
| Final <i>R</i> indexes<br>[ <i>I</i> ≥ 2 $\sigma$ ( <i>I</i> )] | <i>R</i> <sub>1</sub> = 0.0552<br><i>wR</i> <sub>2</sub> = 0.1260              |
| Final <i>R</i> indexes<br>[all data]                            | <i>R</i> <sub>1</sub> = 0.1631<br><i>wR</i> <sub>2</sub> = 0.1600              |
| Largest peak/hole [eÅ <sup>-3</sup> ]                           | 0.38/-0.36                                                                     |
| Extinction coefficient                                          | 0.0051(15)                                                                     |

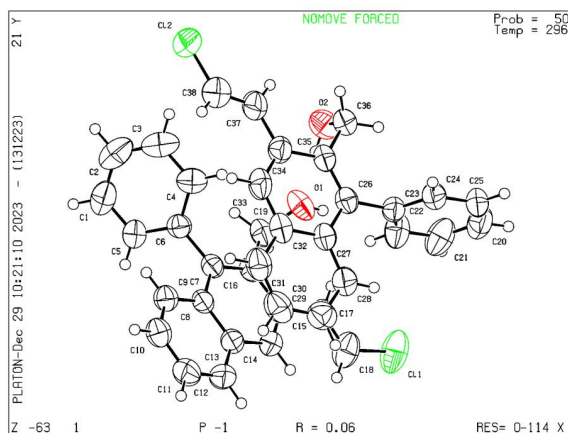

Fig. S3 Structure of product **36**.

### Physical data for the following products:

#### 1. 4-phenyl-9a-(2,2,2-trichloroethyl)-9,9a-dihydronaphtho[2,3-c]furan-1(3H)-one

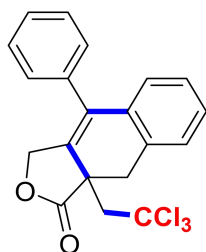

A white solid after purification by flash column chromatography (petroleum ether/ethyl acetate = 40/1). 32.3 mg, 82% yield. Mp: 189-190 °C

**<sup>1</sup>H NMR (400 MHz, CDCl<sub>3</sub>):** δ 7.46 – 7.40 (m, 3H), 7.30 – 7.28 (m, 2H), 7.25 – 7.22 (m, 1H), 7.20 – 7.17 (m, 2H), 7.04 (d, *J* = 6.8 Hz, 1H), 5.36 (d, *J* = 13.2 Hz, 1H), 4.79 (d, *J* = 13.2 Hz, 1H), 3.27 (s, 2H), 3.20 (d, *J* = 15.6 Hz, 1H), 2.86 (d, *J* = 15.2 Hz, 1H).

**<sup>13</sup>C NMR (100 MHz, CDCl<sub>3</sub>):** δ 178.6, 135.9, 135.6, 134.1, 132.2, 130.3, 129.2, 128.9, 128.8, 128.7, 128.5, 127.9, 127.2, 96.2, 71.2, 55.0, 45.6, 38.4.

**HRMS (ESI, *m/z*):** calcd for C<sub>20</sub>H<sub>16</sub>Cl<sub>3</sub>O<sub>2</sub> [M + H]<sup>+</sup>, 393.0210; Measured, 393.0221.

#### 2. 4-(*o*-tolyl)-9a-(2,2,2-trichloroethyl)-9,9a-dihydronaphtho[2,3-c]furan-1(3H)-one

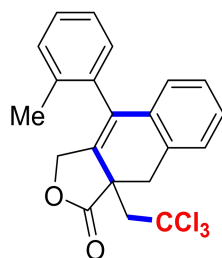

A white solid after purification by flash column chromatography (petroleum ether/ethyl acetate = 40/1). 30.2 mg, 74% yield. Mp: 208-209 °C

**<sup>1</sup>H NMR (400 MHz, CDCl<sub>3</sub>):** δ 7.35 – 7.30 (m, 1H), 7.29 – 7.23 (m, 4H), 7.18 (t, *J* = 7.6 Hz, 1H), 7.11 (d, *J* = 7.2 Hz, 1H), 6.76 (d, *J* = 7.6 Hz, 1H), 5.13 (d, *J* = 13.2 Hz, 1H), 4.59 (d, *J* = 13.6 Hz, 1H), 3.33 (d, *J* = 15.2 Hz, 1H), 3.28 (d, *J* = 15.2 Hz, 1H), 3.19 (d, *J* = 15.6 Hz, 1H), 2.91 (d, *J* = 15.6 Hz, 1H), 1.87 (s, 3H).

**<sup>13</sup>C NMR (150 MHz, CDCl<sub>3</sub>):** δ 178.6, 135.9, 135.7, 135.1, 134.1, 131.2, 131.2, 130.8, 129.4, 129.0, 128.8, 128.5, 128.2, 126.2, 126.0, 96.3, 70.8, 55.3, 45.2, 38.6, 19.7.

**HRMS (ESI, m/z):** calcd for C<sub>21</sub>H<sub>18</sub>Cl<sub>3</sub>O<sub>2</sub> [M + H]<sup>+</sup>, 407.0367; Measured, 407.0362.

3. 4-(p-tolyl)-9a-(2,2,2-trichloroethyl)-9,9a-dihydronaphtho[2,3-c]furan-1(3H)-one

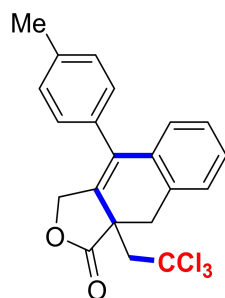

A white solid after purification by flash column chromatography (petroleum ether/ethyl acetate = 40/1). 29.8 mg, 73% yield. Mp: 206-207 °C

**<sup>1</sup>H NMR (400 MHz, CDCl<sub>3</sub>):** δ 7.28 – 7.26 (m, 2H), 7.25 – 7.21 (m, 3H), 7.07 – 7.04 (m, 3H), 5.34 (d, *J* = 13.6 Hz, 1H), 4.79 (d, *J* = 13.2 Hz, 1H), 3.26 (s, 2H), 3.18 (d, *J* = 15.2 Hz, 1H), 2.85 (d, *J* = 15.2 Hz, 1H), 2.41 (s, 3H).

**<sup>13</sup>C NMR (100 MHz, CDCl<sub>3</sub>):** δ 178.7, 138.6, 135.6, 134.3, 133.0, 132.3, 130.6, 129.8, 129.3, 128.9, 128.5, 127.9, 127.2, 96.3, 71.4, 55.1, 45.6, 38.5, 21.3.

**HRMS (ESI, m/z):** calcd for C<sub>21</sub>H<sub>21</sub>Cl<sub>3</sub>NO<sub>2</sub> [M + NH<sub>4</sub>]<sup>+</sup>, 424.0632; Measured, 424.0643.

4. 4-(4-(tert-butyl)phenyl)-9a-(2,2,2-trichloroethyl)-9,9a-dihydronaphtho[2,3-c]furan-1(3H)-one

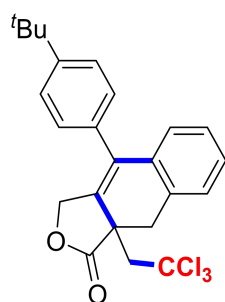

A light yellow solid after purification by flash column chromatography (petroleum ether/ethyl acetate = 40/1). 30.2 mg, 67% yield. Mp: 210-211 °C

**<sup>1</sup>H NMR (400 MHz, CDCl<sub>3</sub>):** δ 7.45 – 7.41 (m, 2H), 7.29 – 7.27 (m, 2H), 7.25 – 7.22 (m, 1H), 7.13 – 7.08 (m, 3H), 5.37 (d, *J* = 13.2 Hz, 1H), 4.83 (d, *J* = 13.6 Hz, 1H),



3.26 (s, 2H), 3.18 (d,  $J = 15.2$  Hz, 1H), 2.85 (d,  $J = 15.2$  Hz, 1H), 1.36 (s, 9H).

**$^{13}\text{C}$  NMR (100 MHz,  $\text{CDCl}_3$ ):**  $\delta$  178.8, 151.8, 135.5, 134.2, 132.9, 132.3, 130.6, 129.8, 128.9, 128.5, 127.8, 127.3, 125.5, 96.3, 71.5, 55.0, 45.7, 38.5, 34.7, 31.2.

**HRMS (ESI,  $m/z$ ):** calcd for  $\text{C}_{24}\text{H}_{23}\text{Cl}_3\text{O}_2\text{Na}$   $[\text{M} + \text{Na}]^+$ , 471.0656; Measured, 471.0664.

5. 4-(4-nitrophenyl)-9a-(2,2,2-trichloroethyl)-9,9a-dihydronaphtho[2,3-c]furan-1(3H)-one

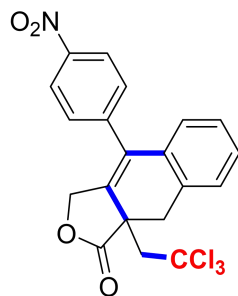

A light yellow solid after purification by flash column chromatography (petroleum ether/ethyl acetate = 20/1). 27.2 mg, 62% yield. Mp: 234-235 °C

**$^1\text{H}$  NMR (400 MHz,  $\text{CDCl}_3$ ):**  $\delta$  8.35 – 8.27 (m, 2H), 7.38 (d,  $J = 8.4$  Hz, 2H), 7.34 (d,  $J = 4.8$  Hz, 2H), 7.30 – 7.27 (m, 1H), 6.95 (d,  $J = 7.6$  Hz, 1H), 5.37 (d,  $J = 13.6$  Hz, 1H), 4.75 (d,  $J = 13.6$  Hz, 1H), 3.31 (d,  $J = 15.2$  Hz, 1H), 3.27 (d,  $J = 15.2$  Hz, 1H), 3.21 (d,  $J = 15.6$  Hz, 1H), 2.90 (d,  $J = 15.6$  Hz, 1H).

**$^{13}\text{C}$  NMR (100 MHz,  $\text{CDCl}_3$ ):**  $\delta$  177.9, 147.9, 142.9, 134.1, 133.4, 133.3, 132.2, 130.0, 129.4, 129.4, 128.4, 126.9, 124.2, 96.1, 70.7, 55.1, 45.8, 38.3.

**HRMS (ESI,  $m/z$ ):** calcd for  $\text{C}_{20}\text{H}_{14}\text{Cl}_3\text{NO}_4\text{Na}$   $[\text{M} + \text{Na}]^+$ , 459.9881; Measured, 459.9888.

6. 4-(1-oxo-9a-(2,2,2-trichloroethyl)-1,3,9,9a-tetrahydronaphtho[2,3-c]furan-4-yl)benzotrile

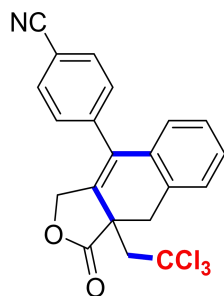

A white solid after purification by flash column chromatography (petroleum ether/ethyl acetate = 10/1). 31.4 mg, 75% yield. Mp: 211-212 °C

**<sup>1</sup>H NMR (400 MHz, CDCl<sub>3</sub>):** δ 7.78 – 7.71 (m, 2H), 7.34 – 7.31 (m, 4H), 7.29 – 7.27 (m, 1H), 6.95 (d, *J* = 7.2 Hz, 1H), 5.36 (d, *J* = 13.6 Hz, 1H), 4.75 (d, *J* = 13.6 Hz, 1H), 3.30 (d, *J* = 15.2 Hz, 1H), 3.26 (d, *J* = 14.8 Hz, 1H), 3.20 (d, *J* = 15.6 Hz, 1H), 2.89 (d, *J* = 15.2 Hz, 1H).

**<sup>13</sup>C NMR (100 MHz, CDCl<sub>3</sub>):** δ 177.9, 140.9, 134.3, 133.2, 132.9, 132.1, 129.7, 129.2, 129.2, 128.2, 126.8, 118.3, 112.5, 96.1, 70.7, 55.0, 45.7, 38.2.

**HRMS (ESI, m/z):** calcd for C<sub>21</sub>H<sub>18</sub>Cl<sub>3</sub>N<sub>2</sub>O<sub>2</sub> [M + NH<sub>4</sub>]<sup>+</sup>, 435.0428; Measured, 435.0434.

7.

9a-(2,2,2-trichloroethyl)-4-(4-(trifluoromethyl)phenyl)-9,9a-dihydronaphtho[2,3-c]furan-1(3H)-one

e

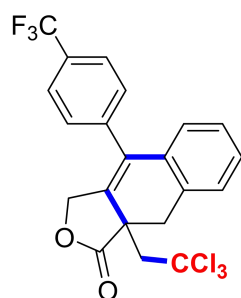

A white solid after purification by flash column chromatography (petroleum ether/ethyl acetate = 40/1). 30.9 mg, 67% yield. Mp: 235-236 °C

**<sup>1</sup>H NMR (400 MHz, CDCl<sub>3</sub>):** δ 7.74 – 7.68 (m, 2H), 7.33 – 7.31 (m, 4H), 7.28 – 7.24 (m, 1H), 6.98 (d, *J* = 7.2 Hz, 1H), 5.36 (d, *J* = 13.6 Hz, 1H), 4.76 (d, *J* = 13.2 Hz, 1H), 3.29 (s, 2H), 3.21 (d, *J* = 15.6 Hz, 1H), 2.89 (d, *J* = 15.6 Hz, 1H).

**<sup>13</sup>C NMR (100 MHz, CDCl<sub>3</sub>):** δ 178.1, 139.8, 134.5, 133.6, 132.2, 132.1, 130.7(q, *J* = 32.5 Hz), 129.4(d, *J* = 20.0 Hz), 129.1, 129.0, 128.1, 126.9, 125.7(d, *J* = 16.8 Hz), 123.8(q, *J* = 270.7 Hz), 96.1, 70.8, 55.0, 45.7, 38.3.

**<sup>19</sup>F NMR (565 MHz, CDCl<sub>3</sub>):** δ -62.69 (s, 3F).

**HRMS (ESI, m/z):** calcd for C<sub>21</sub>H<sub>18</sub>Cl<sub>3</sub>F<sub>3</sub>NO<sub>2</sub> [M + NH<sub>4</sub>]<sup>+</sup>, 478.0350; Measured, 478.0357.

8. 4-(4-acetylphenyl)-9a-(2,2,2-trichloroethyl)-9,9a-dihydronaphtho[2,3-c]furan-1(3H)-one

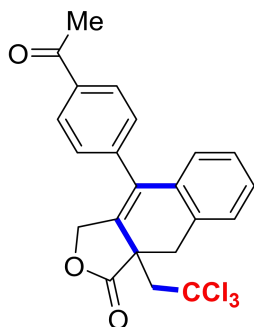

A white solid after purification by flash column chromatography (petroleum ether/ethyl acetate = 10/1). 34.8 mg, 80% yield. Mp: 203-204 °C

**<sup>1</sup>H NMR (600 MHz, CDCl<sub>3</sub>):** δ 8.09 – 7.98 (m, 2H), 7.32 – 7.29 (m, 4H), 7.27 – 7.24 (m, 1H), 6.99 (d, *J* = 7.8 Hz, 1H), 5.36 (d, *J* = 13.8 Hz, 1H), 4.76 (d, *J* = 13.2 Hz, 1H), 3.29 (d, *J* = 15.0 Hz, 1H), 3.27 (d, *J* = 15.0 Hz, 1H), 3.20 (d, *J* = 15.0 Hz, 1H), 2.89 (d, *J* = 15.6 Hz, 1H), 2.66 (s, 3H).

**<sup>13</sup>C NMR (150 MHz, CDCl<sub>3</sub>):** δ 197.3, 178.1, 140.9, 137.1, 134.9, 133.6, 132.2, 132.0, 129.4, 129.1, 128.9, 128.8, 128.1, 127.0, 96.1, 70.9, 55.1, 45.7, 38.3, 26.6.

**HRMS (ESI, *m/z*):** calcd for C<sub>22</sub>H<sub>21</sub>Cl<sub>3</sub>NO<sub>3</sub> [M + NH<sub>4</sub>]<sup>+</sup>, 452.0582; Measured, 452.0588.

9. methyl-4-(1-oxo-9a-(2,2,2-trichloroethyl)-1,3,9a-tetrahydronaphtho[2,3-c]furan-4-yl)benzoate

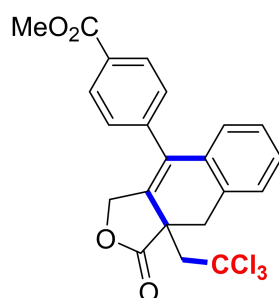

A white solid after purification by flash column chromatography (petroleum ether/ethyl acetate = 10/1). 32.6 mg, 72% yield. Mp: 177-178 °C

**<sup>1</sup>H NMR (600 MHz, CDCl<sub>3</sub>):** δ 8.16 – 8.05 (m, 2H), 7.31 – 7.30 (m, 2H), 7.27 – 7.24 (m, 3H), 6.98 (d, *J* = 7.8 Hz, 1H), 5.36 (d, *J* = 13.2 Hz, 1H), 4.75 (d, *J* = 13.8 Hz, 1H), 3.96 (s, 3H), 3.29 (d, *J* = 15.0 Hz, 1H), 3.26 (d, *J* = 15.0 Hz, 1H), 3.20 (d, *J* = 15.6 Hz, 1H), 2.88 (d, *J* = 15.6 Hz, 1H).

**<sup>13</sup>C NMR (150 MHz, CDCl<sub>3</sub>):** δ 178.2, 166.4, 140.7, 134.9, 133.7, 132.2, 131.9,

130.3, 130.1, 129.7, 129.1, 128.9, 128.1, 127.0, 96.2, 70.9, 55.1, 52.3, 45.7, 38.3.

**HRMS (ESI, m/z):** calcd for C<sub>22</sub>H<sub>21</sub>Cl<sub>3</sub>NO<sub>4</sub> [M + NH<sub>4</sub>]<sup>+</sup>, 468.0531; Measured, 468.0536.

10. 4-(4-methoxyphenyl)-9a-(2,2,2-trichloroethyl)-9,9a-dihydronaphtho[2,3-c]furan-1(3H)-one

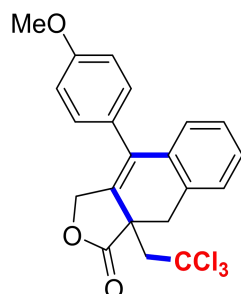

A white solid after purification by flash column chromatography (petroleum ether/ethyl acetate = 40/1). 27.2 mg, 64% yield. Mp: 199-200 °C

**<sup>1</sup>H NMR (600 MHz, CDCl<sub>3</sub>):** δ 7.27 (d, *J* = 4.2 Hz, 2H), 7.25 – 7.22 (m, 1H), 7.11 (d, *J* = 8.4 Hz, 2H), 7.06 (d, *J* = 7.2 Hz, 1H), 6.95 (d, *J* = 8.4 Hz, 2H), 5.34 (d, *J* = 13.2 Hz, 1H), 4.79 (d, *J* = 13.2 Hz, 1H), 3.86 (s, 3H), 3.27 (d, *J* = 15.0 Hz, 1H), 3.24 (d, *J* = 15.0 Hz, 1H), 3.18 (d, *J* = 15.0 Hz, 1H), 2.84 (d, *J* = 15.0 Hz, 1H).

**<sup>13</sup>C NMR (150 MHz, CDCl<sub>3</sub>):** δ 178.7, 159.8, 135.3, 134.3, 132.3, 130.6, 129.3, 128.9, 128.5, 128.2, 127.9, 127.2, 114.2, 96.3, 71.4, 55.3, 55.1, 45.6, 38.5.

**HRMS (ESI, m/z):** calcd for C<sub>21</sub>H<sub>18</sub>Cl<sub>3</sub>O<sub>3</sub> [M + H]<sup>+</sup>, 423.0316; Measured, 423.0312.

11. 4-(4-fluorophenyl)-9a-(2,2,2-trichloroethyl)-9,9a-dihydronaphtho[2,3-c]furan-1(3H)-one

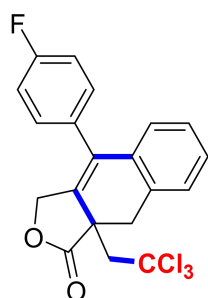

A white solid after purification by flash column chromatography (petroleum ether/ethyl acetate = 40/1). 27.1 mg, 70% yield. Mp: 209-210 °C

**<sup>1</sup>H NMR (400 MHz, CDCl<sub>3</sub>):** δ 5.67 – 5.65 (m, 2H), 5.64 – 5.60 (m, 1H), 5.56 – 5.49 (m, 4H), 5.37 (d, *J* = 7.2 Hz, 1H), 3.70 (d, *J* = 13.6 Hz, 1H), 3.14 (d, *J* = 13.2 Hz, 1H), 1.63 (s, 2H), 1.55 (d, *J* = 15.2 Hz, 1H), 1.23 (d, *J* = 15.6 Hz, 1H).

**<sup>13</sup>C NMR (100 MHz, CDCl<sub>3</sub>):** δ 178.5, 162.7(d, *J* = 247.8 Hz), 134.7, 134.0, 132.2, 132.0, 131.9(d, *J* = 4.1 Hz), 130.9, 129.0, 128.7, 128.0, 127.0, 116.0(d, *J* = 23.7 Hz), 96.2, 71.1, 55.0, 45.6, 38.4.

**<sup>19</sup>F NMR (565 MHz, CDCl<sub>3</sub>):** δ -112.10 (s, 1F).

**HRMS (ESI, m/z):** calcd for C<sub>20</sub>H<sub>18</sub>Cl<sub>3</sub>FNO<sub>2</sub> [M + NH<sub>4</sub>]<sup>+</sup>, 428.0382; Measured, 428.0388.

12. 4-(4-chlorophenyl)-9a-(2,2,2-trichloroethyl)-9,9a-dihydronaphtho[2,3-c]furan-1(3H)-one

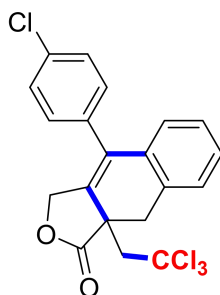

A light yellow solid after purification by flash column chromatography (petroleum ether/ethyl acetate = 40/1). 25.7 mg, 60% yield. Mp: 208-209 °C

**<sup>1</sup>H NMR (400 MHz, CDCl<sub>3</sub>):** δ 7.45 – 7.37 (m, 2H), 7.30 (d, *J* = 4.0 Hz, 2H), 7.27 – 7.23 (m, 1H), 7.12 (d, *J* = 8.8 Hz, 2H), 7.00 (d, *J* = 7.6 Hz, 1H), 5.33 (d, *J* = 13.2 Hz, 1H), 4.77 (d, *J* = 13.2 Hz, 1H), 3.28 (d, *J* = 15.2 Hz, 1H), 3.24 (d, *J* = 14.8 Hz, 1H), 3.18 (d, *J* = 15.2 Hz, 1H), 2.86 (d, *J* = 15.6 Hz, 1H).

**<sup>13</sup>C NMR (100 MHz, CDCl<sub>3</sub>):** δ 178.3, 134.7, 134.6, 134.4, 133.8, 132.2, 131.0, 130.4, 129.1, 129.0, 128.8, 128.0, 127.0, 96.2, 71.0, 55.0, 45.6, 38.3.

**HRMS (ESI, m/z):** calcd for C<sub>20</sub>H<sub>18</sub>Cl<sub>4</sub>NO<sub>2</sub> [M + NH<sub>4</sub>]<sup>+</sup>, 446.0059; Measured, 446.0063.

13. 4-(4-bromophenyl)-9a-(2,2,2-trichloroethyl)-9,9a-dihydronaphtho[2,3-c]furan-1(3H)-one

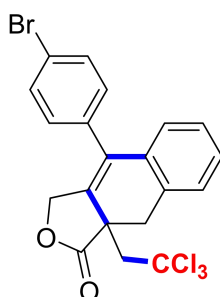

A white solid after purification by flash column chromatography (petroleum ether/ethyl acetate =

40/1). 41.0 mg, 87% yield. Mp: 211-212 °C

**<sup>1</sup>H NMR (600 MHz, CDCl<sub>3</sub>):** δ 7.62 – 7.51 (m, 2H), 7.29 (d, *J* = 4.2 Hz, 2H), 7.25 – 7.23 (m, 1H), 7.06 (d, *J* = 8.4 Hz, 2H), 7.00 (d, *J* = 7.8 Hz, 1H), 5.32 (d, *J* = 13.2 Hz, 1H), 4.76 (d, *J* = 13.8 Hz, 1H), 3.27 (d, *J* = 15.0 Hz, 1H), 3.24 (d, *J* = 15.0 Hz, 1H), 3.18 (d, *J* = 15.6 Hz, 1H), 2.86 (d, *J* = 15.6 Hz, 1H).

**<sup>13</sup>C NMR (150 MHz, CDCl<sub>3</sub>):** δ 178.2, 134.9, 134.6, 133.7, 132.2, 131.9, 131.0, 130.7, 129.0, 128.8, 128.0, 126.9, 122.9, 96.2, 70.9, 55.0, 45.6, 38.3.

**HRMS (ESI, m/z):** calcd for C<sub>20</sub>H<sub>18</sub>BrCl<sub>3</sub>NO<sub>2</sub> [M + NH<sub>4</sub>]<sup>+</sup>, 489.9557; Measured, 489.9563.

14. 4-(thiophen-2-yl)-9a-(2,2,2-trichloroethyl)-9,9a-dihydronaphtho[2,3-c]furan-1(3H)-one

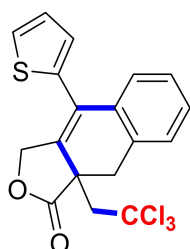

A yellow solid after purification by flash column chromatography (petroleum ether/ethyl acetate = 40/1). 19.2 mg, 48% yield. Mp: 213-214 °C

**<sup>1</sup>H NMR (600 MHz, CDCl<sub>3</sub>):** δ 7.45 (d, *J* = 4.8 Hz, 1H), 7.36 – 7.35 (m, 1H), 7.32 – 7.27 (m, 3H), 7.15 – 7.14 (m, 1H), 6.99 (d, *J* = 3.6 Hz, 1H), 5.37 (d, *J* = 13.8 Hz, 1H), 5.02 (d, *J* = 13.8 Hz, 1H), 3.26 (d, *J* = 15.0 Hz, 1H), 3.21 (d, *J* = 15.0 Hz, 1H), 3.17 (d, *J* = 15.6 Hz, 1H), 2.85 (d, *J* = 15.6 Hz, 1H).

**<sup>13</sup>C NMR (150 MHz, CDCl<sub>3</sub>):** δ 178.3, 137.0, 133.7, 132.1, 131.2, 129.1, 129.0, 128.9, 128.5, 128.0, 127.5, 127.1, 127.0, 96.1, 71.4, 55.0, 45.7, 38.1.

**HRMS (ESI, m/z):** calcd for C<sub>18</sub>H<sub>17</sub>Cl<sub>3</sub>NO<sub>2</sub>S [M + NH<sub>4</sub>]<sup>+</sup>, 418.0012; Measured, 418.0203.

15. 9a-(2,2,2-trichloroethyl)-9,9a-dihydronaphtho[2,3-c]furan-1(3H)-one

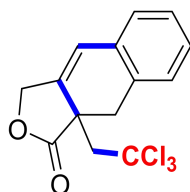

A white solid after purification by flash column chromatography (petroleum ether/ethyl acetate = 40/1). 17.1 mg, 54% yield. Mp: 93-94 °C

**<sup>1</sup>H NMR (600 MHz, CDCl<sub>3</sub>):** δ 7.29 – 7.26 (m, 1H), 7.25 – 7.21 (m, 2H), 7.17 (d, *J* = 7.2 Hz, 1H), 6.60 (s, 1H), 5.25 (dd, *J* = 13.2, 2.4 Hz, 1H), 5.04 (d, *J* = 12.6 Hz, 1H), 3.26 (d, *J* = 15.0 Hz, 1H), 3.18 (d, *J* = 15.0 Hz, 1H), 3.07 (d, *J* = 15.0 Hz, 1H), 2.86 (d, *J* = 15.6 Hz, 1H).

**<sup>13</sup>C NMR (150 MHz, CDCl<sub>3</sub>):** δ 178.1, 135.0, 132.2, 131.0, 129.0, 128.5, 128.1, 127.0, 123.5, 95.9, 71.1, 55.2, 44.7, 38.1.

**HRMS (ESI, m/z):** calcd for C<sub>14</sub>H<sub>12</sub>Cl<sub>3</sub>O<sub>2</sub> [M + H]<sup>+</sup>, 316.9897; Measured, 316.9890.

16. 2,4-diphenyl-9a-(2,2,2-trichloroethyl)-2,3,9a-tetrahydro-1H-benzo[f]isoindol-1-one

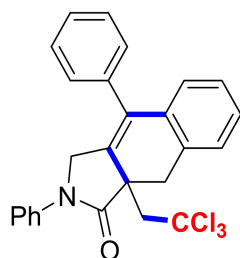

A yellow oil after purification by flash column chromatography (petroleum ether/ethyl acetate = 20/1). 35.2 mg, 75% yield.

**<sup>1</sup>H NMR (600 MHz, CDCl<sub>3</sub>):** δ 7.65 (d, *J* = 7.8 Hz, 2H), 7.50 – 7.47 (m, 1H), 7.41 – 7.39 (m, 2H), 7.37 – 7.33 (m, 3H), 7.29 (d, *J* = 7.8 Hz, 1H), 7.25 – 7.20 (m, 2H), 7.17 – 7.13 (m, 2H), 6.98 (d, *J* = 7.2 Hz, 1H), 4.93 (d, *J* = 13.8 Hz, 1H), 4.28 (d, *J* = 13.8 Hz, 1H), 3.36 (d, *J* = 15.0 Hz, 1H), 3.25 (d, *J* = 15.0 Hz, 1H), 3.23 (d, *J* = 16.2 Hz, 1H), 2.92 (d, *J* = 15.6 Hz, 1H).

**<sup>13</sup>C NMR (150 MHz, CDCl<sub>3</sub>):** δ 174.1, 138.8, 136.9, 135.4, 135.1, 133.1, 129.3, 128.9, 128.9, 128.7, 128.5, 128.3, 128.1, 127.6, 126.9, 125.0, 120.1, 96.9, 54.8, 52.9, 48.9, 38.9.

**HRMS (ESI, m/z):** calcd for C<sub>26</sub>H<sub>21</sub>Cl<sub>3</sub>NO [M + H]<sup>+</sup>, 468.0683; Measured, 468.0680.

17. 4-phenyl-2-(p-tolyl)-9a-(2,2,2-trichloroethyl)-2,3,9a-tetrahydro-1H-benzo[f]isoindol-1-one

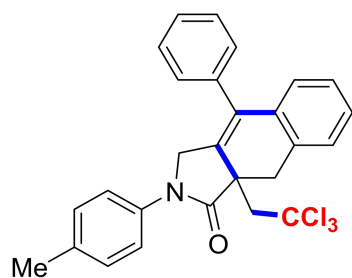

A yellow oil after purification by flash column chromatography (petroleum ether/ethyl acetate = 20/1). 23.2 mg, 48% yield.

**<sup>1</sup>H NMR (600 MHz, CDCl<sub>3</sub>):** δ 7.52 (d, *J* = 8.4 Hz, 2H), 7.48 – 7.47 (m, 1H), 7.41 – 7.39 (m, 2H), 7.35 (d, *J* = 7.8 Hz, 1H), 7.29 (d, *J* = 7.2 Hz, 1H), 7.25 (t, *J* = 7.2 Hz, 1H), 7.21 (t, *J* = 7.8 Hz, 1H), 7.15 (d, *J* = 8.4 Hz, 3H), 6.98 (d, *J* = 7.8 Hz, 1H), 4.90 (d, *J* = 13.8 Hz, 1H), 4.25 (d, *J* = 13.8 Hz, 1H), 3.35 (d, *J* = 15.0 Hz, 1H), 3.24 (d, *J* = 14.4 Hz, 1H), 3.22 (d, *J* = 15.0 Hz, 1H), 2.91 (d, *J* = 15.6 Hz, 1H), 2.31 (s, 3H).

**<sup>13</sup>C NMR (150 MHz, CDCl<sub>3</sub>):** δ 173.9, 137.0, 136.3, 135.3, 135.1, 134.8, 133.2, 129.4, 129.1, 128.9, 128.6, 128.5, 128.2, 128.1, 127.6, 126.9, 120.1, 97.0, 54.8, 53.0, 48.9, 38.9, 20.9.

**HRMS (ESI, *m/z*):** calcd for C<sub>27</sub>H<sub>23</sub>Cl<sub>3</sub>NO [M + H]<sup>+</sup>, 482.0840; Measured, 482.0835.

18.

2-(4-methoxyphenyl)-4-phenyl-9a-(2,2,2-trichloroethyl)-2,3,9a-tetrahydro-1H-benzo[f]isoindol-1-one

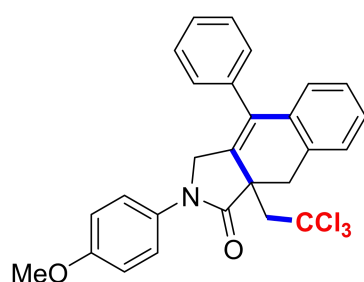

A light yellow solid after purification by flash column chromatography (petroleum ether/ethyl acetate = 20/1). 30.9 mg, 62% yield. Mp: 168-169 °C

**<sup>1</sup>H NMR (600 MHz, CDCl<sub>3</sub>):** δ 7.55 – 7.53 (m, 2H), 7.47 – 7.45 (m, 1H), 7.40 – 7.37 (m, 2H), 7.36 – 7.32 (m, 1H), 7.28 (d, *J* = 7.2 Hz, 1H), 7.24 – 7.15 (m, 3H), 6.98 (d, *J* = 7.8 Hz, 1H), 6.88 – 6.86 (m, 2H), 4.89 (d, *J* = 13.8 Hz, 1H), 4.23 (d, *J* = 13.8 Hz,



1H), 3.77 (s, 3H), 3.34 (d,  $J = 15.0$  Hz, 1H), 3.23 (d,  $J = 15.0$  Hz, 1H), 3.21 (d,  $J = 15.6$  Hz, 1H), 2.91 (d,  $J = 15.6$  Hz, 1H).

**$^{13}\text{C}$  NMR (150 MHz,  $\text{CDCl}_3$ ):**  $\delta$  173.7, 156.9, 137.0, 135.2, 135.1, 133.2, 132.1, 129.2, 128.9, 128.2, 128.1, 127.6, 126.9, 121.8, 114.1, 97.0, 55.4, 54.8, 53.3, 48.7, 38.9.

**HRMS (ESI,  $m/z$ ):** calcd for  $\text{C}_{27}\text{H}_{23}\text{Cl}_3\text{NO}_2$  [ $\text{M} + \text{H}$ ] $^+$ , 500.0764; Measured, 500.0757.

19. 9a-(2,2-dichloroethyl)-4-phenyl-9,9a-dihydronaphtho[2,3-c]furan-1(3H)-one

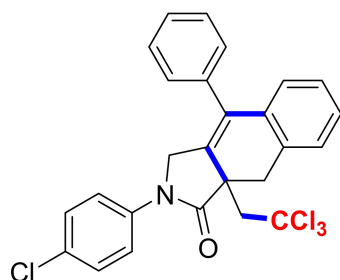

A yellow oil after purification by flash column chromatography (petroleum ether/ethyl acetate = 40/1). 30.2 mg, 60% yield.

**$^1\text{H}$  NMR (400 MHz,  $\text{CDCl}_3$ ):**  $\delta$  7.62 (d,  $J = 8.8$  Hz, 2H), 7.50 – 7.47 (m, 1H), 7.43 – 7.39 (m, 2H), 7.36 – 7.34 (m, 1H), 7.31 – 7.28 (m, 3H), 7.25 – 7.23 (m, 1H), 7.21 – 7.14 (m, 2H), 6.98 (d,  $J = 7.6$  Hz, 1H), 4.89 (d,  $J = 14.0$  Hz, 1H), 4.25 (d,  $J = 14.0$  Hz, 1H), 3.33 (d,  $J = 15.2$  Hz, 1H), 3.25 (d,  $J = 12.0$  Hz, 1H), 3.22 (d,  $J = 12.0$  Hz, 1H), 2.91 (d,  $J = 15.2$  Hz, 1H).

**$^{13}\text{C}$  NMR (100 MHz,  $\text{CDCl}_3$ ):**  $\delta$  174.2, 137.4, 136.7, 135.6, 134.9, 132.9, 130.1, 129.3, 128.9, 128.7, 128.6, 128.3, 128.3, 128.2, 127.7, 127.0, 121.1, 96.9, 54.8, 52.7, 48.9, 38.8.

**HRMS (ESI,  $m/z$ ):** calcd for  $\text{C}_{26}\text{H}_{20}\text{Cl}_2\text{NO}$  [ $\text{M} + \text{H}$ ] $^+$ , 504.0267; Measured, 504.0261.

20. 9a-(2,2-dichloroethyl)-4-phenyl-9,9a-dihydronaphtho[2,3-c]furan-1(3H)-one

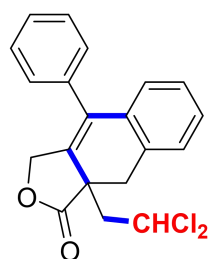

A white solid after purification by flash column chromatography (petroleum ether/ethyl acetate = 40/1). 10.8 mg, 30% yield. Mp: 85-86 °C

**<sup>1</sup>H NMR (600 MHz, CDCl<sub>3</sub>):** δ 7.46 – 7.41 (m, 3H), 7.29 – 7.27 (m, 2H), 7.23 – 7.19 (m, 3H), 7.02 (d, *J* = 7.2 Hz, 1H), 5.86 (dd, *J* = 7.2, 4.8 Hz, 1H), 5.26 (d, *J* = 13.8 Hz, 1H), 4.73 (d, *J* = 13.8 Hz, 1H), 3.17 (d, *J* = 15.6 Hz, 1H), 3.05 (d, *J* = 15.6 Hz, 1H), 2.76 – 2.69 (m, 2H).

**<sup>13</sup>C NMR (150 MHz, CDCl<sub>3</sub>):** δ 178.1, 135.8, 135.7, 133.8, 132.3, 131.4, 129.1, 128.7, 128.7, 127.7, 127.1, 70.5, 69.3, 46.2, 44.9, 36.5.

**HRMS (ESI, m/z):** calcd for C<sub>20</sub>H<sub>20</sub>Cl<sub>2</sub>NO<sub>2</sub> [M + NH<sub>4</sub>]<sup>+</sup>, 376.0866; Measured, 376.0873.

21. 9a-(2-chloro-2-methylpropyl)-4-phenyl-9,9a-dihydronaphtho[2,3-c]furan-1(3H)-one

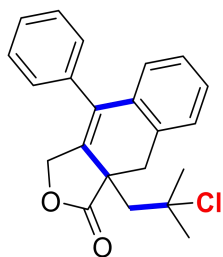

A white solid after purification by flash column chromatography (petroleum ether/ethyl acetate = 40/1). 22.2 mg, 63% yield. Mp: 144-145 °C

**<sup>1</sup>H NMR (400 MHz, CDCl<sub>3</sub>):** δ 7.44 – 7.37 (m, 3H), 7.26 – 7.24 (m, 2H), 7.22 – 7.17 (m, 3H), 7.01 (d, *J* = 7.2 Hz, 1H), 5.43 (d, *J* = 13.6 Hz, 1H), 4.76 (d, *J* = 13.6 Hz, 1H), 3.14 (d, *J* = 15.2 Hz, 1H), 2.84 (d, *J* = 15.2 Hz, 1H), 2.37 (d, *J* = 14.8 Hz, 1H), 2.22 (d, *J* = 14.8 Hz, 1H), 1.62 (s, 3H), 1.57 (s, 3H).

**<sup>13</sup>C NMR (100 MHz, CDCl<sub>3</sub>):** δ 180.2, 136.4, 134.3, 134.2, 133.2, 129.2, 128.9, 128.7, 128.4, 128.2, 127.4, 126.9, 71.1, 68.1, 47.4, 44.9, 39.1, 34.4, 33.3.

**HRMS (ESI, m/z):** calcd for C<sub>22</sub>H<sub>25</sub>ClNO<sub>2</sub> [M + NH<sub>4</sub>]<sup>+</sup>, 370.1568; Measured, 370.1574.

22. 9a-(2-chloro-2-methylpropyl)-4-(p-tolyl)-9,9a-dihydronaphtho[2,3-c]furan-1(3H)-one

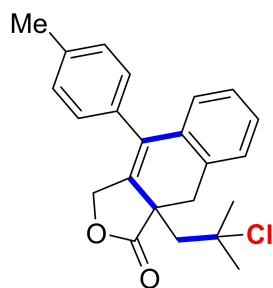

A white solid after purification by flash column chromatography (petroleum ether/ethyl acetate = 40/1). 25.7 mg, 70% yield. Mp: 161-162 °C

**<sup>1</sup>H NMR (400 MHz, CDCl<sub>3</sub>):** δ 7.25 – 7.23 (m, 3H), 7.22 – 7.20 (m, 1H), 7.20 – 7.17 (m, 1H), 7.12 – 7.05 (m, 2H), 7.02 (d, *J* = 7.6 Hz, 1H), 5.42 (d, *J* = 13.2 Hz, 1H), 4.76 (d, *J* = 13.2 Hz, 1H), 3.13 (d, *J* = 15.2 Hz, 1H), 2.83 (d, *J* = 15.2 Hz, 1H), 2.41 (s, 3H), 2.36 (d, *J* = 14.8 Hz, 1H), 2.22 (d, *J* = 14.8 Hz, 1H), 1.62 (s, 3H), 1.57 (s, 3H).

**<sup>13</sup>C NMR (100 MHz, CDCl<sub>3</sub>):** δ 180.3, 138.3, 134.4, 134.1, 133.4, 133.3, 132.7, 129.2, 128.8, 128.1, 127.4, 126.9, 71.2, 68.2, 47.4, 44.8, 39.1, 34.3, 33.4, 21.3.

**HRMS (ESI, m/z):** calcd for C<sub>23</sub>H<sub>27</sub>ClNO<sub>2</sub> [M + NH<sub>4</sub>]<sup>+</sup>, 384.1725; Measured, 384.1731.

23. 9a-(2-chloro-2-methylpropyl)-4-(4-nitrophenyl)-9,9a-dihydronaphtho[2,3-c]furan-1(3H)-one

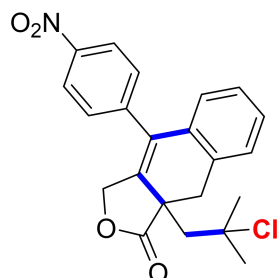

A light yellow solid after purification by flash column chromatography (petroleum ether/ethyl acetate = 10/1). 12.0 mg, 30% yield. Mp: 188-189 °C

**<sup>1</sup>H NMR (400 MHz, CDCl<sub>3</sub>):** δ 8.30 (s, 2H), 7.39 (d, *J* = 8.4 Hz, 2H), 7.29 (d, *J* = 4.8 Hz, 2H), 7.24 – 7.21 (m, 1H), 6.91 (d, *J* = 7.2 Hz, 1H), 5.47 (d, *J* = 13.6 Hz, 1H), 4.72 (d, *J* = 14.0 Hz, 1H), 3.15 (d, *J* = 15.6 Hz, 1H), 2.87 (d, *J* = 15.6 Hz, 1H), 2.41 (d, *J* = 14.8 Hz, 1H), 2.19 (d, *J* = 14.8 Hz, 1H), 1.64 (s, 3H), 1.56 (s, 3H).

**<sup>13</sup>C NMR (100 MHz, CDCl<sub>3</sub>):** δ 179.4, 147.6, 143.4, 136.3, 133.3, 133.1, 132.4, 130.0, 129.2, 128.9, 127.8, 126.5, 124.0, 70.7, 68.1, 47.6, 45.0, 38.9, 35.1, 32.6.

**HRMS (ESI, m/z):** calcd for C<sub>22</sub>H<sub>24</sub>ClN<sub>2</sub>O<sub>4</sub> [M + NH<sub>4</sub>]<sup>+</sup>, 415.1419; Measured, 415.1426.

24.

4-(9a-(2-chloro-2-methylpropyl)-1-oxo-1,3,9,9a-tetrahydronaphtho[2,3-c]furan-4-yl)benzonitrile

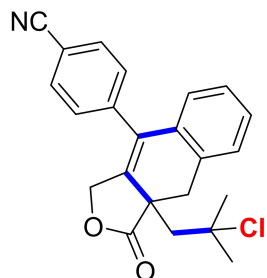

A light yellow solid after purification by flash column chromatography (petroleum ether/ethyl acetate = 10/1). 25.7 mg, 68% yield. Mp: 168-169 °C

**<sup>1</sup>H NMR (400 MHz, CDCl<sub>3</sub>):** δ 7.76 – 7.70 (m, 2H), 7.34 – 7.30 (m, 2H), 7.27 (d, *J* = 4.0 Hz, 2H), 7.24 – 7.20 (m, 1H), 6.90 (d, *J* = 7.2 Hz, 1H), 5.44 (d, *J* = 13.6 Hz, 1H), 4.70 (d, *J* = 13.6 Hz, 1H), 3.13 (d, *J* = 15.2 Hz, 1H), 2.85 (d, *J* = 15.2 Hz, 1H), 2.39 (d, *J* = 14.8 Hz, 1H), 2.18 (d, *J* = 14.8 Hz, 1H), 1.62 (s, 3H), 1.55 (s, 3H).

**<sup>13</sup>C NMR (100 MHz, CDCl<sub>3</sub>):** δ 179.5, 141.4, 135.8, 133.3, 133.1, 132.6, 132.2, 129.8, 129.1, 128.7, 127.7, 126.5, 118.4, 112.1, 70.7, 68.1, 47.5, 44.9, 38.9, 35.0, 32.7.

**HRMS (ESI, m/z):** calcd for C<sub>23</sub>H<sub>24</sub>ClN<sub>2</sub>O<sub>2</sub> [M + NH<sub>4</sub>]<sup>+</sup>, 395.1521; Measured, 395.1526.

25.

4-(4-(tert-butyl)phenyl)-9a-(2-chloro-2-methylpropyl)-9,9a-dihydronaphtho[2,3-c]furan-1(3H)-one

e

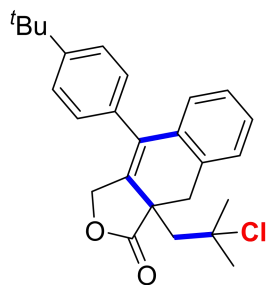

A white solid after purification by flash column chromatography (petroleum ether/ethyl acetate =

40/1). 25.0 mg, 61% yield. Mp: 139-140 °C

**<sup>1</sup>H NMR (400 MHz, CDCl<sub>3</sub>):** δ 7.47 – 7.40 (m, 2H), 7.25 – 7.23 (m, 2H), 7.22 – 7.18 (m, 1H), 7.13 – 7.11 (m, 2H), 7.06 (d, *J* = 6.8 Hz, 1H), 5.44 (d, *J* = 13.2 Hz, 1H), 4.81 (d, *J* = 13.6 Hz, 1H), 3.13 (d, *J* = 15.2 Hz, 1H), 2.83 (d, *J* = 15.2 Hz, 1H), 2.35 (d, *J* = 14.8 Hz, 1H), 2.23 (d, *J* = 15.2 Hz, 1H), 1.62 (s, 3H), 1.57 (s, 3H), 1.36 (s, 9H).

**<sup>13</sup>C NMR (100 MHz, CDCl<sub>3</sub>):** δ 180.4, 151.4, 134.3, 134.1, 133.4, 133.3, 132.7, 128.8, 128.5, 128.1, 127.4, 127.0, 125.4, 71.3, 68.2, 47.3, 44.9, 39.1, 34.7, 34.3, 33.4, 31.3.

**HRMS (ESI, m/z):** calcd for C<sub>26</sub>H<sub>33</sub>ClNO<sub>2</sub> [M + NH<sub>4</sub>]<sup>+</sup>, 426.2194; Measured, 426.2200.

26.

9a-(2-chloro-2-methylpropyl)-4-(4-(trifluoromethyl)phenyl)-9,9a-dihydronaphtho[2,3-c]furan-1(3H)-one

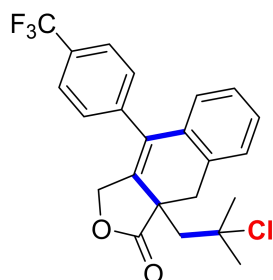

A white solid after purification by flash column chromatography (petroleum ether/ethyl acetate = 40/1). 22.7 mg, 54% yield. Mp: 175-176 °C

**<sup>1</sup>H NMR (400 MHz, CDCl<sub>3</sub>):** δ 7.73 – 7.66 (m, 2H), 7.36 – 7.32 (m, 2H), 7.28 – 7.26 (m, 2H), 7.25 – 7.20 (m, 1H), 6.94 (d, *J* = 7.2 Hz, 1H), 5.45 (d, *J* = 13.6 Hz, 1H), 4.73 (d, *J* = 13.6 Hz, 1H), 3.16 (d, *J* = 15.2 Hz, 1H), 2.86 (d, *J* = 15.2 Hz, 1H), 2.40 (d, *J* = 14.8 Hz, 1H), 2.21 (d, *J* = 14.8 Hz, 1H), 1.64 (s, 3H), 1.57 (s, 3H).

**<sup>13</sup>C NMR (100 MHz, CDCl<sub>3</sub>):** δ 179.7, 140.3, 135.0, 133.7, 133.1, 132.9, 130.4(q, *J* = 32.3 Hz), 129.4(d, *J* = 28.7 Hz), 129.0, 128.6, 127.6, 126.6, 125.5(d, *J* = 15.7 Hz), 123.9(q, *J* = 270.9 Hz), 70.8, 68.1, 47.5, 44.9, 39.0, 34.9, 32.8.

**<sup>19</sup>F NMR (565 MHz, CDCl<sub>3</sub>):** δ -62.66 (s, 3F).

**HRMS (ESI, m/z):** calcd for C<sub>23</sub>H<sub>24</sub>ClF<sub>3</sub>NO<sub>2</sub> [M + NH<sub>4</sub>]<sup>+</sup>, 438.1442; Measured, 438.1449.

27.

9a-(2-chloro-2-methylpropyl)-4-(4-methoxyphenyl)-9,9a-dihydronaphtho[2,3-c]furan-1(3H)-one

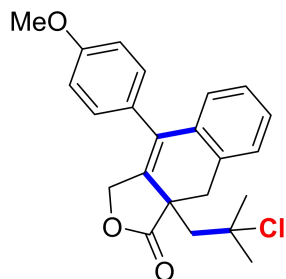

A white oil after purification by flash column chromatography (petroleum ether/ethyl acetate = 40/1). 20.3 mg, 53% yield.

**<sup>1</sup>H NMR (600 MHz, CDCl<sub>3</sub>):** δ 7.25 – 7.23 (m, 2H), 7.21 – 7.18 (m, 1H), 7.15 – 7.09 (m, 2H), 7.02 (d, *J* = 7.2 Hz, 1H), 6.95 (d, *J* = 8.4 Hz, 2H), 5.41 (d, *J* = 13.8 Hz, 1H), 4.77 (d, *J* = 13.2 Hz, 1H), 3.86 (s, 3H), 3.12 (d, *J* = 15.0 Hz, 1H), 2.82 (d, *J* = 15.0 Hz, 1H), 2.35 (d, *J* = 15.0 Hz, 1H), 2.21 (d, *J* = 15.0 Hz, 1H), 1.61 (s, 3H), 1.56 (s, 3H).

**<sup>13</sup>C NMR (150 MHz, CDCl<sub>3</sub>):** δ 180.3, 159.6, 134.4, 133.8, 133.4, 132.2, 128.8, 128.6, 128.1, 127.4, 126.8, 71.2, 68.2, 55.3, 47.4, 44.8, 39.1, 34.4, 33.3.

**HRMS (ESI, *m/z*):** calcd for C<sub>23</sub>H<sub>24</sub>ClO<sub>3</sub> [M + H]<sup>+</sup>, 383.1408; Measured, 383.1404.

28. 9a-(2-chloro-2-methylpropyl)-4-(4-fluorophenyl)-9,9a-dihydronaphtho[2,3-c]furan-1(3H)-one

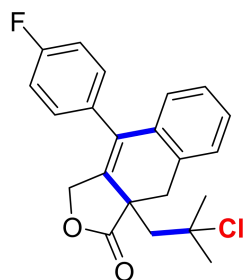

A white solid after purification by flash column chromatography (petroleum ether/ethyl acetate = 40/1). 27.1 mg, 73% yield. Mp: 157-158 °C

**<sup>1</sup>H NMR (400 MHz, CDCl<sub>3</sub>):** δ 7.27 – 7.25 (m, 2H), 7.23 – 7.19 (m, 2H), 7.16 – 7.11 (m, 3H), 6.97 (d, *J* = 7.6 Hz, 1H), 5.41 (d, *J* = 13.6 Hz, 1H), 4.74 (d, *J* = 13.6 Hz, 1H), 3.14 (d, *J* = 14.8 Hz, 1H), 2.84 (d, *J* = 15.2 Hz, 1H), 2.37 (d, *J* = 14.8 Hz, 1H), 2.20 (d, *J* = 14.8 Hz, 1H), 1.62 (s, 3H), 1.56 (s, 3H).

**<sup>13</sup>C NMR (100 MHz, CDCl<sub>3</sub>):** δ 180.0, 162.6(d, *J* = 247.0 Hz), 134.1, 133.5, 133.2, 133.1, 132.3(d, *J* = 3.5 Hz), 130.8(d, *J* = 27.0 Hz), 128.9, 128.3, 127.5, 126.7, 115.8(d, *J* = 22.3 Hz), 71.0, 68.1, 47.4, 44.8, 39.0, 34.7, 33.0.

**<sup>19</sup>F NMR (565 MHz, CDCl<sub>3</sub>):** δ -112.70 (s, 1F).

**HRMS (ESI, m/z):** calcd for C<sub>22</sub>H<sub>24</sub>ClFNO<sub>2</sub> [M + NH<sub>4</sub>]<sup>+</sup>, 388.1474; Measured, 388.1479.

29. 9a-(2-chloro-2-methylpropyl)-4-(4-chlorophenyl)-9,9a-dihydronaphtho[2,3-c]furan-1(3H)-one

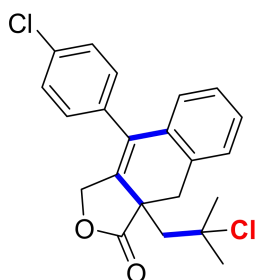

A white solid after purification by flash column chromatography (petroleum ether/ethyl acetate = 40/1). 23.4 mg, 60% yield. Mp: 141-142 °C

**<sup>1</sup>H NMR (400 MHz, CDCl<sub>3</sub>):** δ 7.44 – 7.37 (m, 2H), 7.26 – 7.25 (m, 2H), 7.23 – 7.20 (m, 1H), 7.16 – 7.12 (m, 2H), 6.96 (d, *J* = 7.2 Hz, 1H), 5.42 (d, *J* = 13.2 Hz, 1H), 4.74 (d, *J* = 13.6 Hz, 1H), 3.13 (d, *J* = 15.2 Hz, 1H), 2.84 (d, *J* = 15.2 Hz, 1H), 2.37 (d, *J* = 14.8 Hz, 1H), 2.20 (d, *J* = 14.8 Hz, 1H), 1.62 (s, 3H), 1.56 (s, 3H).

**<sup>13</sup>C NMR (100 MHz, CDCl<sub>3</sub>):** δ 179.9, 134.8, 134.3, 133.9, 133.2, 130.5, 130.1, 129.0, 128.9, 128.4, 127.5, 126.6, 70.9, 68.1, 47.4, 44.8, 39.0, 34.7, 33.0.

**HRMS (ESI, m/z):** calcd for C<sub>22</sub>H<sub>24</sub>Cl<sub>2</sub>NO<sub>2</sub> [M + NH<sub>4</sub>]<sup>+</sup>, 404.1179; Measured, 404.1187.

30. 9a-(2-chloro-2-methylpropyl)-4-(thiophen-2-yl)-9,9a-dihydronaphtho[2,3-c]furan-1(3H)-one

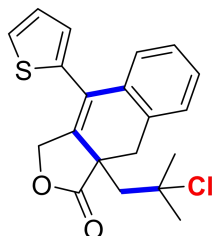

A white solid after purification by flash column chromatography (petroleum ether/ethyl acetate = 40/1). 18.7 mg, 52% yield. Mp: 137-138 °C

**<sup>1</sup>H NMR (600 MHz, CDCl<sub>3</sub>):** δ 7.43 – 7.42 (m, 1H), 7.34 – 7.32 (m, 1H), 7.27 – 7.23 (m, 3H), 7.13 (dd, *J* = 5.4, 3.6 Hz, 1H), 7.00 – 6.99 (m, 1H), 5.45 (d, *J* = 13.8 Hz, 1H), 4.99 (d, *J* = 13.8 Hz, 1H), 3.11 (d, *J* = 15.6 Hz, 1H), 2.82 (d, *J* = 15.0 Hz, 1H), 2.31 (d, *J* = 15.0 Hz, 1H), 2.23 (d, *J* = 15.0 Hz, 1H), 1.59 (s, 3H), 1.53 (s, 3H).

**<sup>13</sup>C NMR (150 MHz, CDCl<sub>3</sub>):** δ 179.9, 137.4, 134.3, 133.9, 133.1, 128.9, 128.6, 128.2, 127.7, 127.6, 127.4, 126.7, 71.2, 68.0, 47.4, 45.0, 38.8, 34.1, 33.5.

**HRMS (ESI, m/z):** calcd for C<sub>20</sub>H<sub>23</sub>ClNO<sub>2</sub>S [M + NH<sub>4</sub>]<sup>+</sup>, 376.1133; Measured, 376.1137.

31. 9a-(2-chloro-2-methylpropyl)-2,4-diphenyl-2,3,9,9a-tetrahydro-1H-benzo[*f*]isoindol-1-one

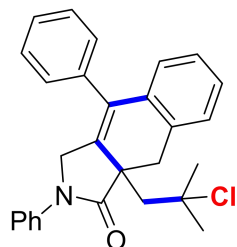

A yellow oil after purification by flash column chromatography (petroleum ether/ethyl acetate = 20/1). 19.3 mg, 45% yield.

**<sup>1</sup>H NMR (600 MHz, CDCl<sub>3</sub>):** δ 7.67 (d, *J* = 7.8 Hz, 2H), 7.49 – 7.47 (m, 1H), 7.42 – 7.39 (m, 3H), 7.36 (d, *J* = 7.8 Hz, 1H), 7.34 (d, *J* = 7.2 Hz, 1H), 7.26 (d, *J* = 8.4 Hz, 1H), 7.23 – 7.21 (m, 1H), 7.19 – 7.13 (m, 3H), 6.95 (d, *J* = 7.2 Hz, 1H), 5.00 (d, *J* = 13.8 Hz, 1H), 4.26 (d, *J* = 13.8 Hz, 1H), 3.18 (d, *J* = 15.0 Hz, 1H), 2.90 (d, *J* = 15.0 Hz, 1H), 2.37 (d, *J* = 14.4 Hz, 1H), 2.29 (d, *J* = 14.4 Hz, 1H), 1.57 (s, 3H), 1.55 (s, 3H).

**<sup>13</sup>C NMR (150 MHz, CDCl<sub>3</sub>):** δ 175.9, 139.0, 137.4, 135.2, 134.2, 134.0, 131.8, 128.9, 128.8, 128.0, 127.7, 127.1, 126.6, 124.8, 120.1, 68.7, 52.9, 48.3, 47.2, 39.6, 34.8, 33.4.

**HRMS (ESI, m/z):** calcd for C<sub>28</sub>H<sub>27</sub>ClNO [M + H]<sup>+</sup>, 428.1776; Measured, 428.1772.

32. 4-([1,1'-biphenyl]-4-yl)naphtho[2,3-*c*]furan-1(3H)-one



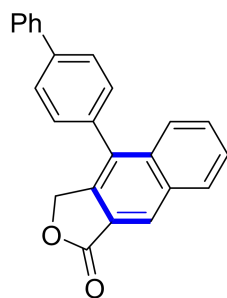

A white solid after purification by flash column chromatography (petroleum ether/ethyl acetate = 20/1). 20.6 mg, 61% yield. Mp: 202-203 °C

**<sup>1</sup>H NMR (600 MHz, CDCl<sub>3</sub>):** δ 8.54 (s, 1H), 8.13 – 8.11 (m, 1H), 7.92 – 7.90 (m, 1H), 7.79 (d, *J* = 7.8 Hz, 2H), 7.70 (d, *J* = 7.2 Hz, 2H), 7.63 – 7.61 (m, 2H), 7.51 (t, *J* = 7.8 Hz, 2H), 7.48 (d, *J* = 7.2 Hz, 2H), 7.43 – 7.41 (m, 1H), 5.33 (s, 2H).

**<sup>13</sup>C NMR (150 MHz, CDCl<sub>3</sub>):** δ 171.2, 141.3, 140.3, 138.5, 134.9, 134.7, 133.8, 133.7, 130.2, 129.8, 129.1, 129.0, 127.8, 127.7, 127.1, 126.8, 126.5, 125.9, 123.0, 69.6.

**HRMS (ESI, m/z):** calcd for C<sub>24</sub>H<sub>16</sub>O<sub>2</sub>Na [M + Na]<sup>+</sup>, 359.1043; Measured, 359.1047.

33. 4-phenylnaphtho[2,3-c]furan-1(3H)-one

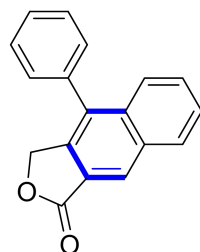

A white solid after purification by flash column chromatography (petroleum ether/ethyl acetate = 20/1). 16.7 mg, 64% yield. Mp: 159-160 °C

**<sup>1</sup>H NMR (600 MHz, CDCl<sub>3</sub>):** δ 8.51 (s, 1H), 8.10 – 8.08 (m, 1H), 7.82 – 7.81 (m, 1H), 7.62 – 7.55 (m, 4H), 7.53 – 7.50 (m, 1H), 7.40 – 7.38 (m, 2H), 5.26 (s, 2H).

**<sup>13</sup>C NMR (150 MHz, CDCl<sub>3</sub>):** δ 171.2, 138.4, 135.8, 134.8, 134.1, 133.7, 130.1, 129.3, 129.0, 129.0, 128.4, 126.7, 126.4, 125.9, 122.9, 69.5.

**HRMS (ESI, m/z):** calcd for C<sub>18</sub>H<sub>13</sub>O<sub>2</sub> [M + H]<sup>+</sup>, 261.0910; Measured, 261.0909.

34. 4-(4-(tert-butyl)phenyl)naphtho[2,3-c]furan-1(3H)-one

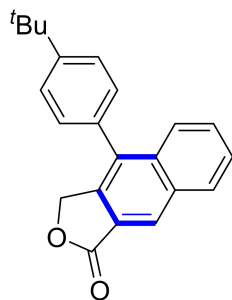

A white solid after purification by flash column chromatography (petroleum ether/ethyl acetate = 20/1). 19.6 mg, 62% yield. Mp: 276-277 °C

**<sup>1</sup>H NMR (600 MHz, CDCl<sub>3</sub>):** δ 8.51 (s, 1H), 8.10 – 8.08 (m, 1H), 7.88 – 7.86 (m, 1H), 7.60 – 7.56 (m, 4H), 7.33 – 7.32 (m, 2H), 5.30 (s, 2H), 1.42 (s, 9H).

**<sup>13</sup>C NMR (150 MHz, CDCl<sub>3</sub>):** δ 171.3, 151.4, 138.5, 135.0, 134.3, 133.7, 132.7, 130.1, 129.0, 128.9, 126.7, 126.2, 126.1, 125.9, 123.0, 69.8, 34.8, 31.3.

**HRMS (ESI, m/z):** calcd for C<sub>22</sub>H<sub>19</sub>O<sub>2</sub> [M – H]<sup>+</sup>, 315.1380; Measured, 315.1395.

35. 4-(1-oxo-1,3-dihydro-2H-naphtho[2,3-c]furan-4-yl)benzotrifluoride

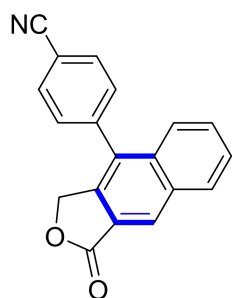

A white solid after purification by flash column chromatography (petroleum ether/ethyl acetate = 5/1). 21.1 mg, 74% yield. Mp: 216-217 °C

**<sup>1</sup>H NMR (600 MHz, CDCl<sub>3</sub>):** δ 8.57 (s, 1H), 8.14 – 8.12 (m, 1H), 7.90 – 7.88 (m, 2H), 7.69 – 7.68 (m, 1H), 7.66 – 7.63 (m, 2H), 7.56 – 7.55 (m, 2H), 5.25 (s, 2H).

**<sup>13</sup>C NMR (150 MHz, CDCl<sub>3</sub>):** δ 170.6, 140.8, 138.4, 134.2, 133.7, 132.9, 131.9, 130.4, 130.3, 129.7, 127.6, 127.2, 125.1, 123.0, 118.3, 112.7, 69.1.

**HRMS (ESI, m/z):** calcd for C<sub>19</sub>H<sub>12</sub>NO<sub>2</sub> [M + H]<sup>+</sup>, 286.0863; Measured, 286.0862.

36. (3-(2-chlorovinyl)-1-phenylnaphthalen-2-yl)methanol

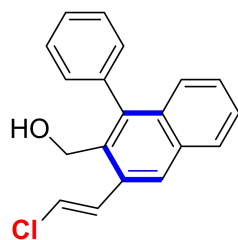

A white solid after purification by flash column chromatography (petroleum ether/ethyl acetate = 20/1). 19.8 mg, 67% yield. Mp: 103-104 °C

**<sup>1</sup>H NMR (600 MHz, CDCl<sub>3</sub>):** δ 7.89 (s, 1H), 7.85 (d, *J* = 7.8 Hz, 1H), 7.53 – 7.46 (m, 5H), 7.35 (d, *J* = 4.2 Hz, 2H), 7.32 – 7.30 (m, 2H), 6.75 (d, *J* = 13.2 Hz, 1H), 4.57 (s, 2H).

**<sup>13</sup>C NMR (150 MHz, CDCl<sub>3</sub>):** δ 140.4, 138.3, 133.2, 132.9, 132.8, 132.6, 131.9, 130.1, 128.4, 127.8, 127.6, 127.1, 126.5, 126.3, 125.9, 120.9, 60.4.

**HRMS (ESI, m/z):** calcd for C<sub>19</sub>H<sub>14</sub>ClO [M – H]<sup>+</sup>, 293.0728; Measured, 293.0744.

37. (3-(2-chlorovinyl)-1-(p-tolyl)naphthalen-2-yl)methanol

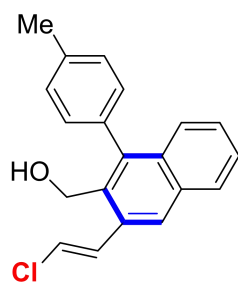

A white solid after purification by flash column chromatography (petroleum ether/ethyl acetate = 40/1). 17.9 mg, 58% yield. Mp: 103-104 °C

**<sup>1</sup>H NMR (400 MHz, CDCl<sub>3</sub>):** δ 7.87 (s, 1H), 7.84 (d, *J* = 8.0 Hz, 1H), 7.50 – 7.45 (m, 2H), 7.38 – 7.31 (m, 4H), 7.19 (d, *J* = 7.6 Hz, 2H), 6.74 (d, *J* = 13.2 Hz, 1H), 4.58 (s, 2H), 2.48 (s, 3H).

**<sup>13</sup>C NMR (150 MHz, CDCl<sub>3</sub>):** δ 140.5, 137.3, 135.2, 133.2, 132.9, 132.9, 132.7, 131.9, 130.0, 129.1, 127.8, 127.2, 126.4, 126.2, 125.7, 120.8, 60.4, 21.3.

**HRMS (ESI, m/z):** calcd for C<sub>20</sub>H<sub>16</sub>ClO [M – H]<sup>+</sup>, 307.0884; Measured, 307.0904.

38-a. 3-methyl-1-tosyl-4-(2,2,2-trichloroethyl)pyrrolidine

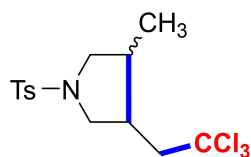

A transparent oil after purification by flash column chromatography (petroleum ether/ethyl acetate = 20/1). 22.6 mg, 61% yield.

**$^1\text{H}$  NMR (600 MHz,  $\text{CDCl}_3$ ):**  $\delta$  7.72 – 7.70 (m, 2H), 7.32 (d,  $J = 7.8$  Hz, 2H), 3.67 – 3.64 (m, 1H), 3.37 – 3.34 (m, 1H), 3.18 – 3.15 (m, 1H), 3.06 (dd,  $J = 10.2, 3.0$  Hz, 1H), 2.78 – 2.74 (m, 1H), 2.49 – 2.45 (m, 2H), 2.42 (s, 3H), 2.36 – 2.32 (m, 1H), 0.78 (d,  $J = 7.2$  Hz, 3H).

**$^{13}\text{C}$  NMR (150 MHz,  $\text{CDCl}_3$ ):**  $\delta$  143.5, 133.9, 129.7, 127.3, 98.7, 54.3, 53.5, 51.0, 39.7, 35.9, 21.5, 13.5.

**HRMS (ESI, m/z):** calcd for  $\text{C}_{14}\text{H}_{19}\text{Cl}_3\text{NO}_2\text{S}$   $[\text{M} + \text{H}]^+$ , 370.0197; Measured, 370.0191.

38-b. 3-methyl-1-tosyl-4-(2,2,2-trichloroethyl)pyrrolidine

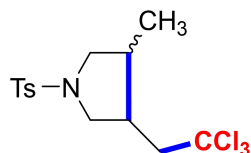

A transparent oil after purification by flash column chromatography (petroleum ether/ethyl acetate = 20/1). 9.3 mg, 25% yield.

**$^1\text{H}$  NMR (600 MHz,  $\text{CDCl}_3$ ):**  $\delta$  7.72 – 7.70 (m, 2H), 7.32 (d,  $J = 7.8$  Hz, 2H), 3.84 (dd,  $J = 10.2, 7.2$  Hz, 1H), 3.53 – 3.50 (m, 1H), 3.12 – 3.09 (m, 1H), 2.81 (dd,  $J = 15.0, 1.8$  Hz, 1H), 2.78 – 2.74 (m, 1H), 2.58 (dd,  $J = 15.0, 9.0$  Hz, 1H), 2.43 (s, 3H), 2.00 – 1.94 (m, 1H), 1.83 – 1.77 (m, 1H), 0.99 (d,  $J = 6.6$  Hz, 3H).

**$^{13}\text{C}$  NMR (150 MHz,  $\text{CDCl}_3$ ):**  $\delta$  143.5, 133.6, 129.7, 127.4, 98.4, 76.8, 57.3, 53.8, 53.5, 43.5, 38.8, 15.5.

# Copies of the $^1\text{H}$ NMR, $^{13}\text{C}$ NMR, $^{19}\text{F}$ NMR

## $^1\text{H}$ NMR (400 MHz, $\text{CDCl}_3$ )

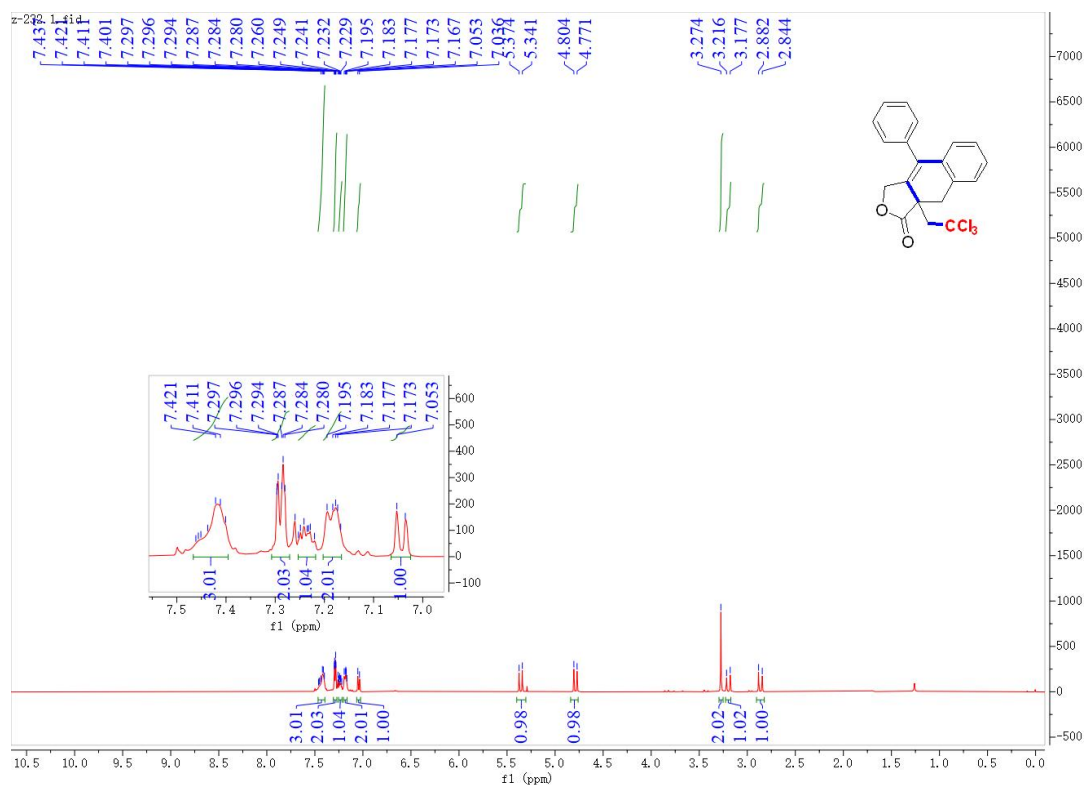

## $^{13}\text{C}\{^1\text{H}\}$ NMR (100 MHz, $\text{CDCl}_3$ )

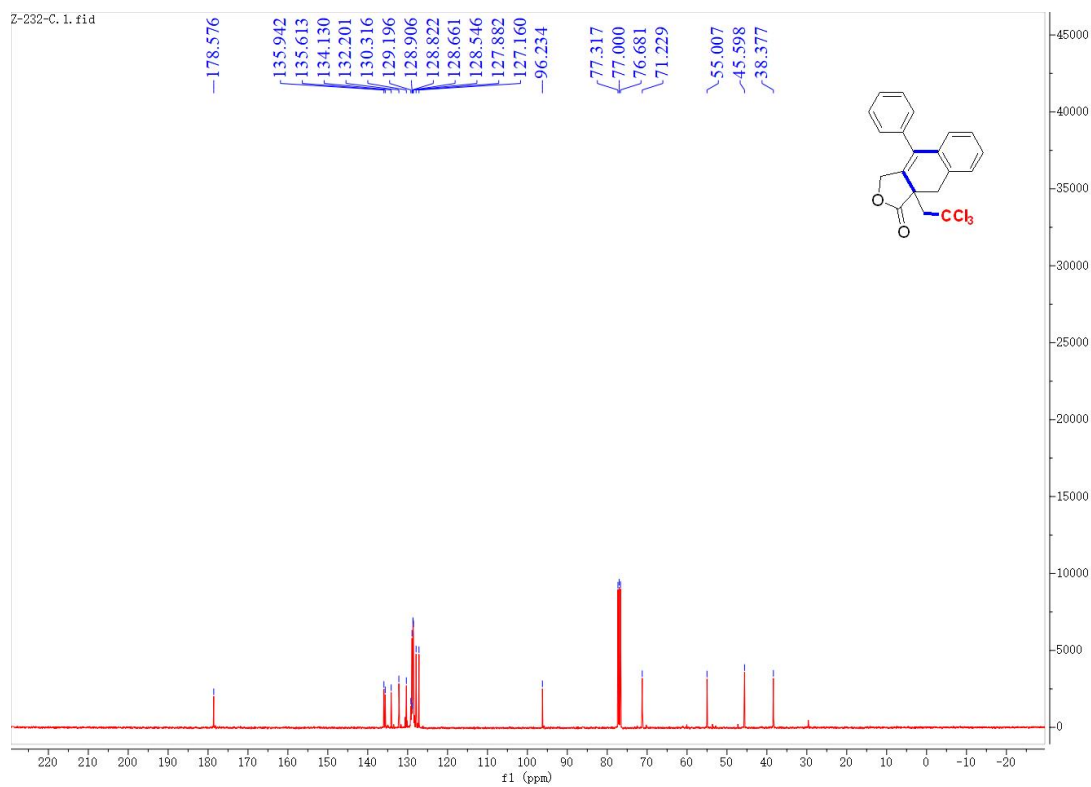

## $^2\text{-}^1\text{H}$ NMR (400 MHz, $\text{CDCl}_3$ )

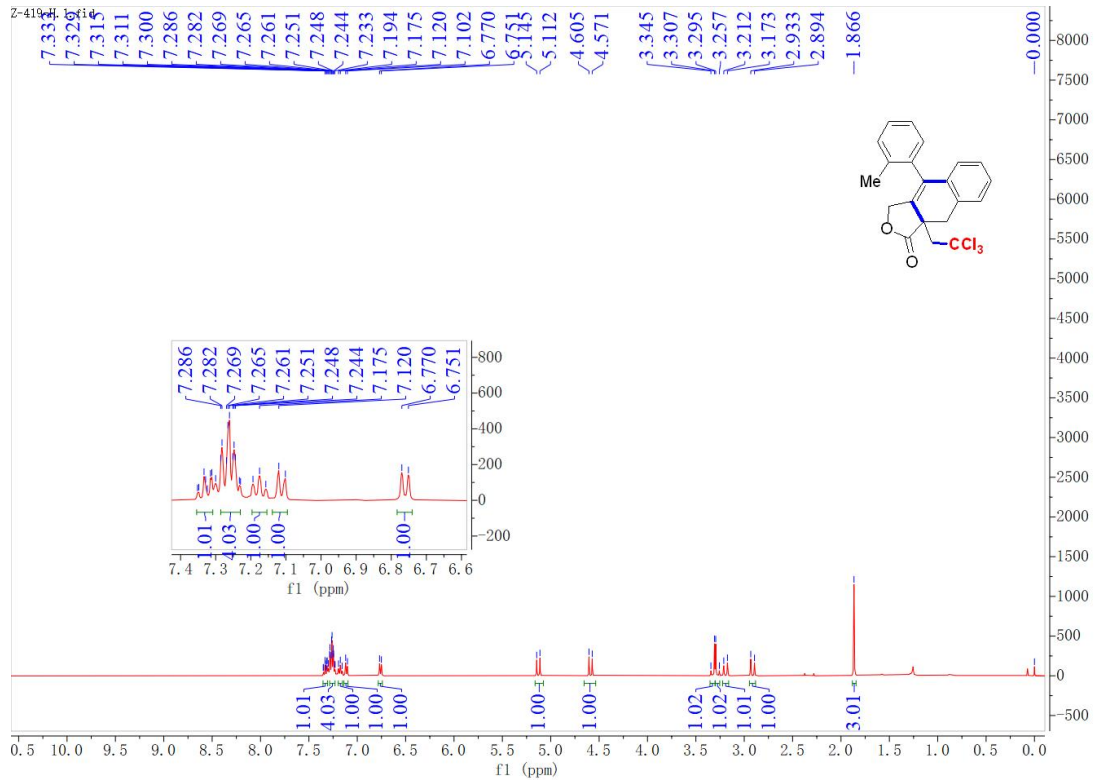

## $^2\text{-}^{13}\text{C}\{^1\text{H}\}$ NMR (150 MHz, $\text{CDCl}_3$ )

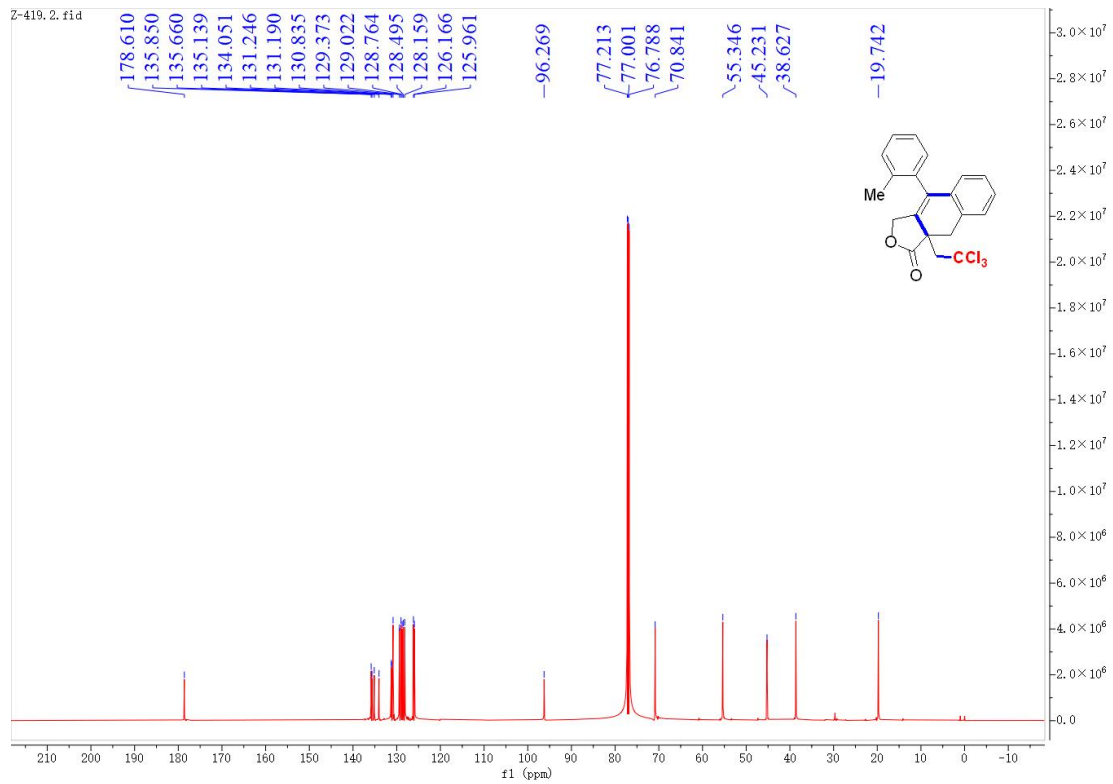

### $^3\text{-}^1\text{H}$ NMR (400 MHz, $\text{CDCl}_3$ )

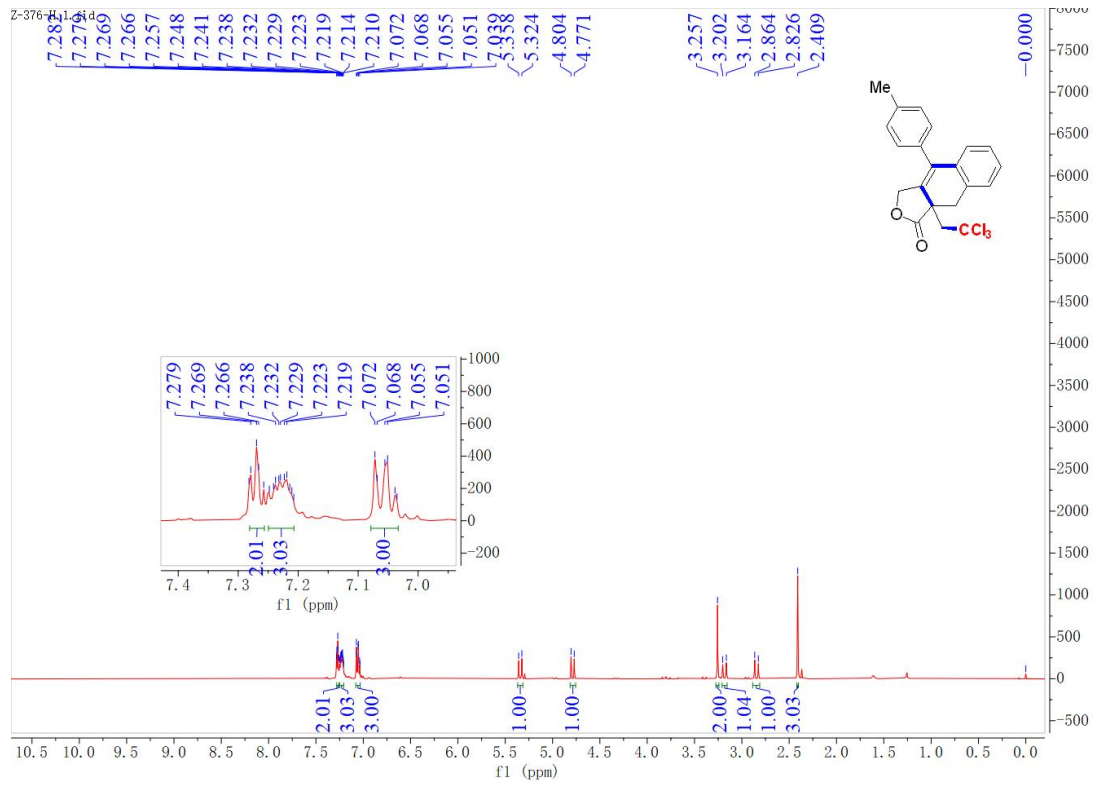

### $^3\text{-}^{13}\text{C}\{^1\text{H}\}$ NMR (100 MHz, $\text{CDCl}_3$ )

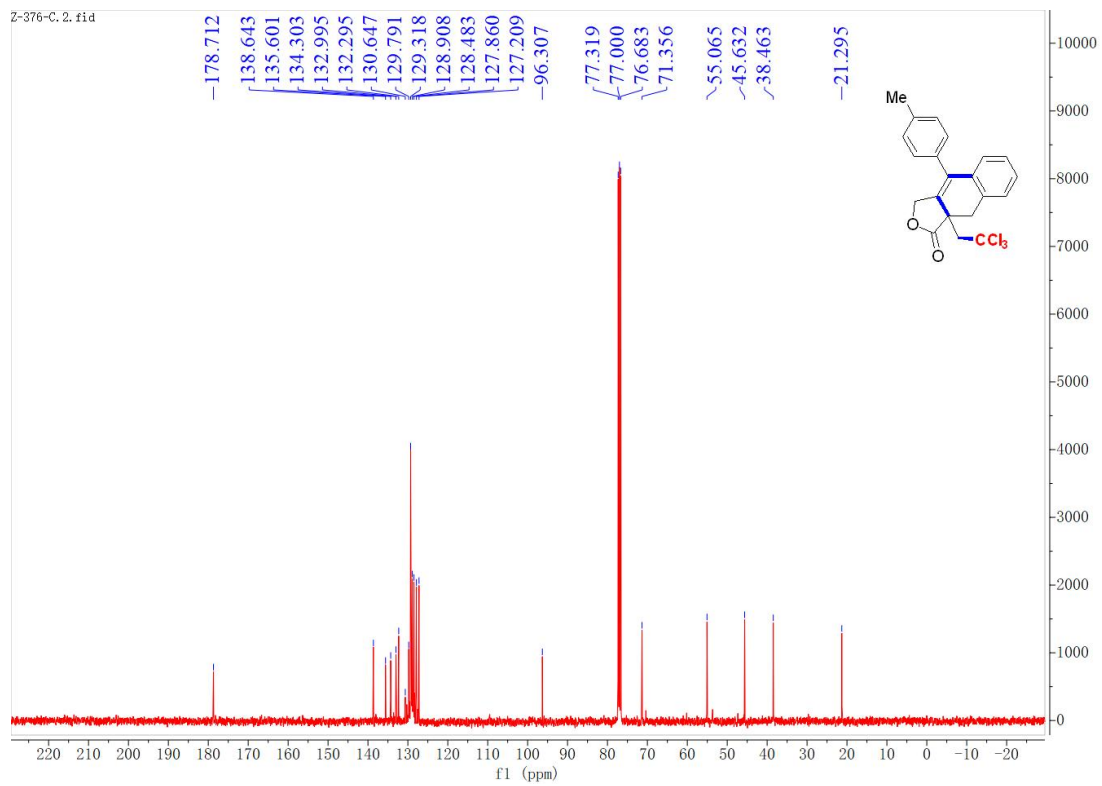

4-<sup>1</sup>H NMR (400 MHz, CDCl<sub>3</sub>)

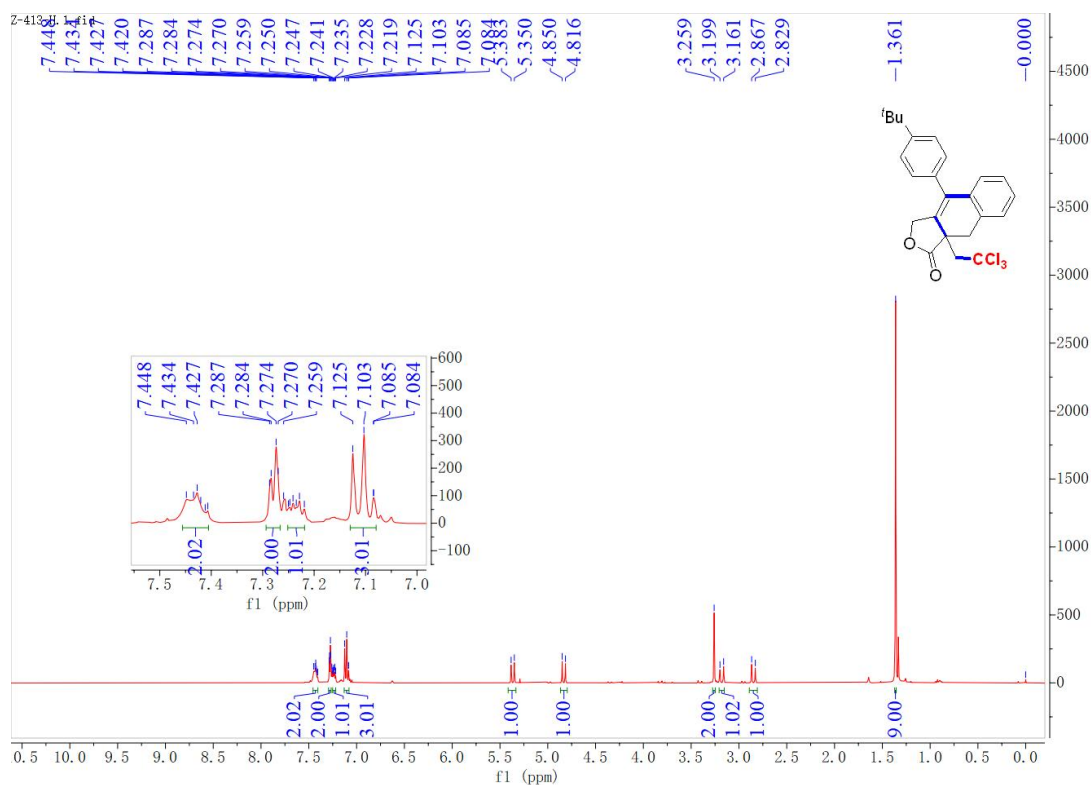

4-<sup>13</sup>C{<sup>1</sup>H} NMR (100 MHz, CDCl<sub>3</sub>)

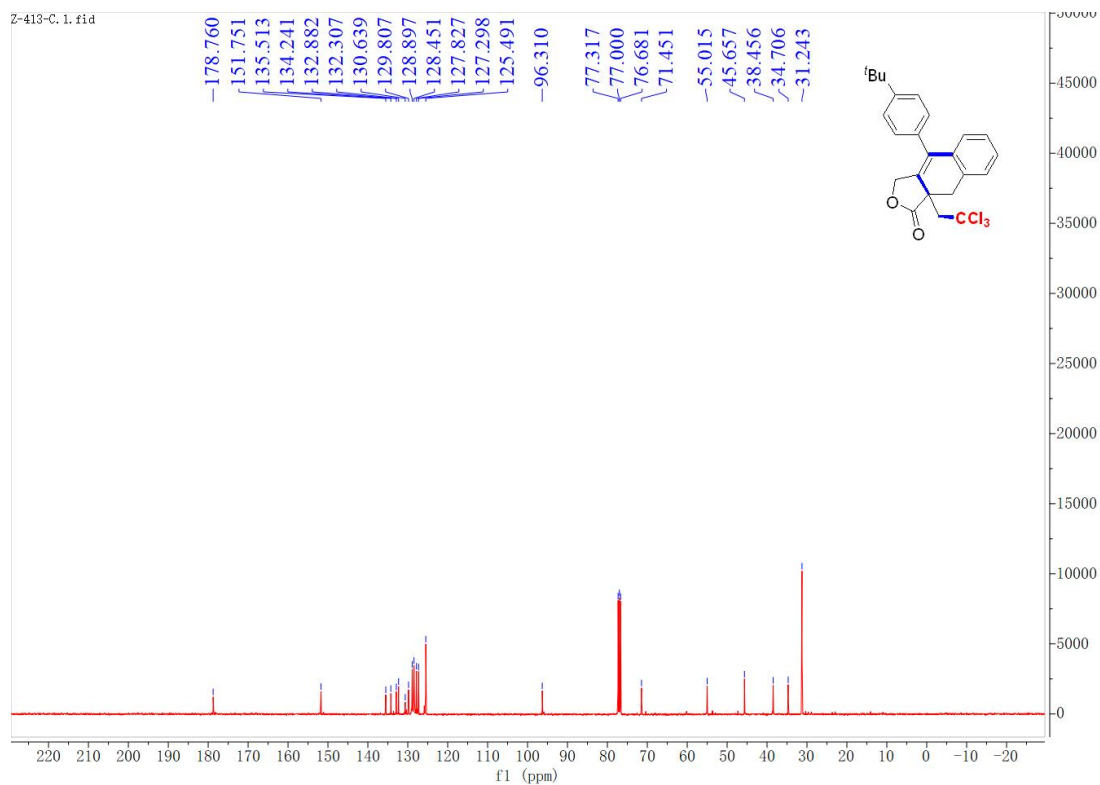



### 5-<sup>1</sup>H NMR (400 MHz, CDCl<sub>3</sub>)

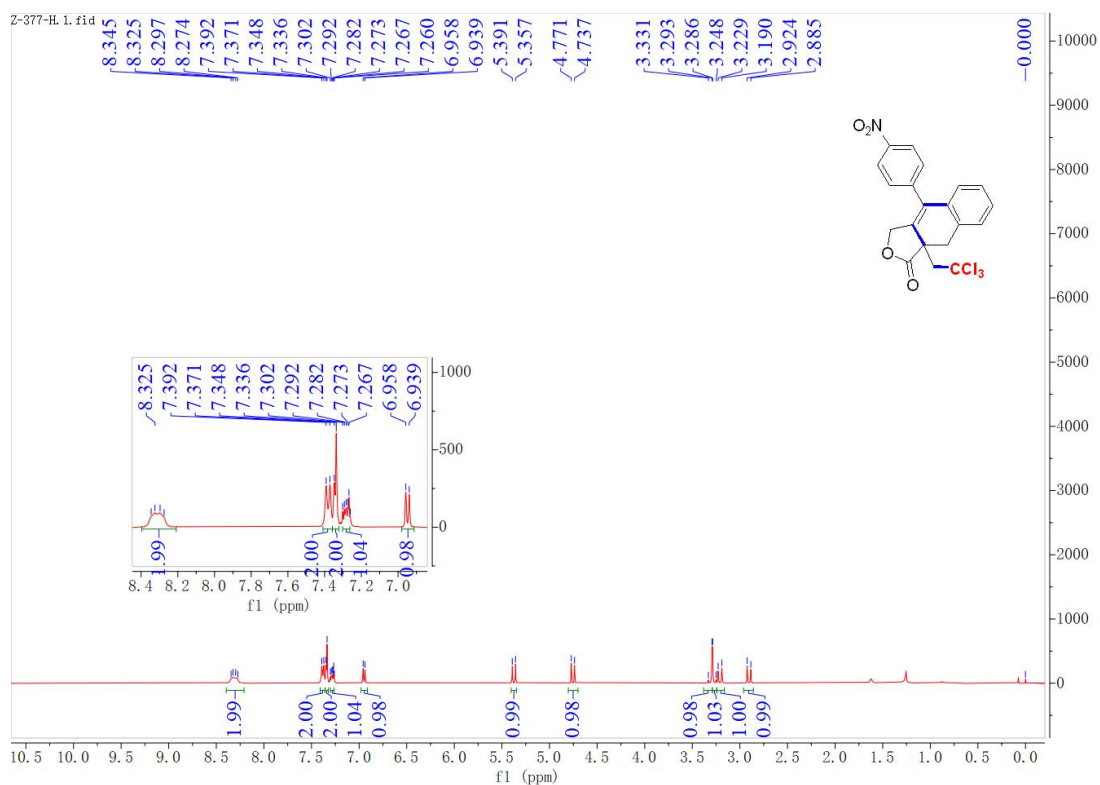

### 5-<sup>13</sup>C{<sup>1</sup>H} NMR (100 MHz, CDCl<sub>3</sub>)

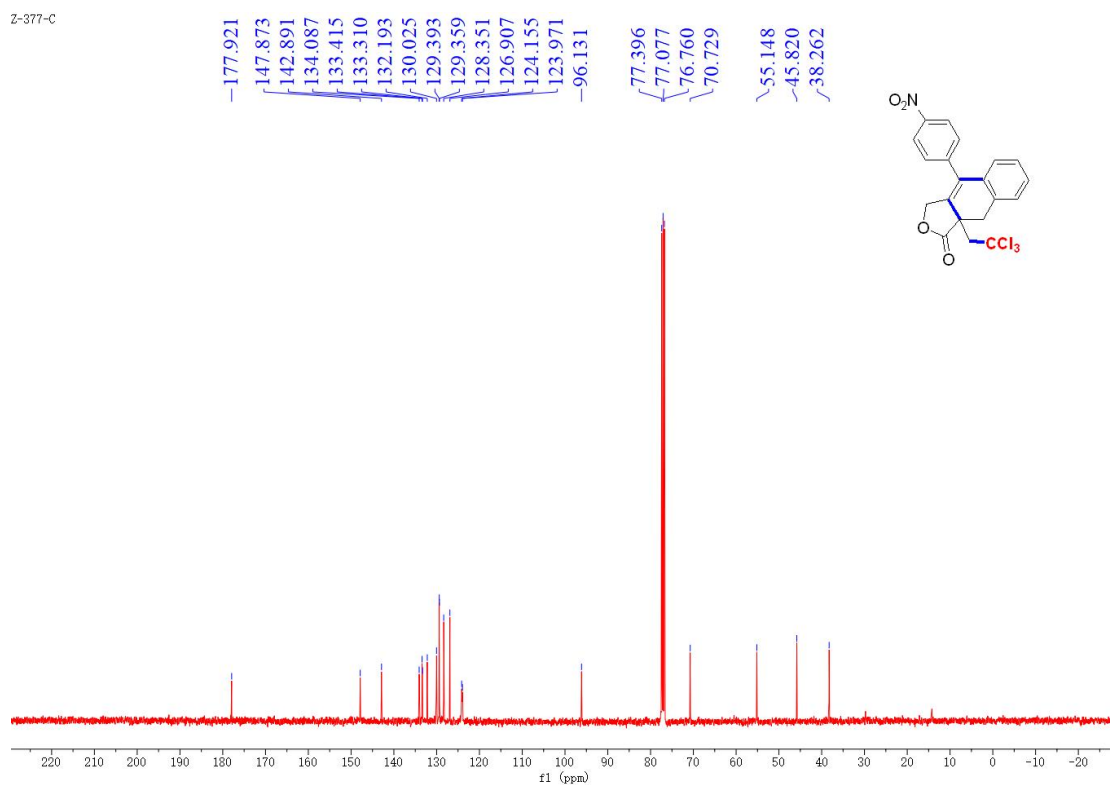

**6-<sup>1</sup>H NMR (400 MHz, CDCl<sub>3</sub>)**

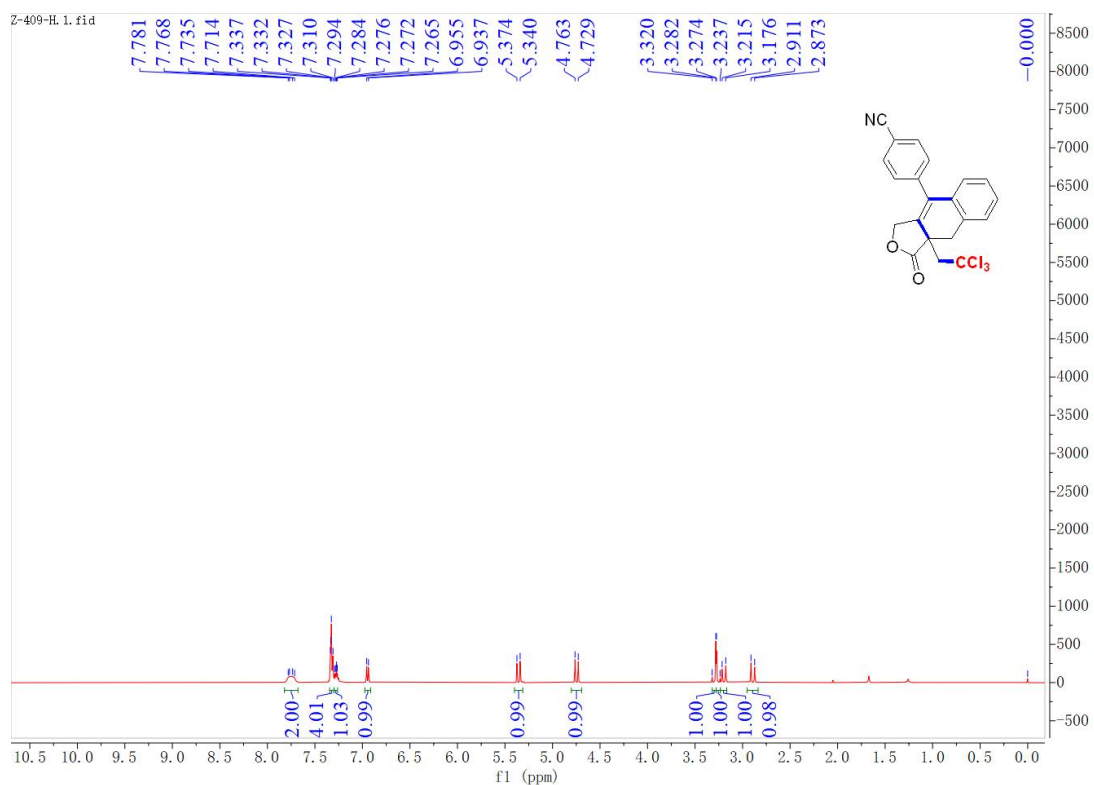

**6-<sup>13</sup>C{<sup>1</sup>H} NMR (100 MHz, CDCl<sub>3</sub>)**

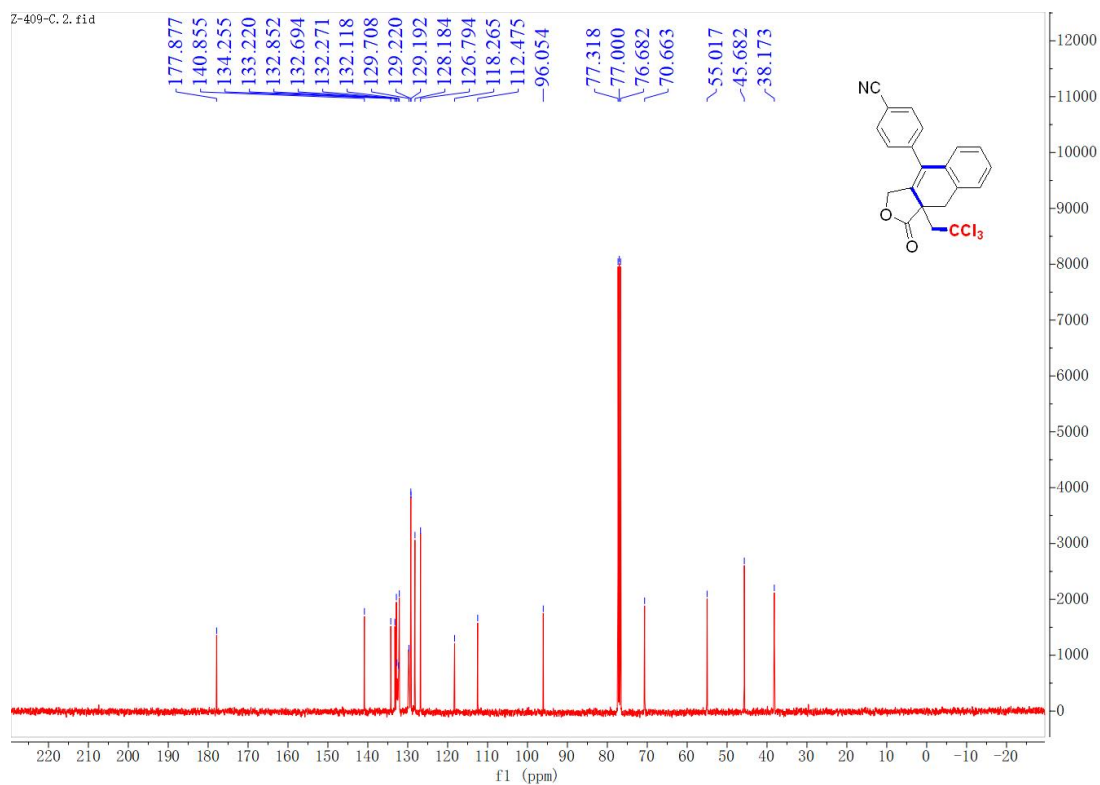

### 7-<sup>1</sup>H NMR (400 MHz, CDCl<sub>3</sub>)

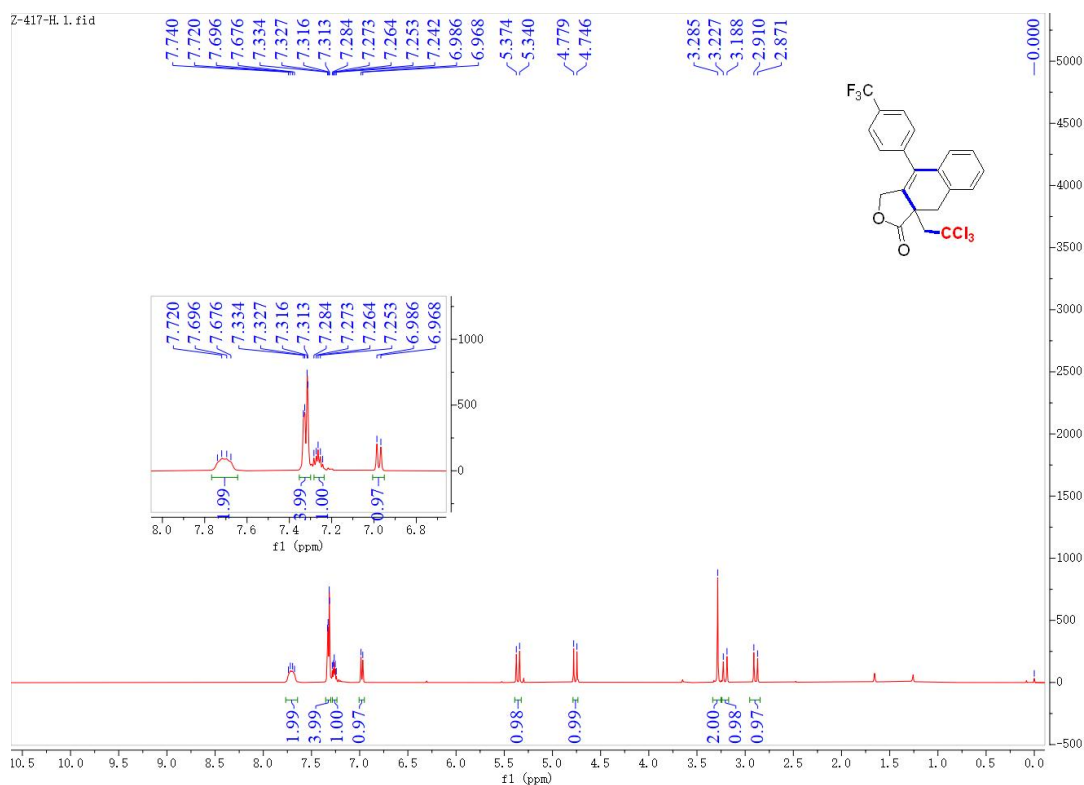

### 7-<sup>13</sup>C{<sup>1</sup>H} NMR (100 MHz, CDCl<sub>3</sub>)

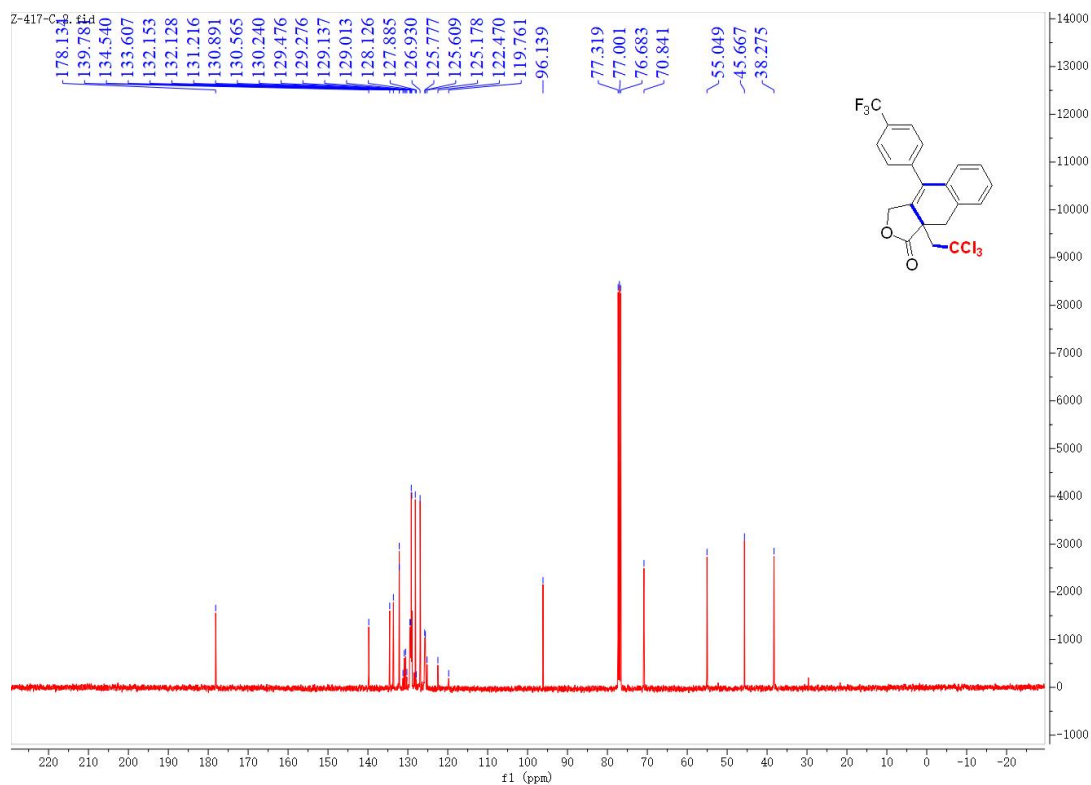

### 7-<sup>19</sup>F NMR (565 MHz, CDCl<sub>3</sub>)

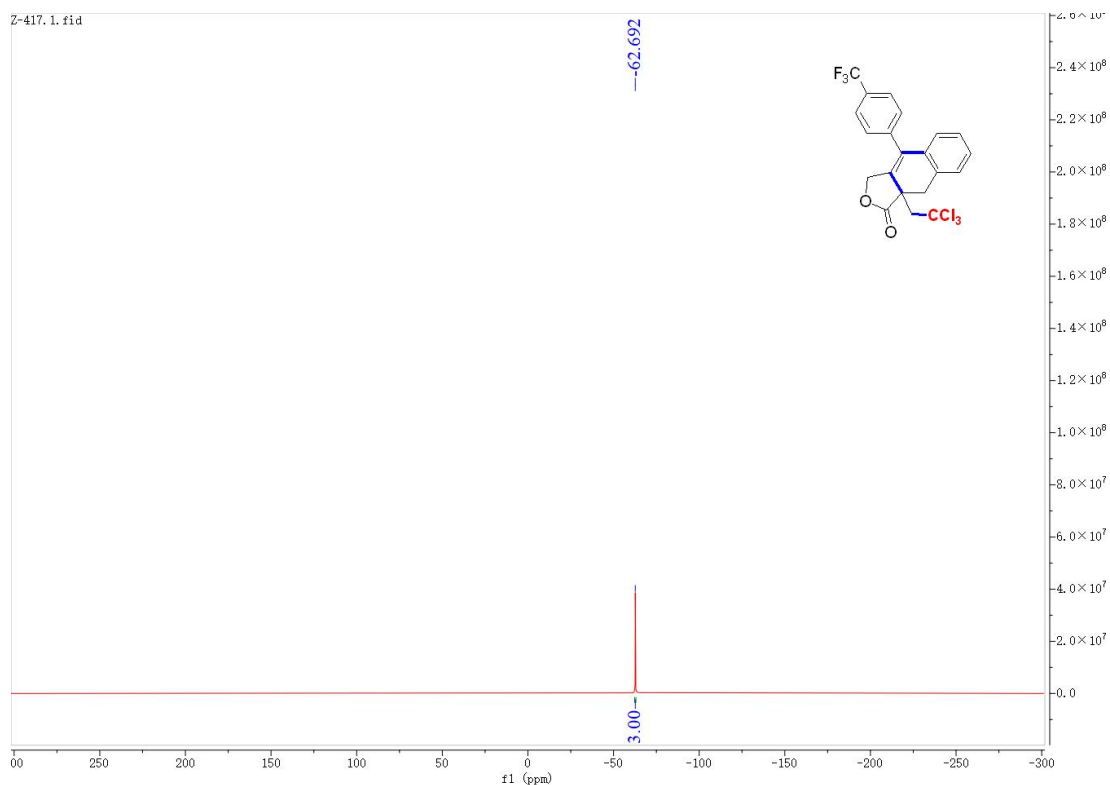

### 8-<sup>1</sup>H NMR (600 MHz, CDCl<sub>3</sub>)

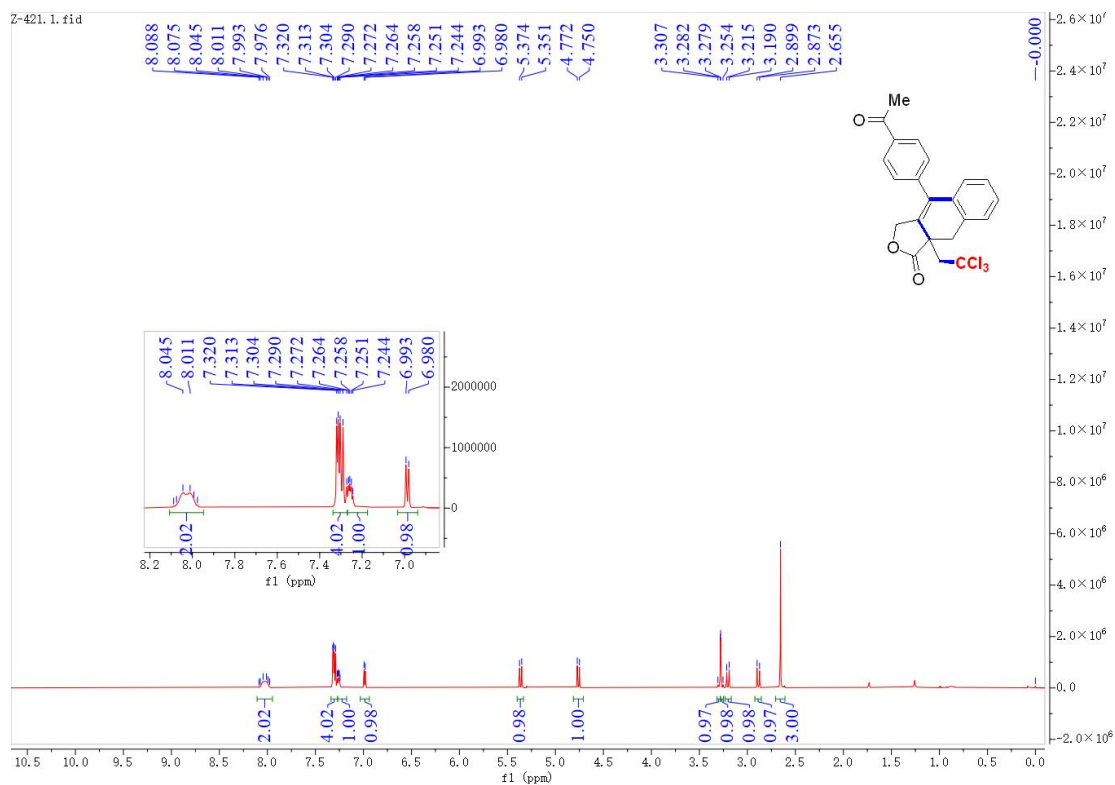

**8-<sup>13</sup>C{<sup>1</sup>H} NMR (150 MHz, CDCl<sub>3</sub>)**

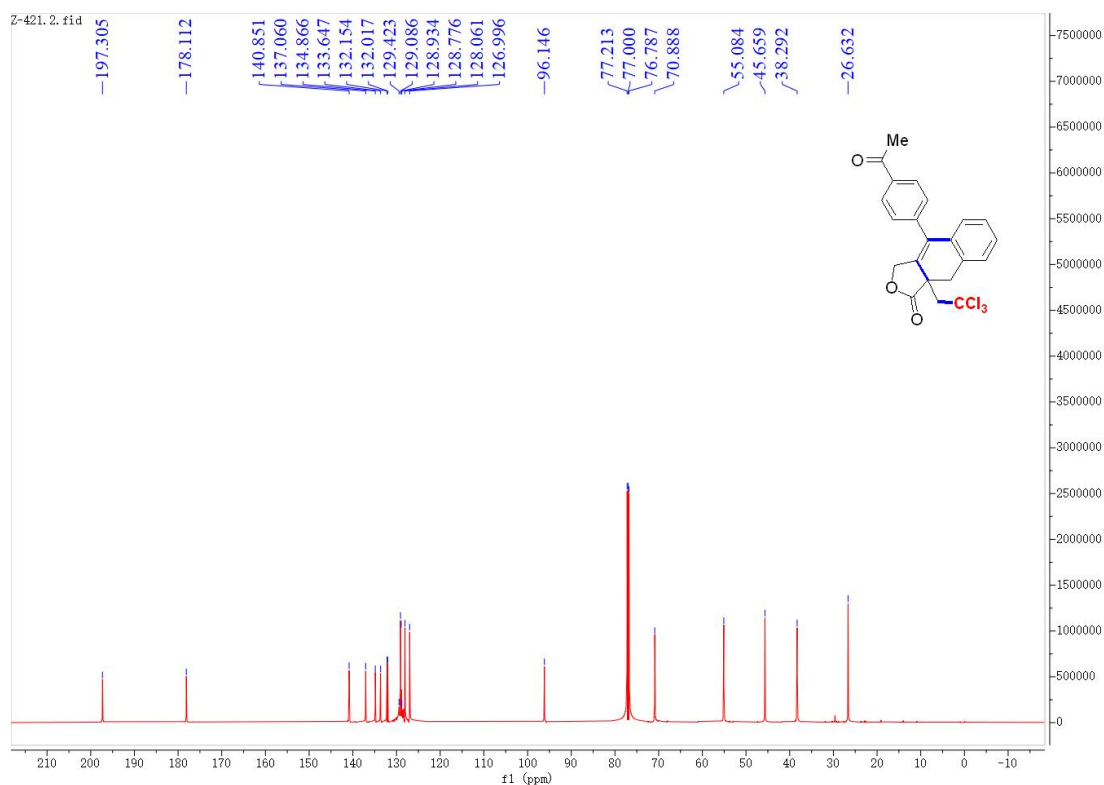

**9-<sup>1</sup>H NMR (600 MHz, CDCl<sub>3</sub>)**

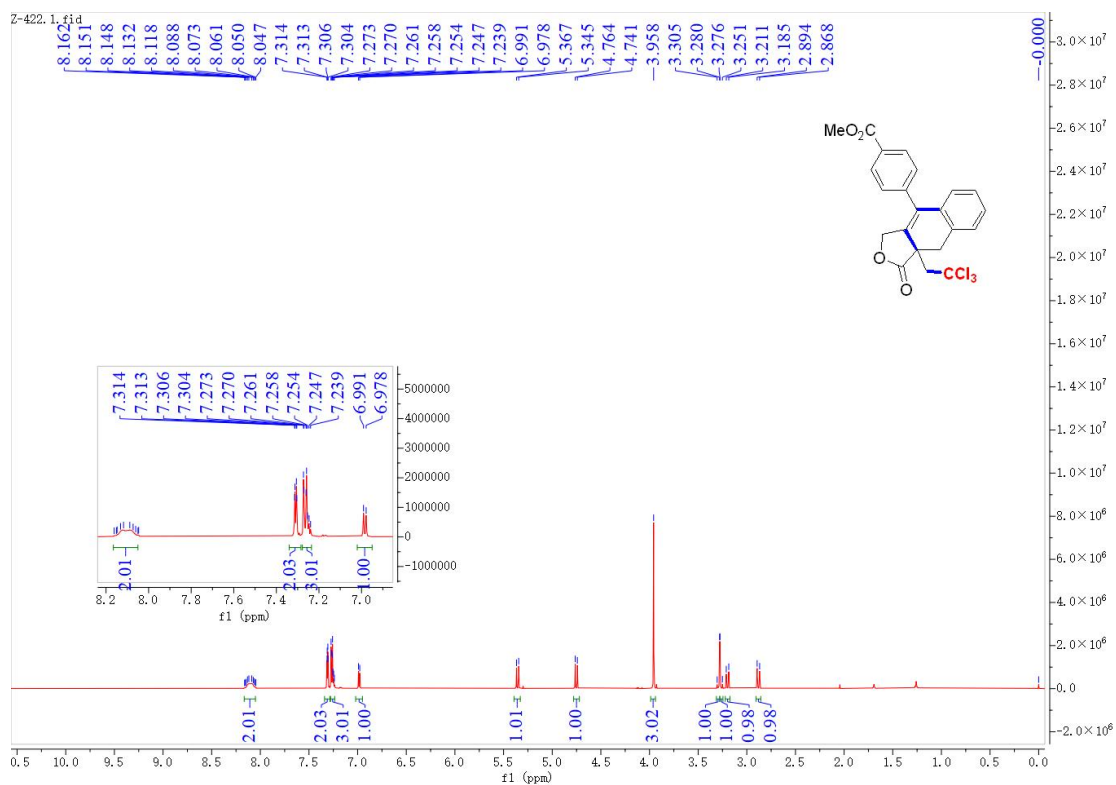

### 9-<sup>13</sup>C{<sup>1</sup>H} NMR (150 MHz, CDCl<sub>3</sub>)

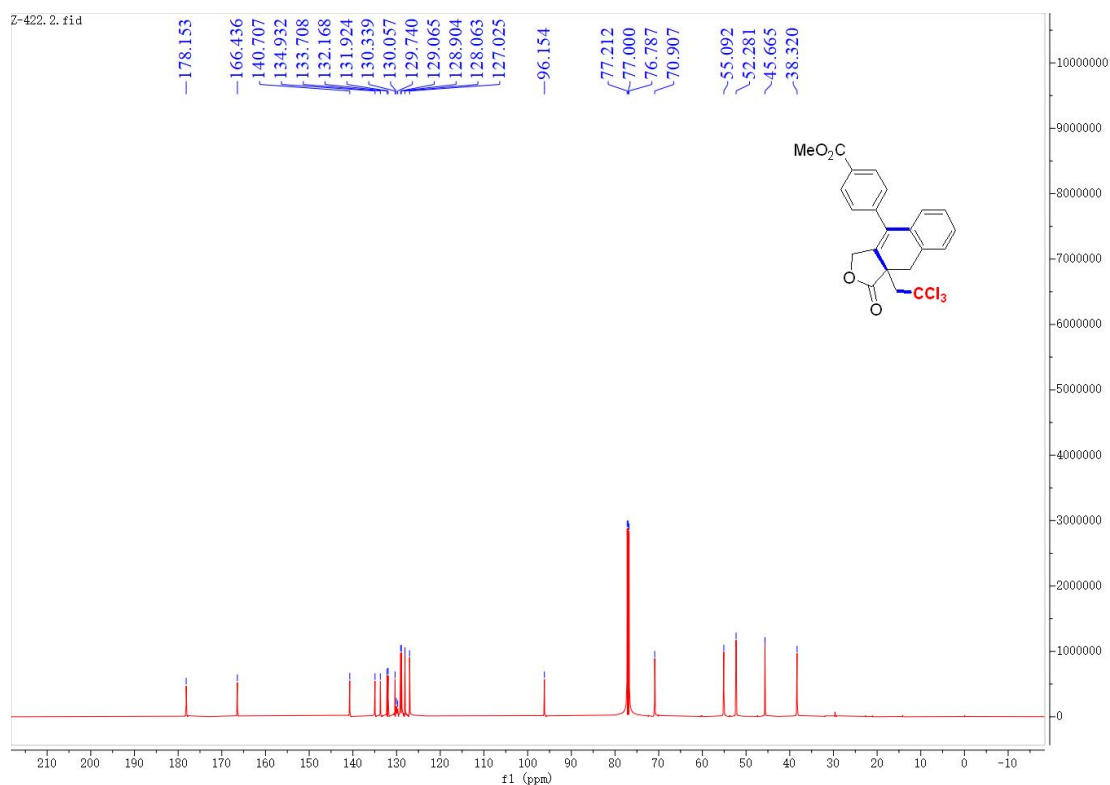

### 10-<sup>1</sup>H NMR (600 MHz, CDCl<sub>3</sub>)

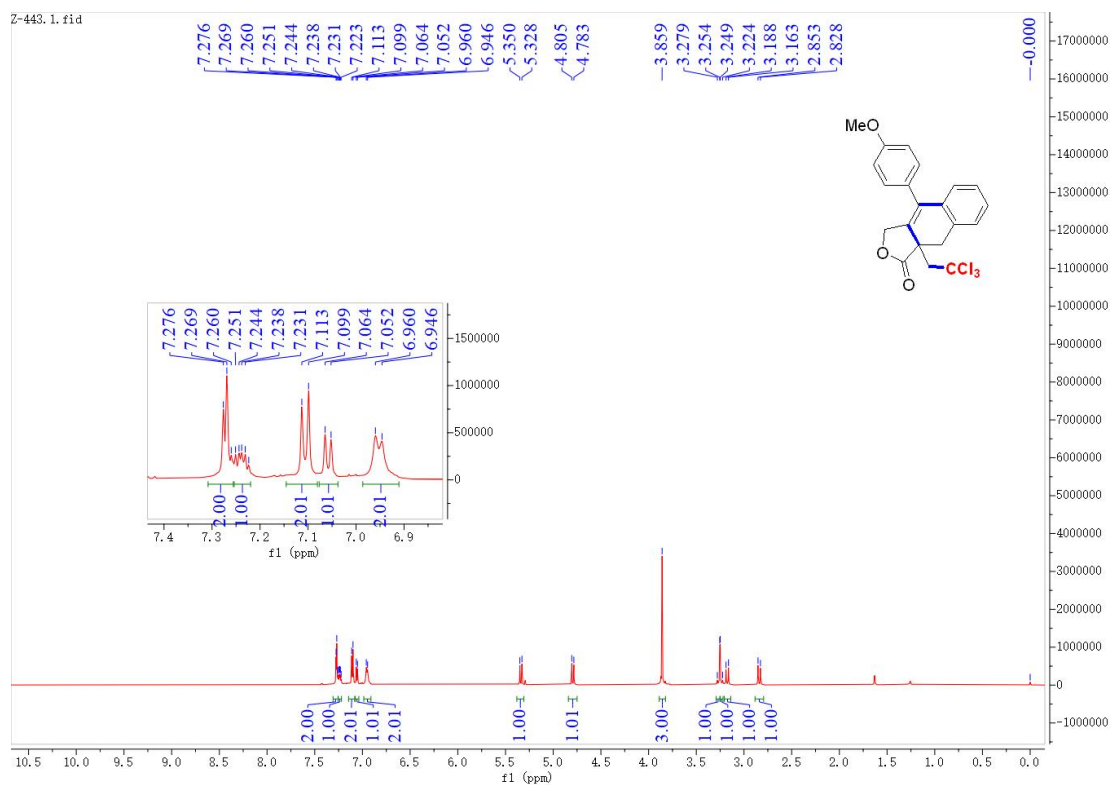

### 10-<sup>13</sup>C{<sup>1</sup>H} NMR (150 MHz, CDCl<sub>3</sub>)

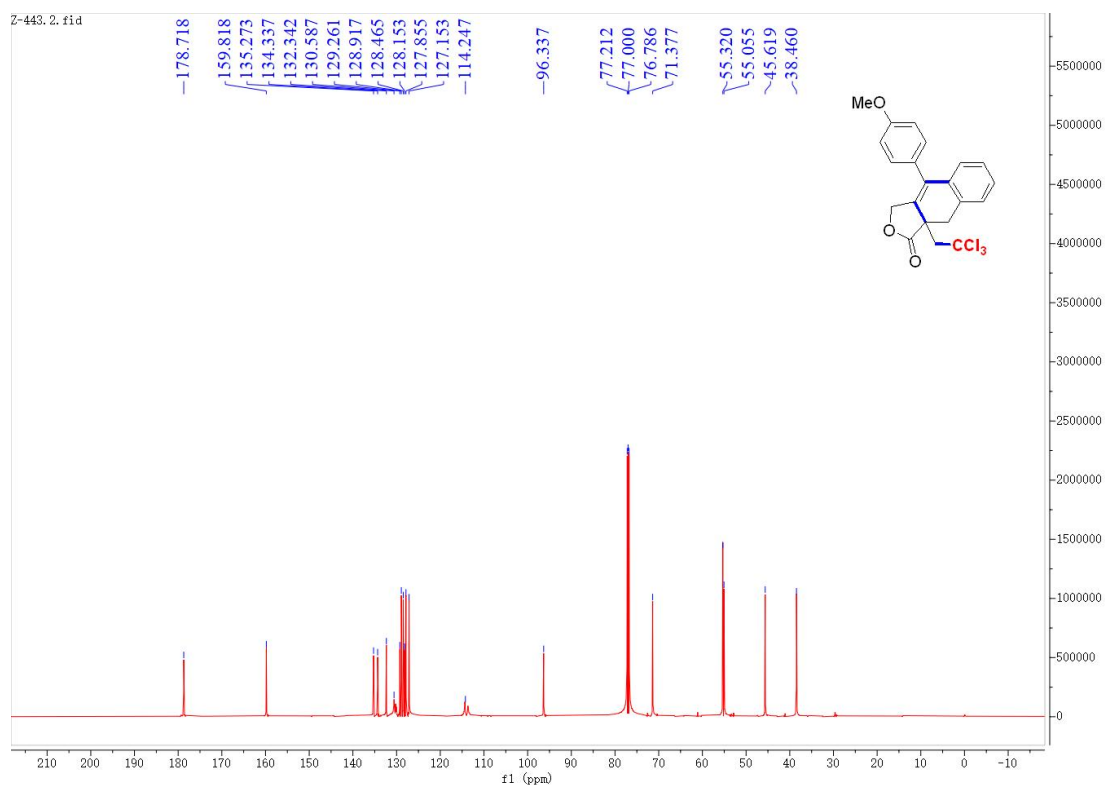

### 11-<sup>1</sup>H NMR (400 MHz, CDCl<sub>3</sub>)

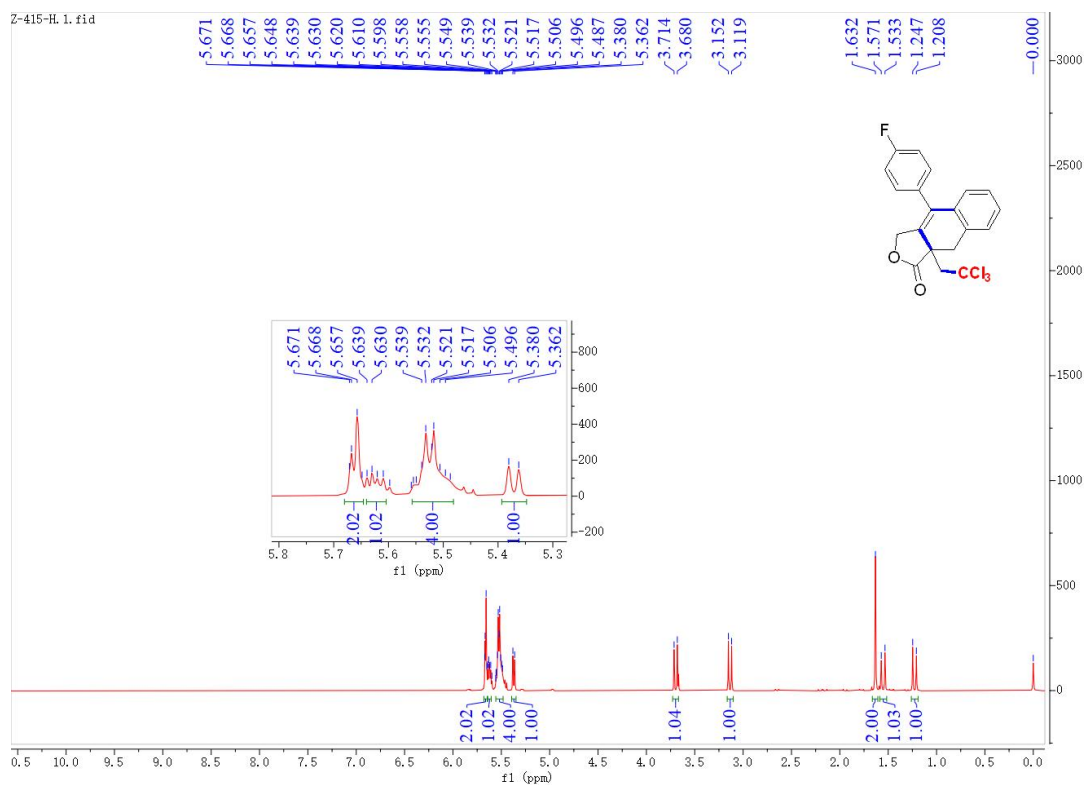

# 11-<sup>13</sup>C{<sup>1</sup>H} NMR (100 MHz, CDCl<sub>3</sub>)

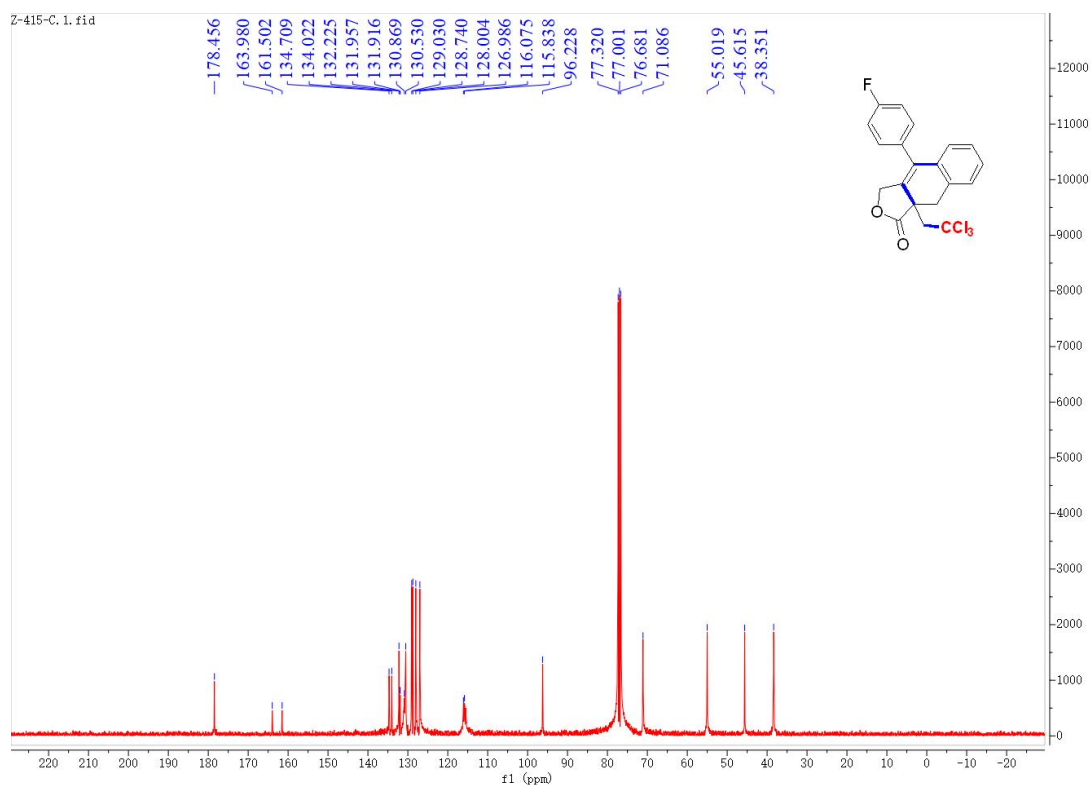

# 11-<sup>19</sup>F NMR (565 MHz, CDCl<sub>3</sub>)

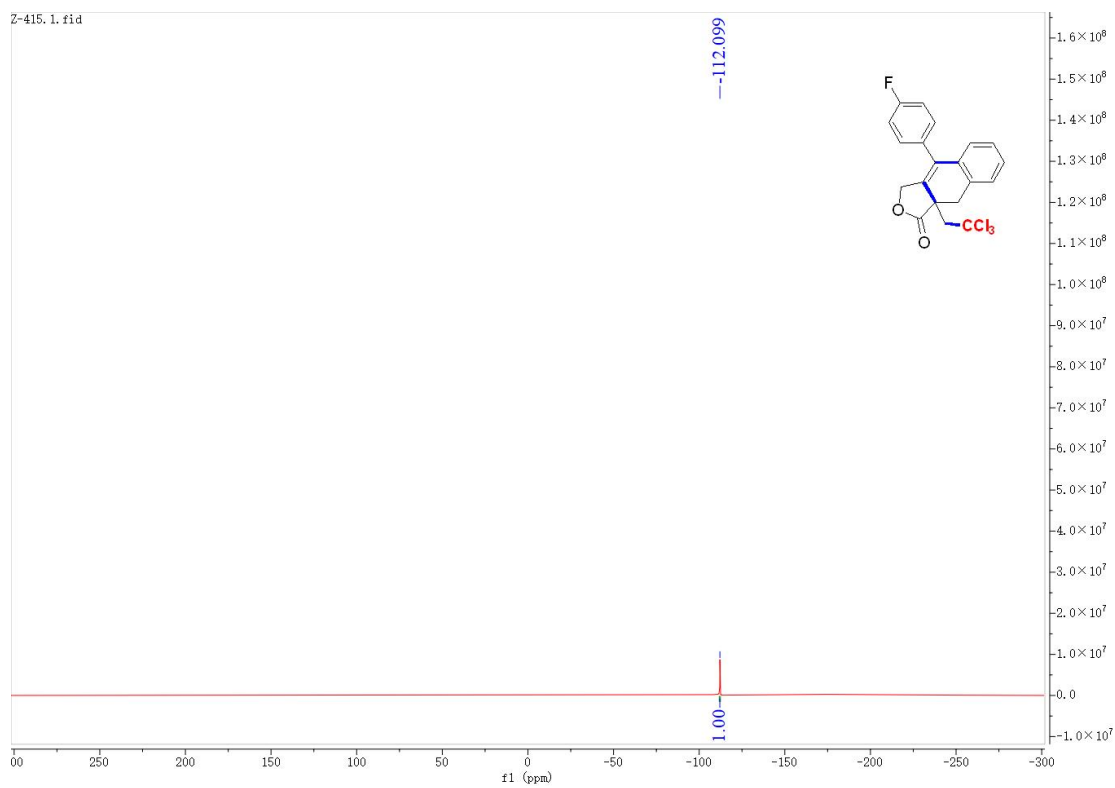



## 12-<sup>1</sup>H NMR (400 MHz, CDCl<sub>3</sub>)

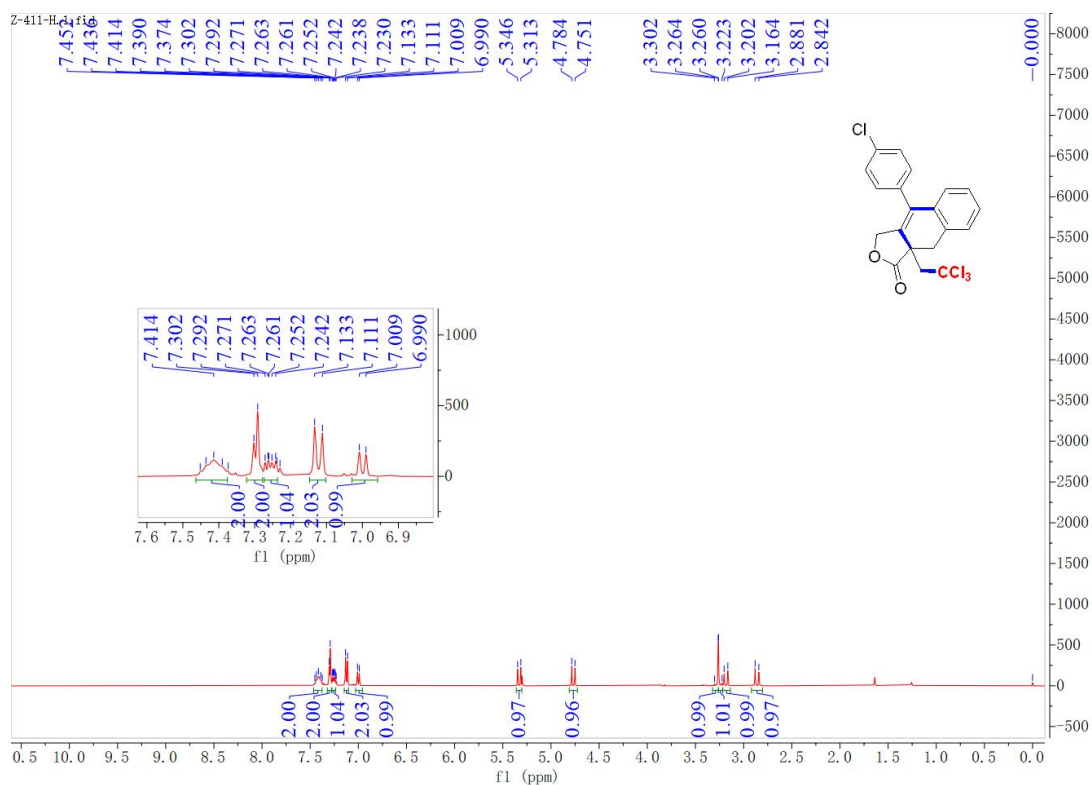

## 12-<sup>13</sup>C{<sup>1</sup>H} NMR (100 MHz, CDCl<sub>3</sub>)

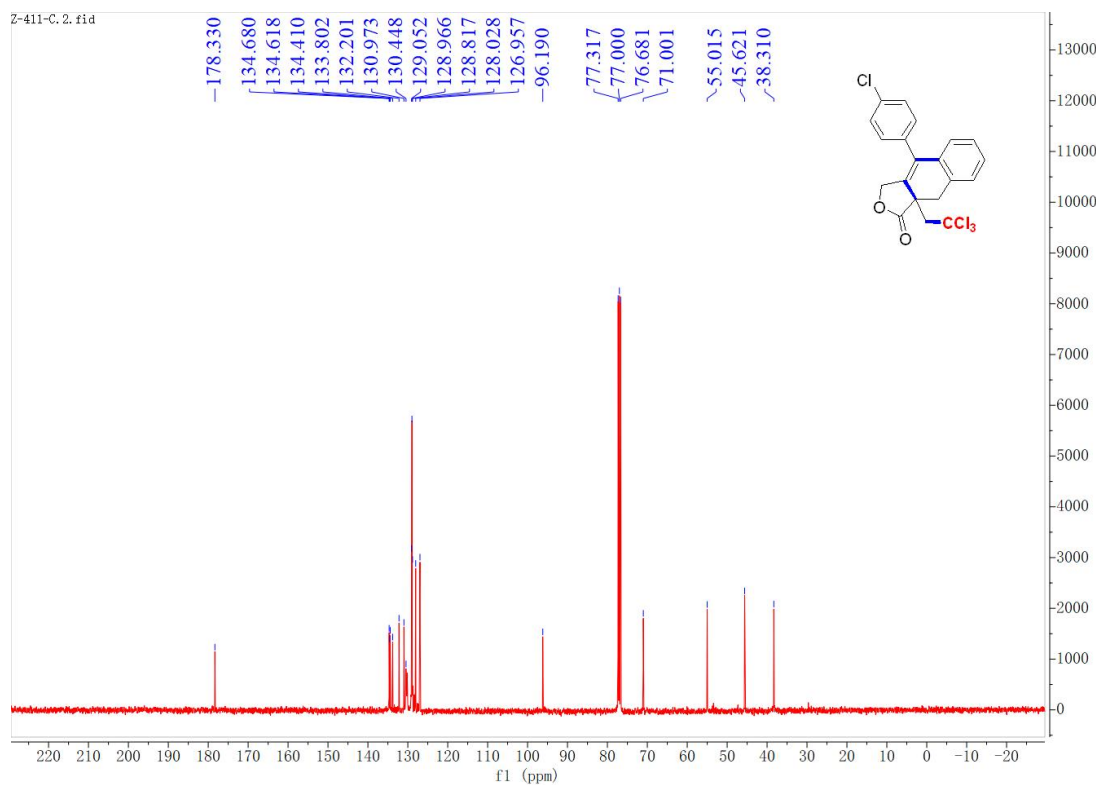

### 13-<sup>1</sup>H NMR (600 MHz, CDCl<sub>3</sub>)

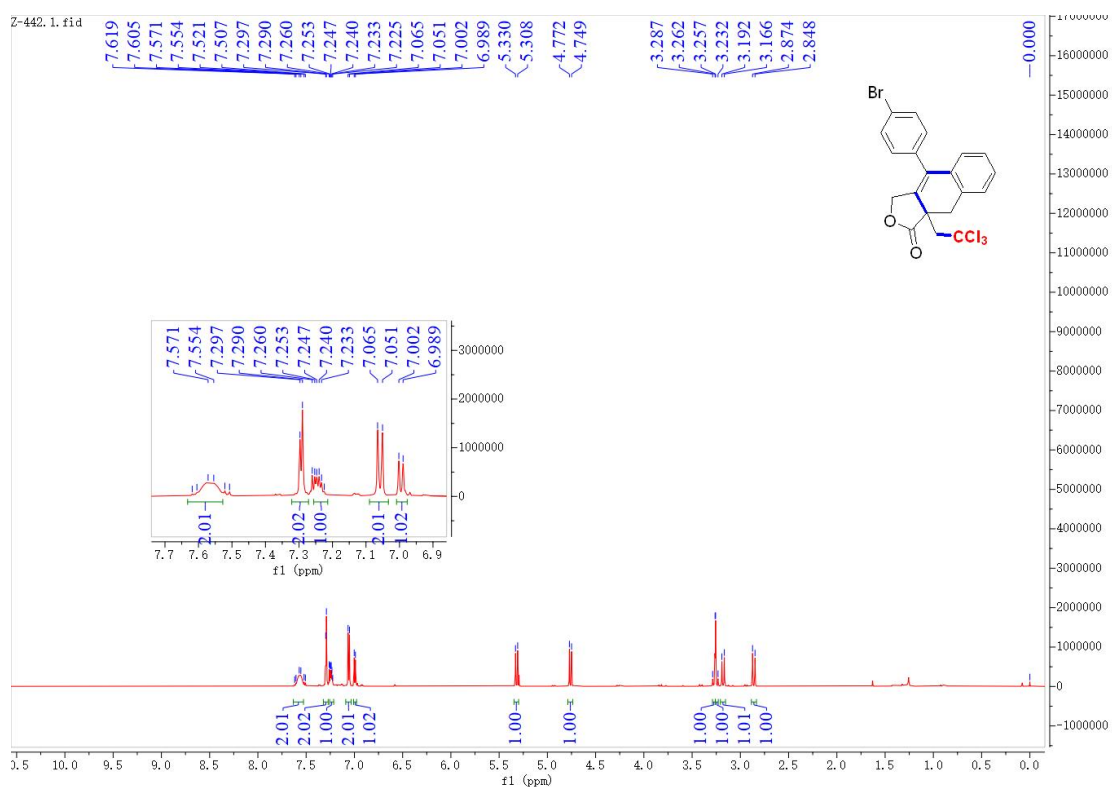

### 13-<sup>13</sup>C {<sup>1</sup>H} NMR (150 MHz, CDCl<sub>3</sub>)

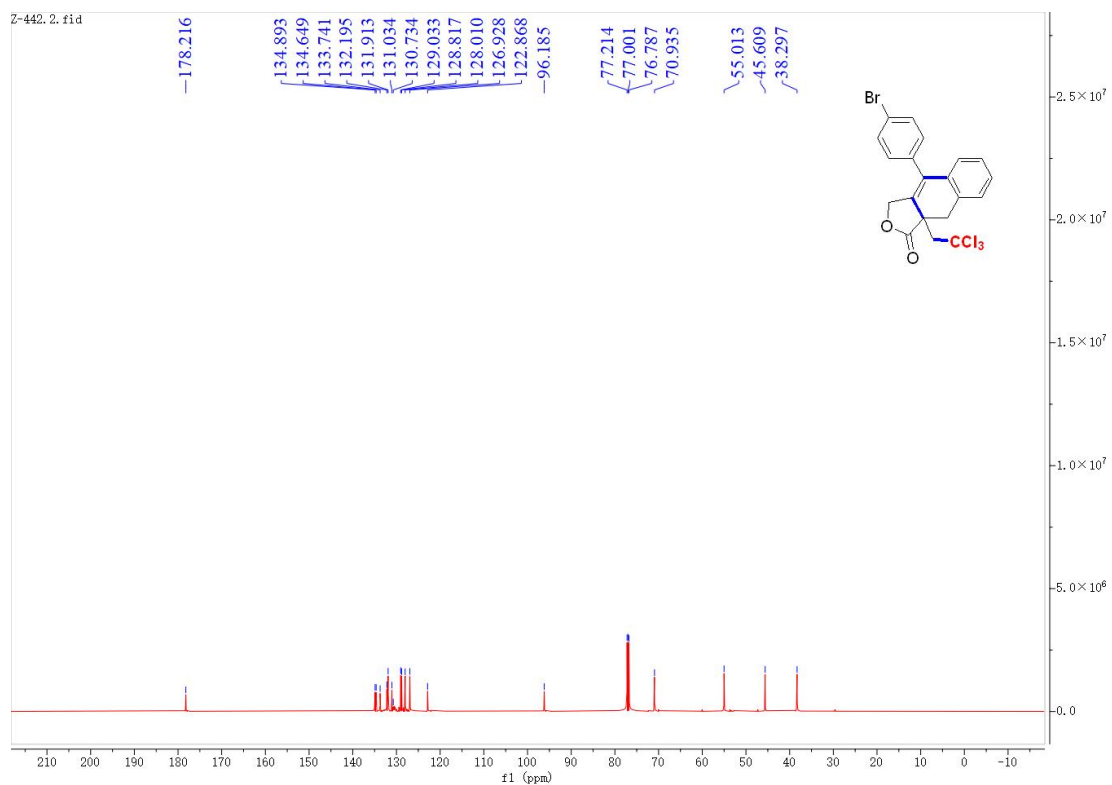

14-<sup>1</sup>H NMR (600 MHz, CDCl<sub>3</sub>)

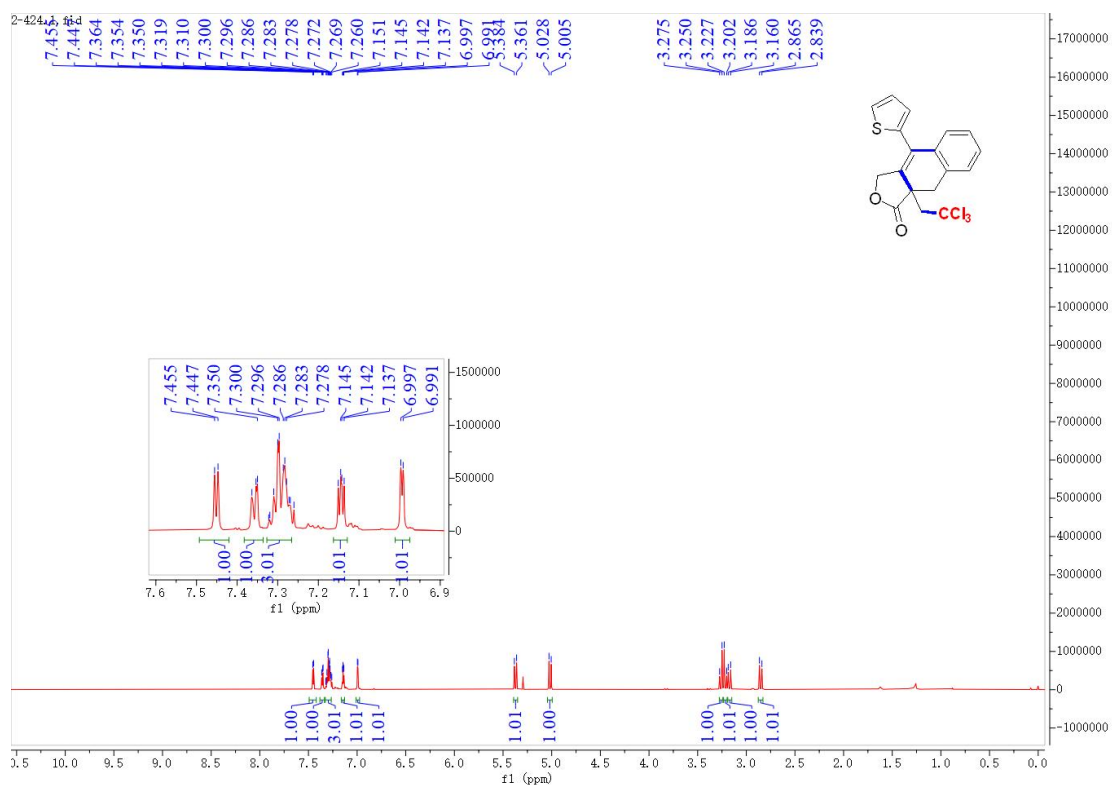

14-<sup>13</sup>C {<sup>1</sup>H} NMR (150 MHz, CDCl<sub>3</sub>)

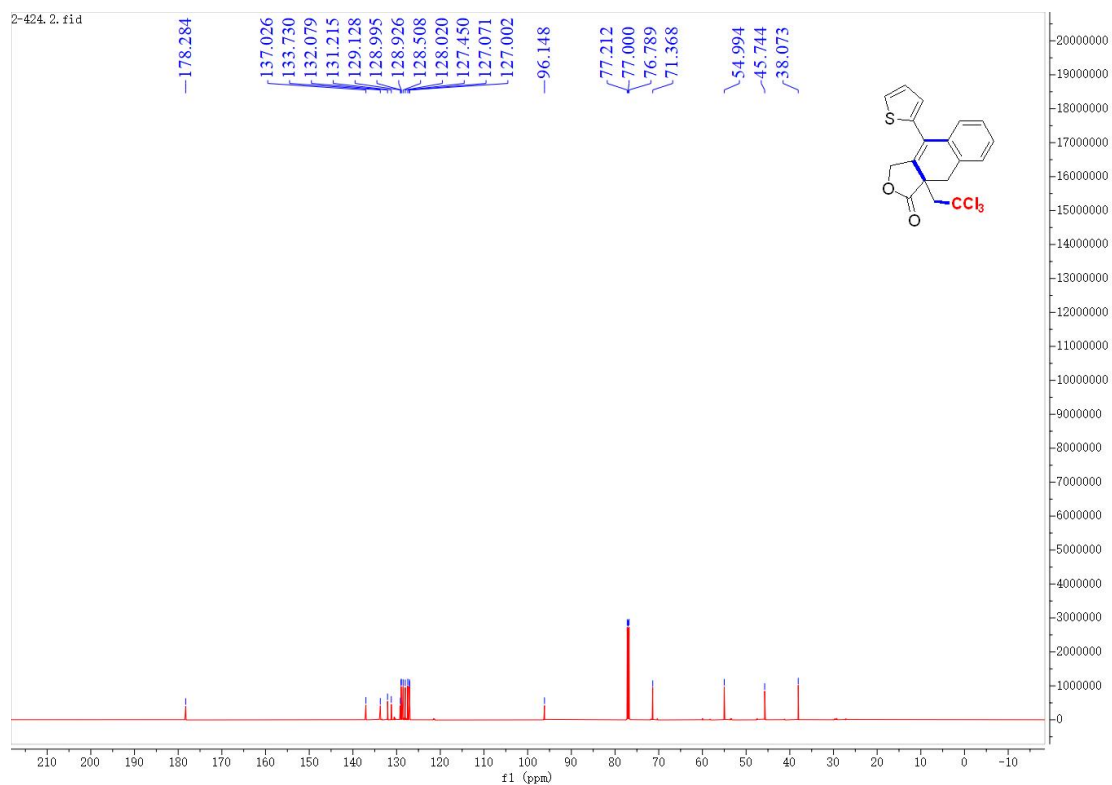

### 15-<sup>1</sup>H NMR (600 MHz, CDCl<sub>3</sub>)

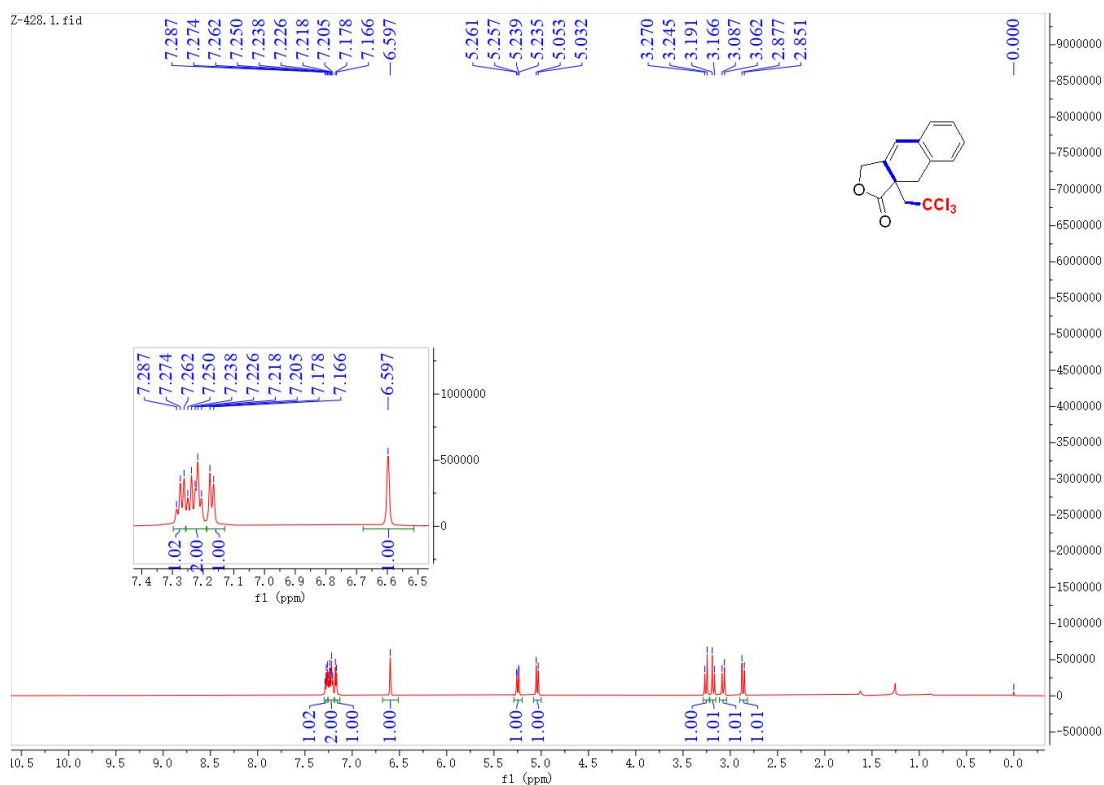

### 15-<sup>13</sup>C{<sup>1</sup>H} NMR (150 MHz, CDCl<sub>3</sub>)

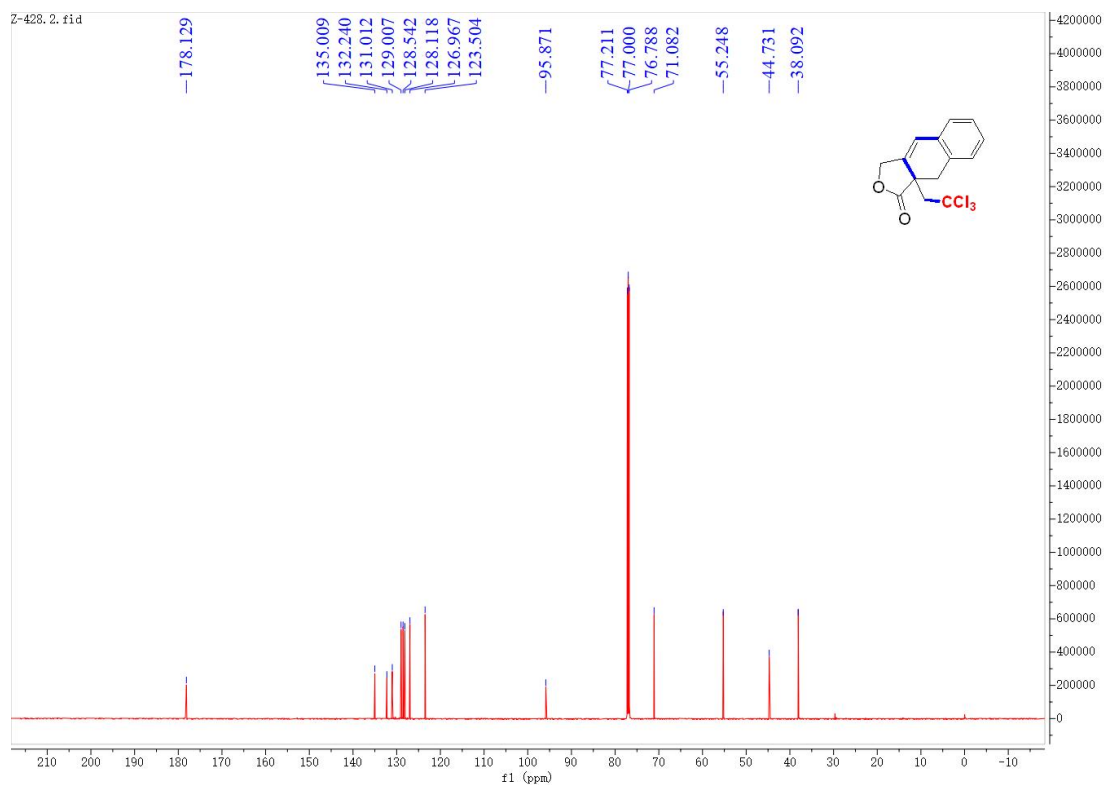

**16-<sup>1</sup>H NMR (600 MHz, CDCl<sub>3</sub>)**

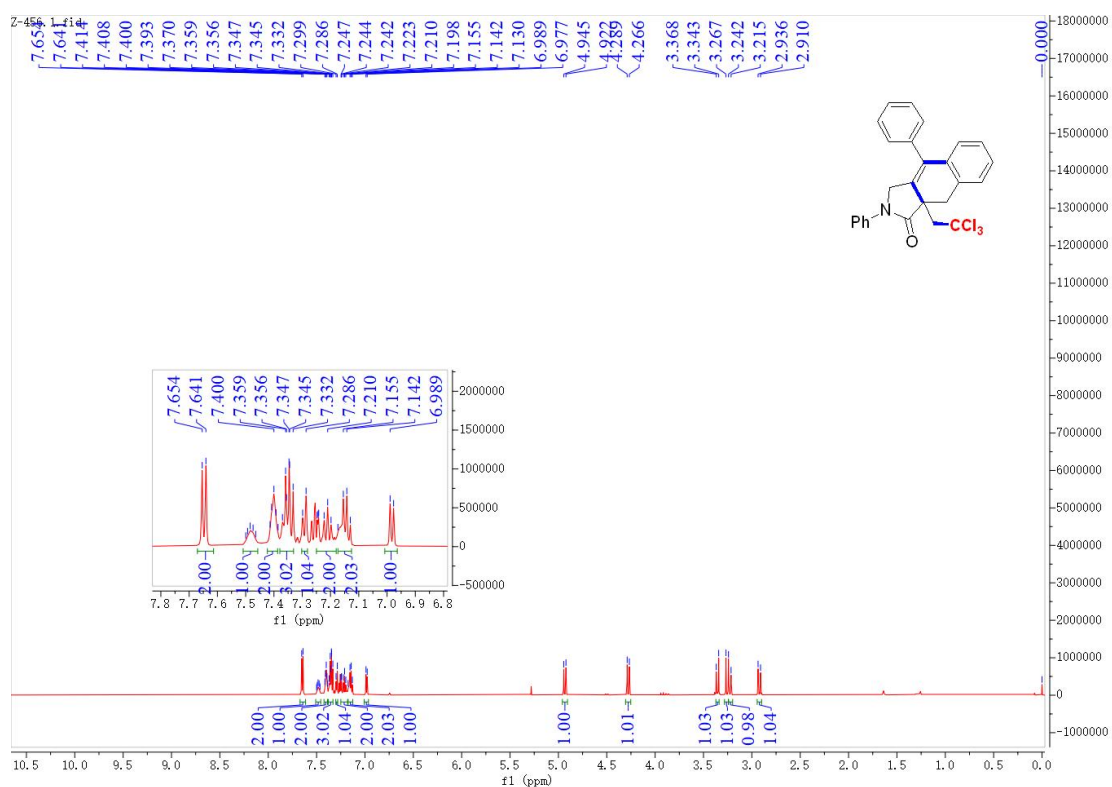

**16-<sup>13</sup>C {<sup>1</sup>H} NMR (150 MHz, CDCl<sub>3</sub>)**

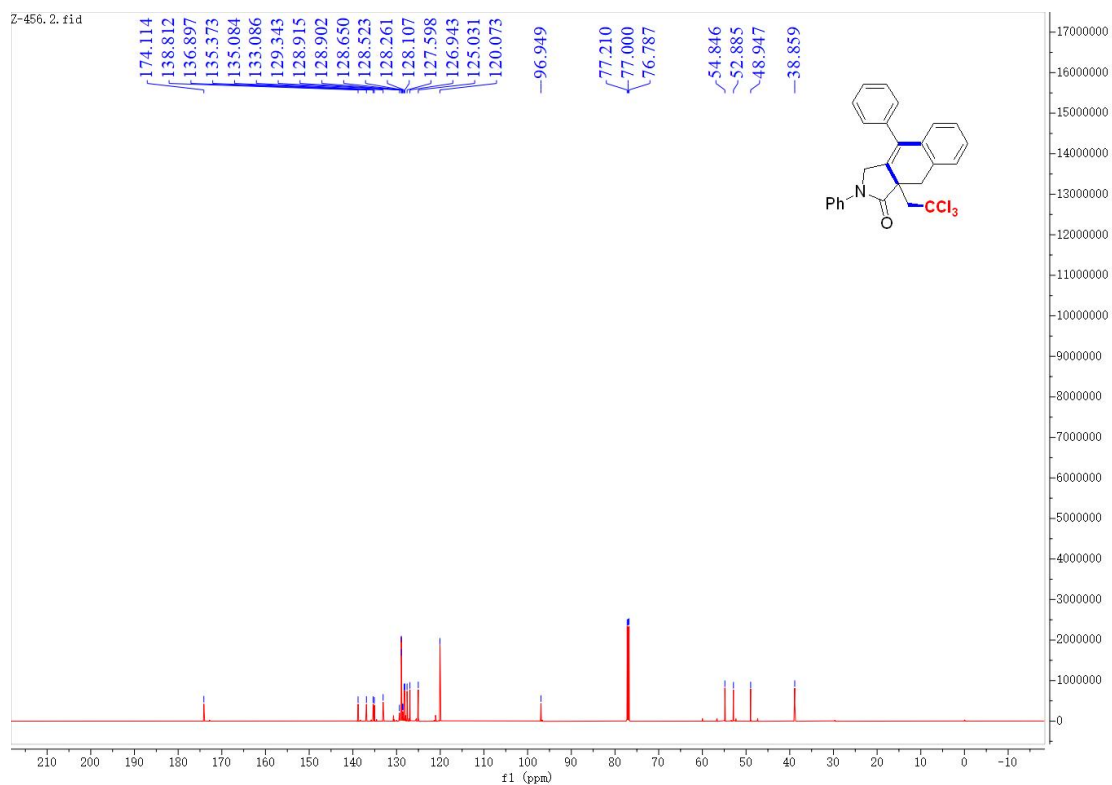

17-<sup>1</sup>H NMR (600 MHz, CDCl<sub>3</sub>)

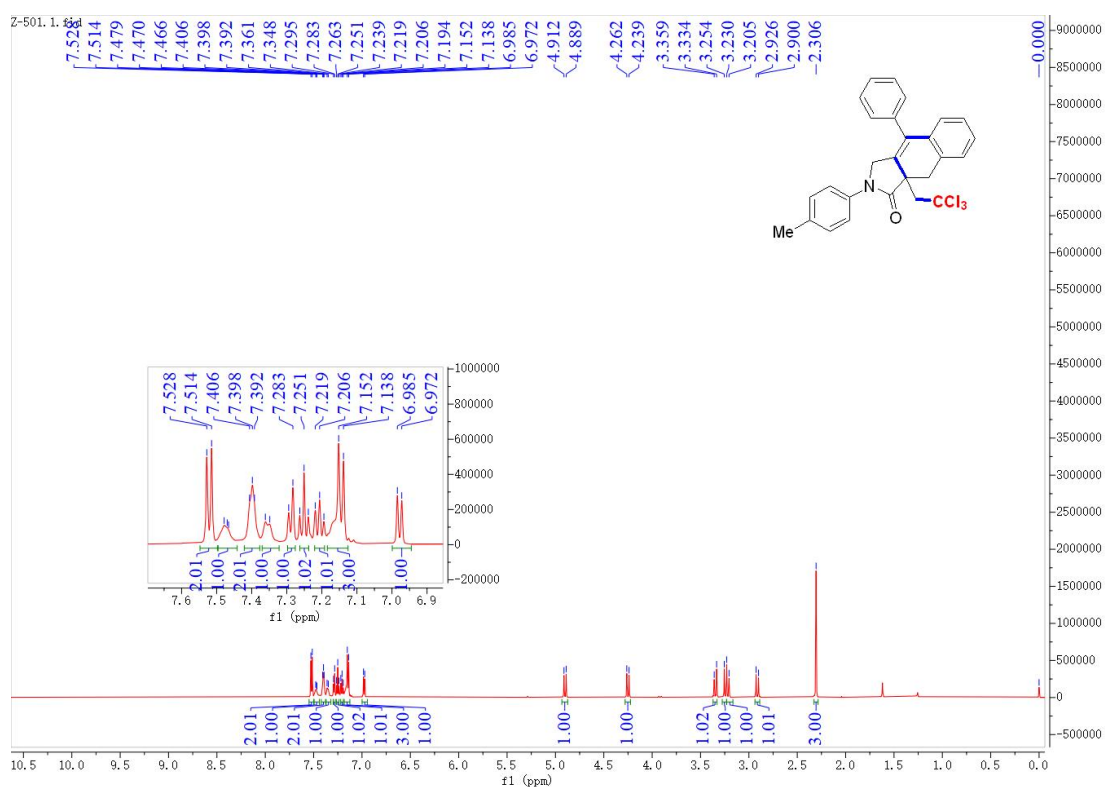

17-<sup>13</sup>C {<sup>1</sup>H} NMR (150 MHz, CDCl<sub>3</sub>)

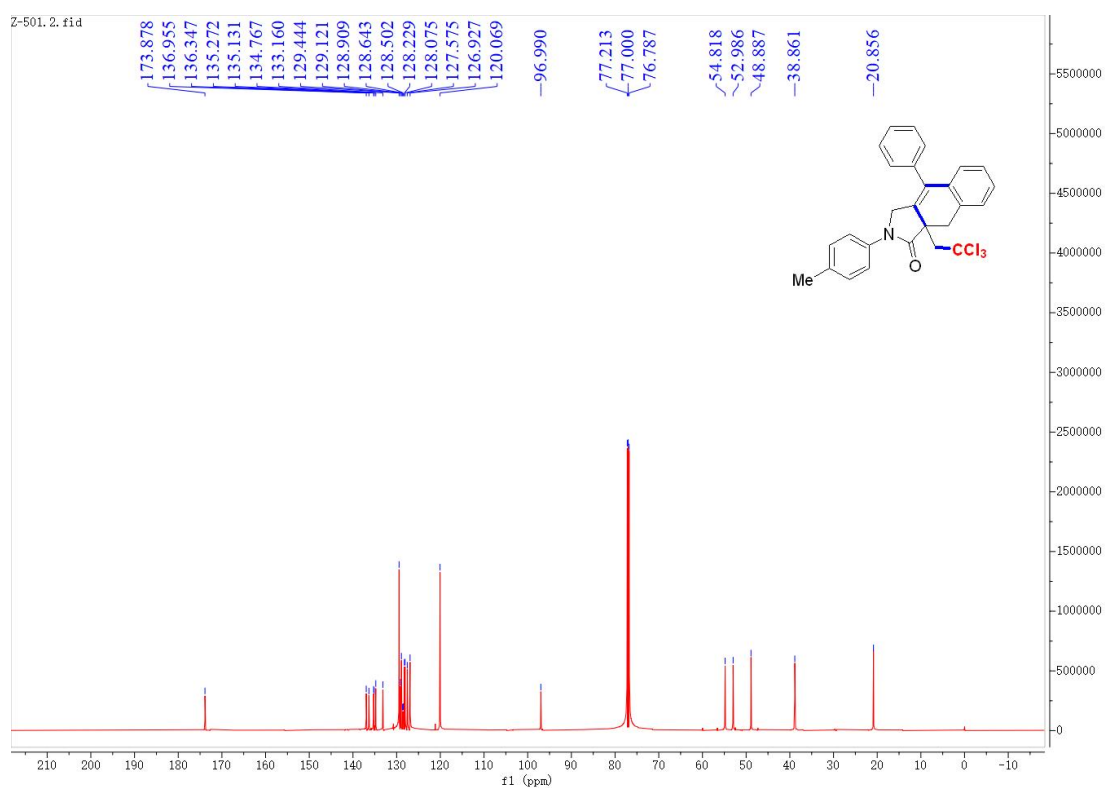

### 18-<sup>1</sup>H NMR (600 MHz, CDCl<sub>3</sub>)

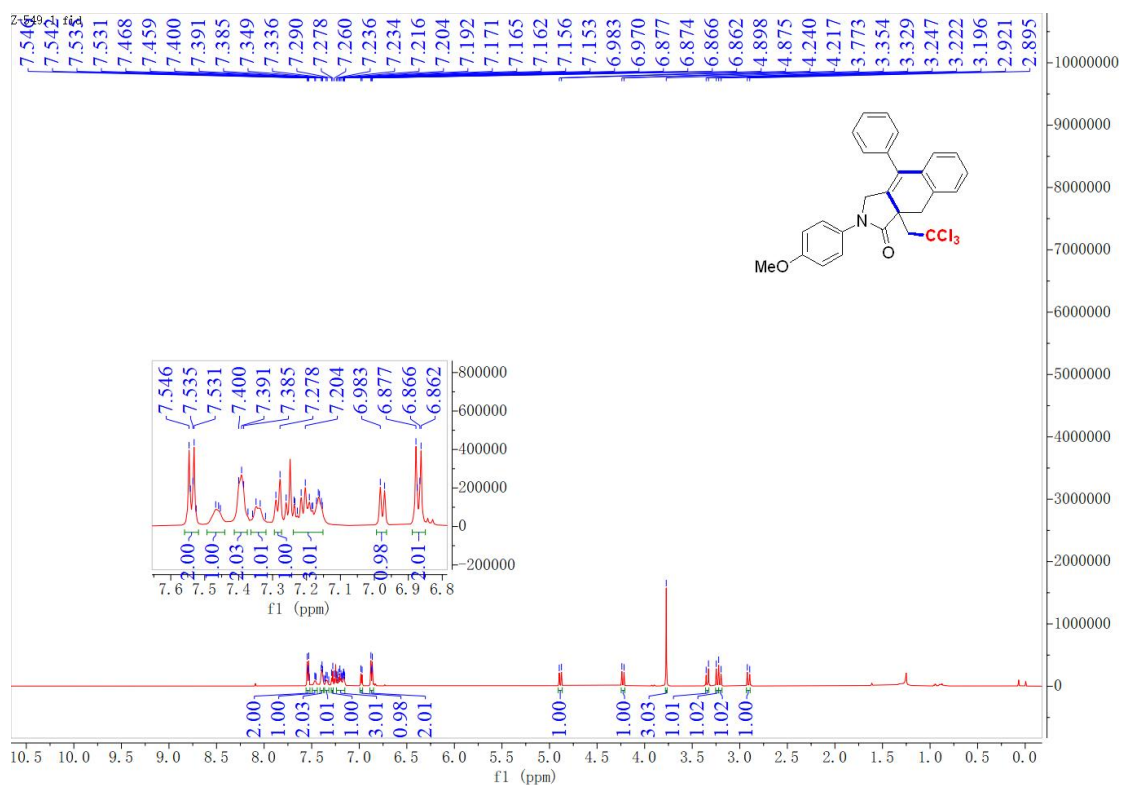

### 18-<sup>13</sup>C {<sup>1</sup>H} NMR (150 MHz, CDCl<sub>3</sub>)

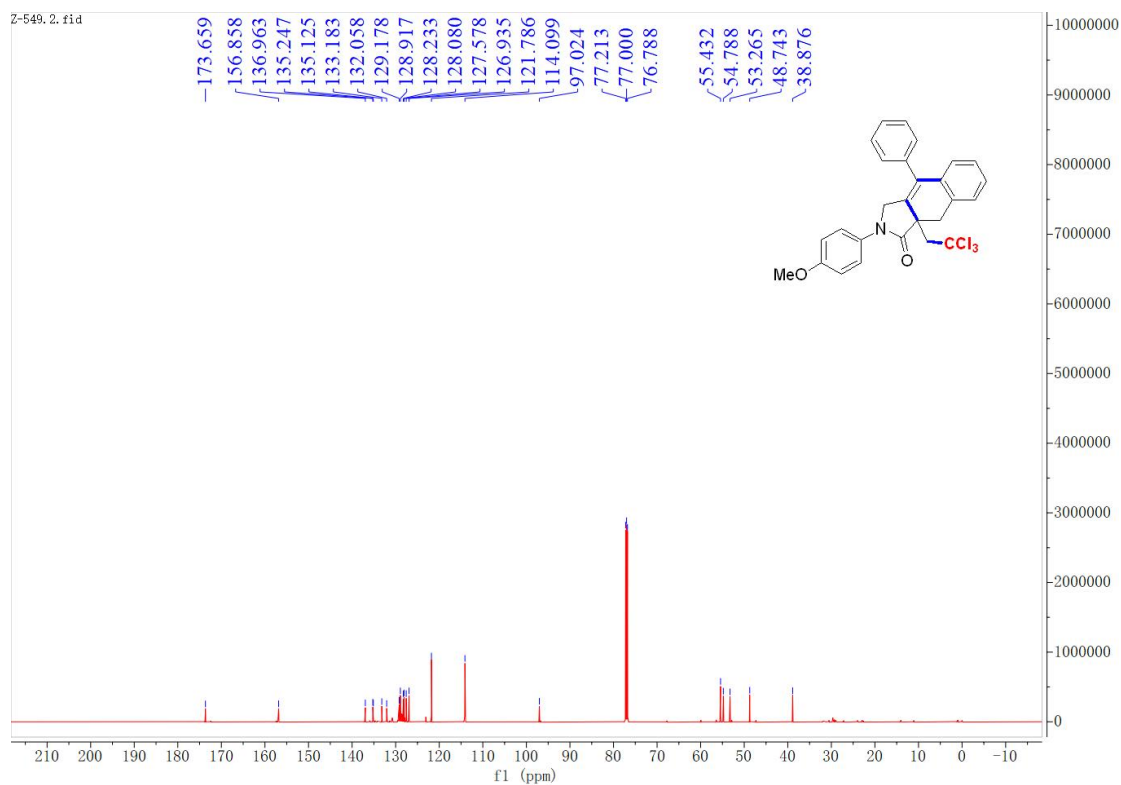

**19-<sup>1</sup>H NMR (400 MHz, CDCl<sub>3</sub>)**

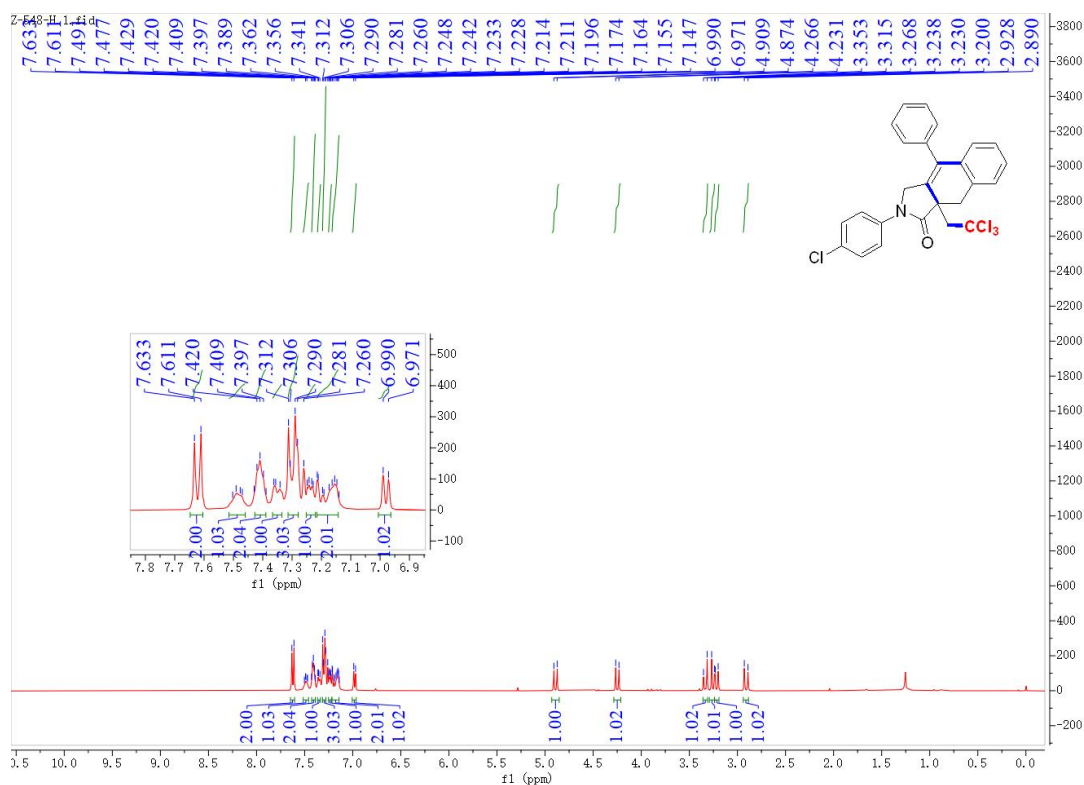

**19-<sup>13</sup>C {<sup>1</sup>H} NMR (100 MHz, CDCl<sub>3</sub>)**

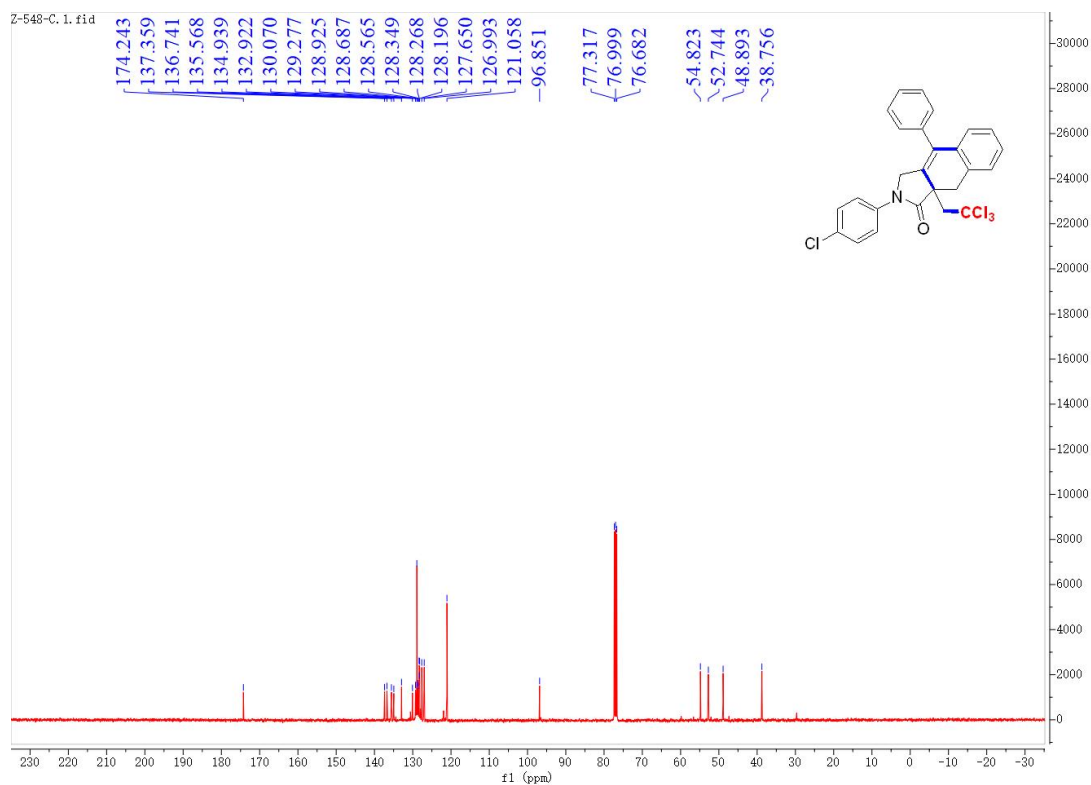



## 20-<sup>1</sup>H NMR (600 MHz, CDCl<sub>3</sub>)

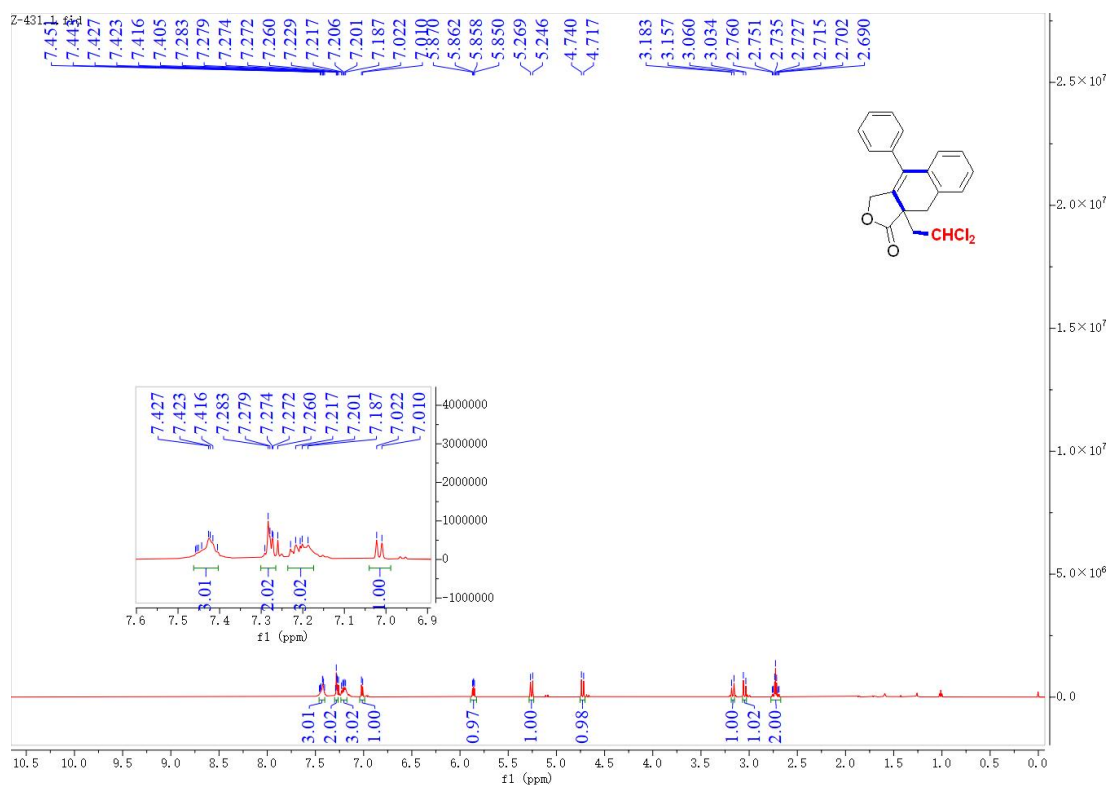

## 20-<sup>13</sup>C {<sup>1</sup>H} NMR (150 MHz, CDCl<sub>3</sub>)

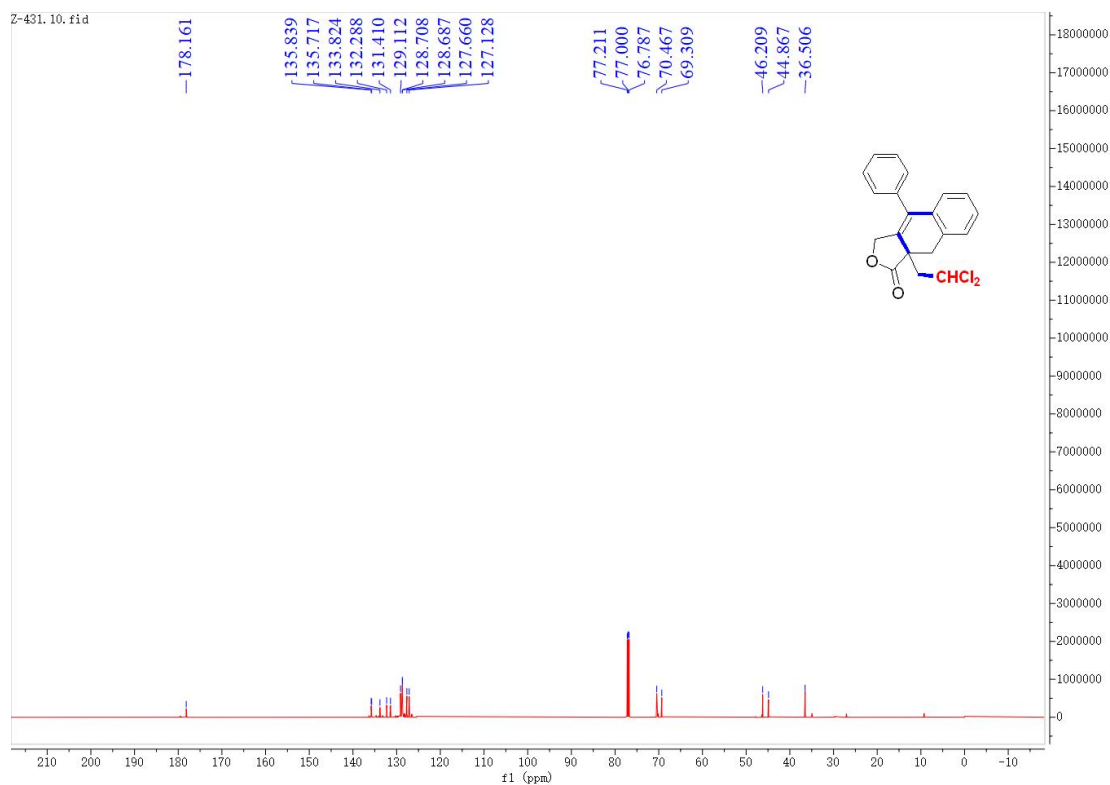

### 21-<sup>1</sup>H NMR (400 MHz, CDCl<sub>3</sub>)

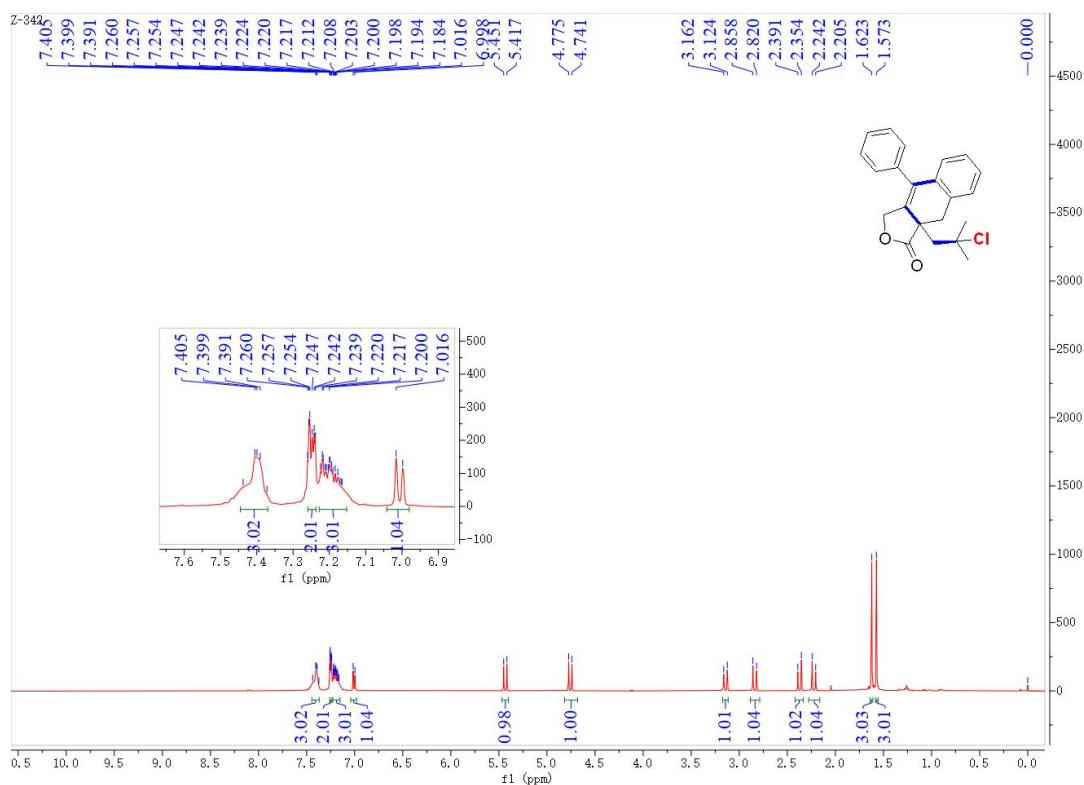

### 21-<sup>13</sup>C {<sup>1</sup>H} NMR (100 MHz, CDCl<sub>3</sub>)

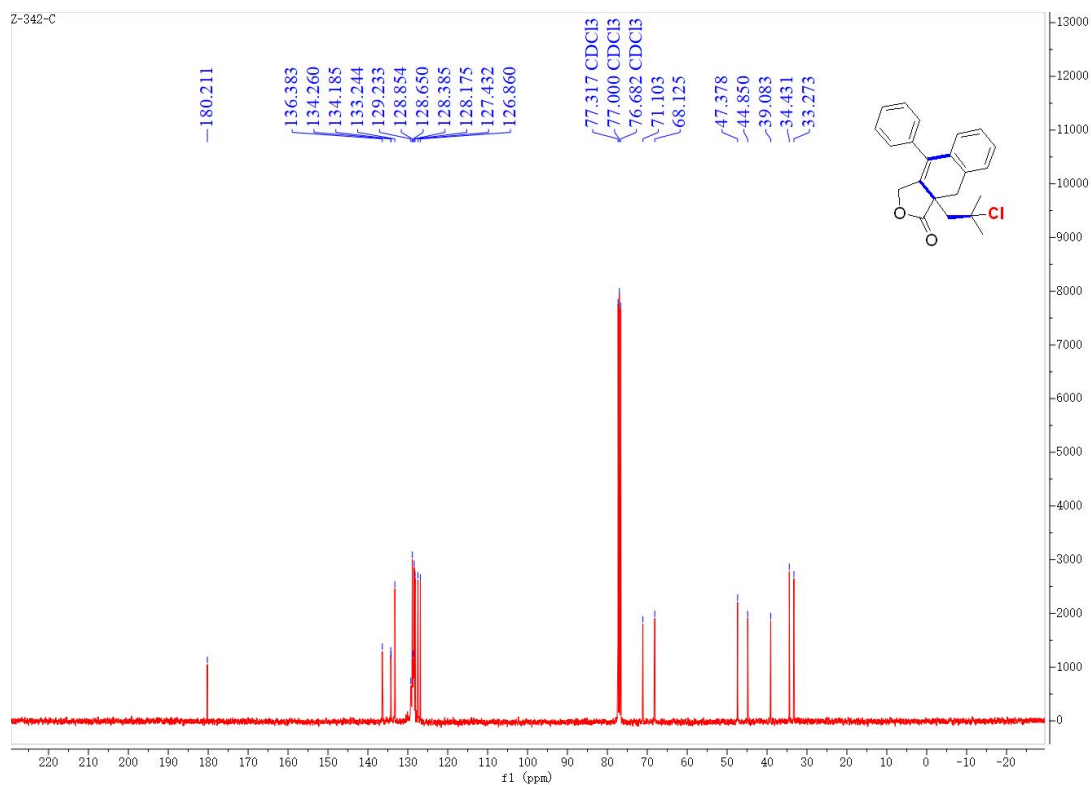

## 22-<sup>1</sup>H NMR (400 MHz, CDCl<sub>3</sub>)

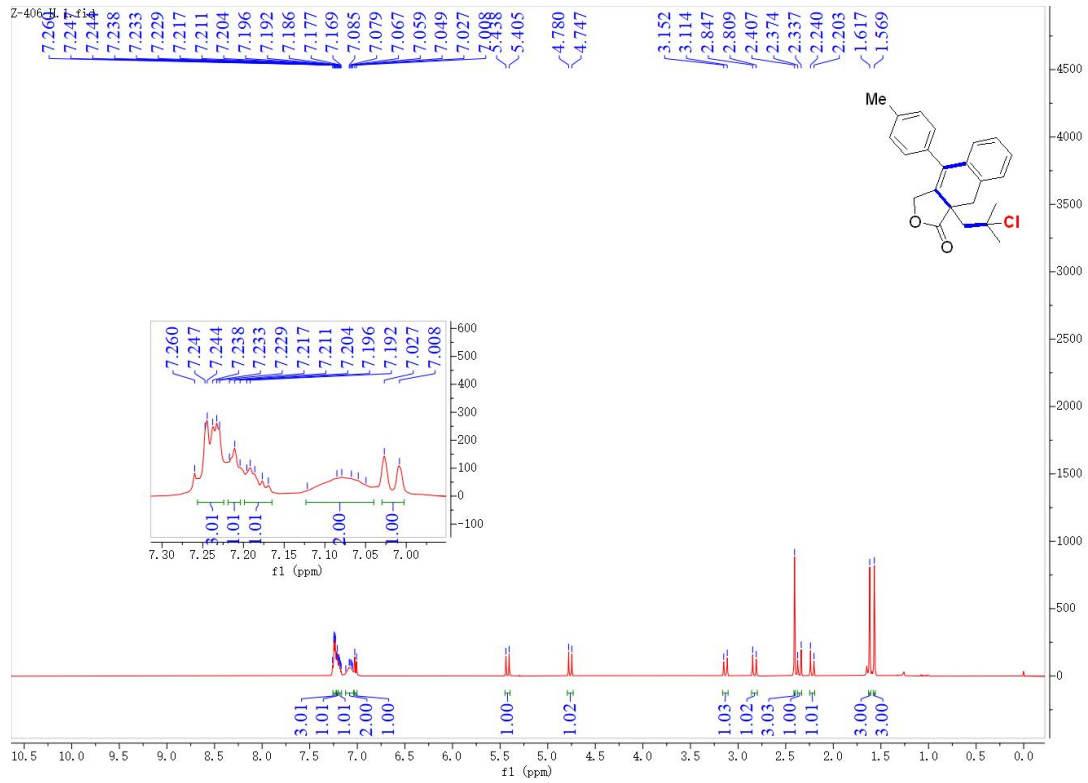

## 22-<sup>13</sup>C {<sup>1</sup>H} NMR (100 MHz, CDCl<sub>3</sub>)

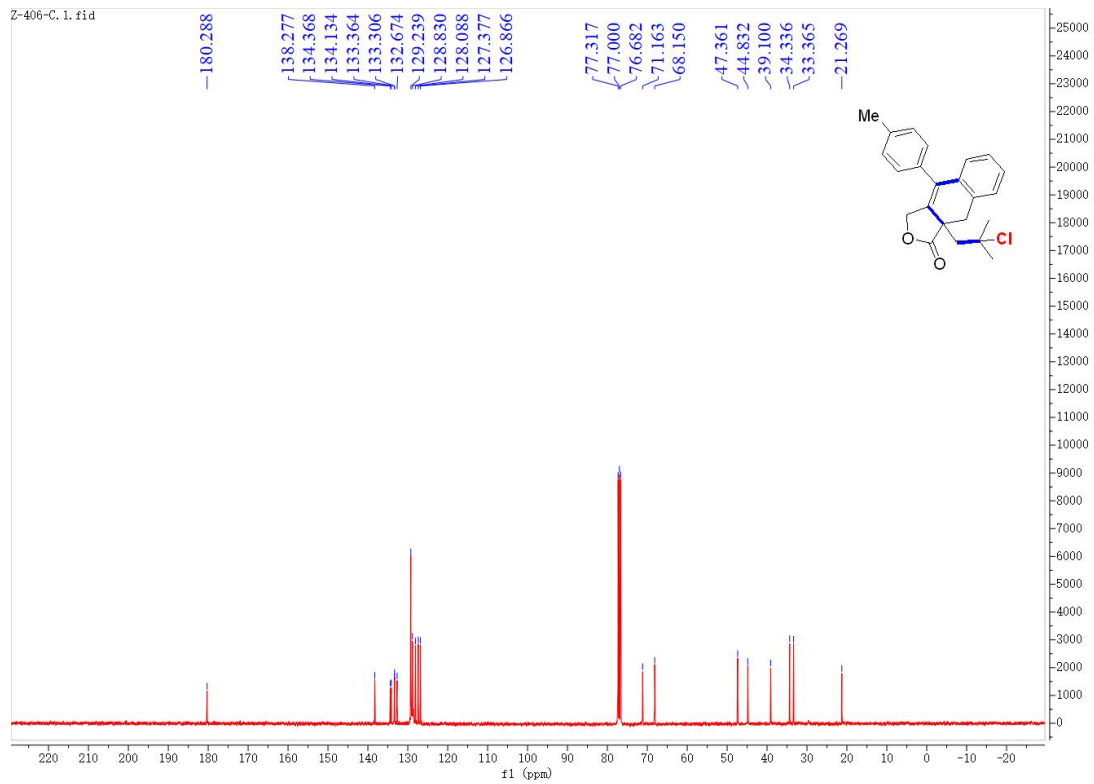

### 23-<sup>1</sup>H NMR (400 MHz, CDCl<sub>3</sub>)

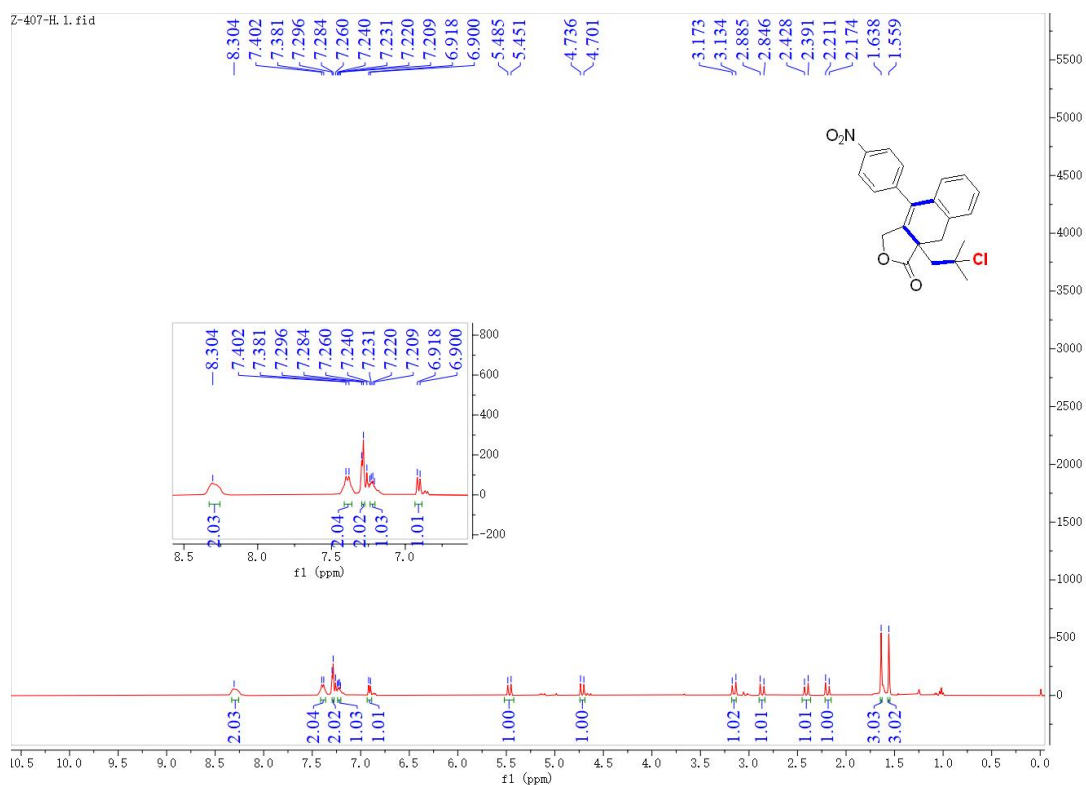

### 23-<sup>13</sup>C{<sup>1</sup>H} NMR (100 MHz, CDCl<sub>3</sub>)

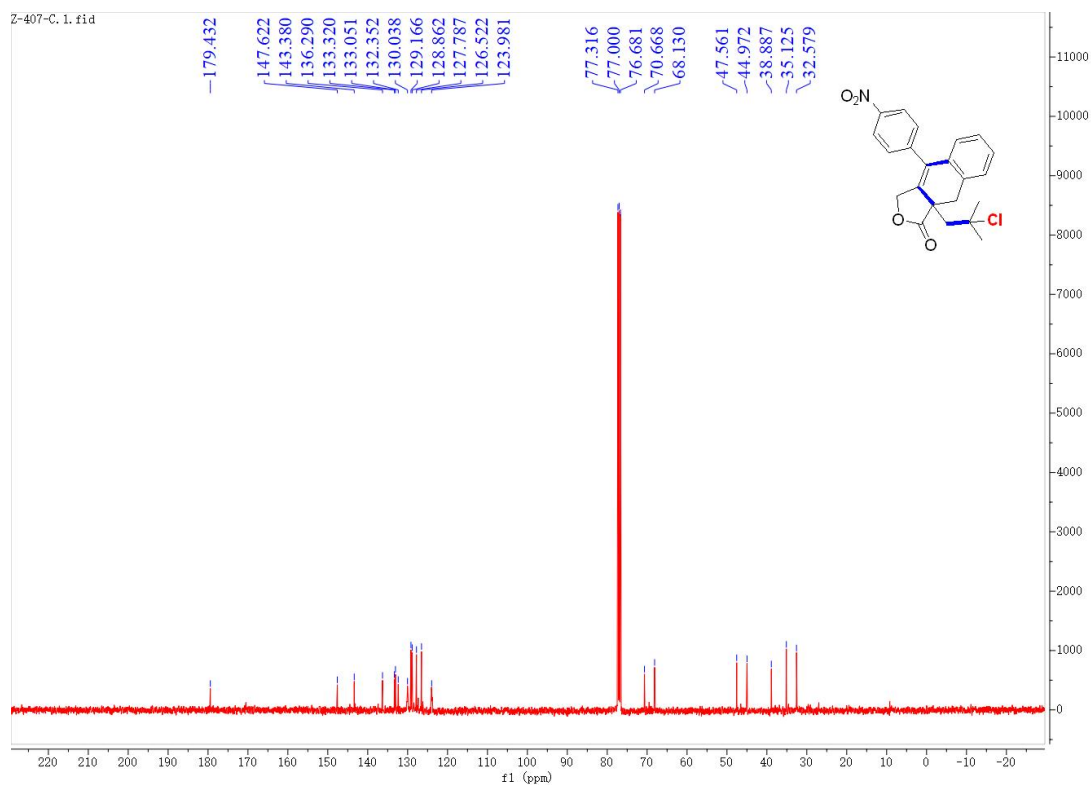

**24-<sup>1</sup>H NMR (400 MHz, CDCl<sub>3</sub>)**

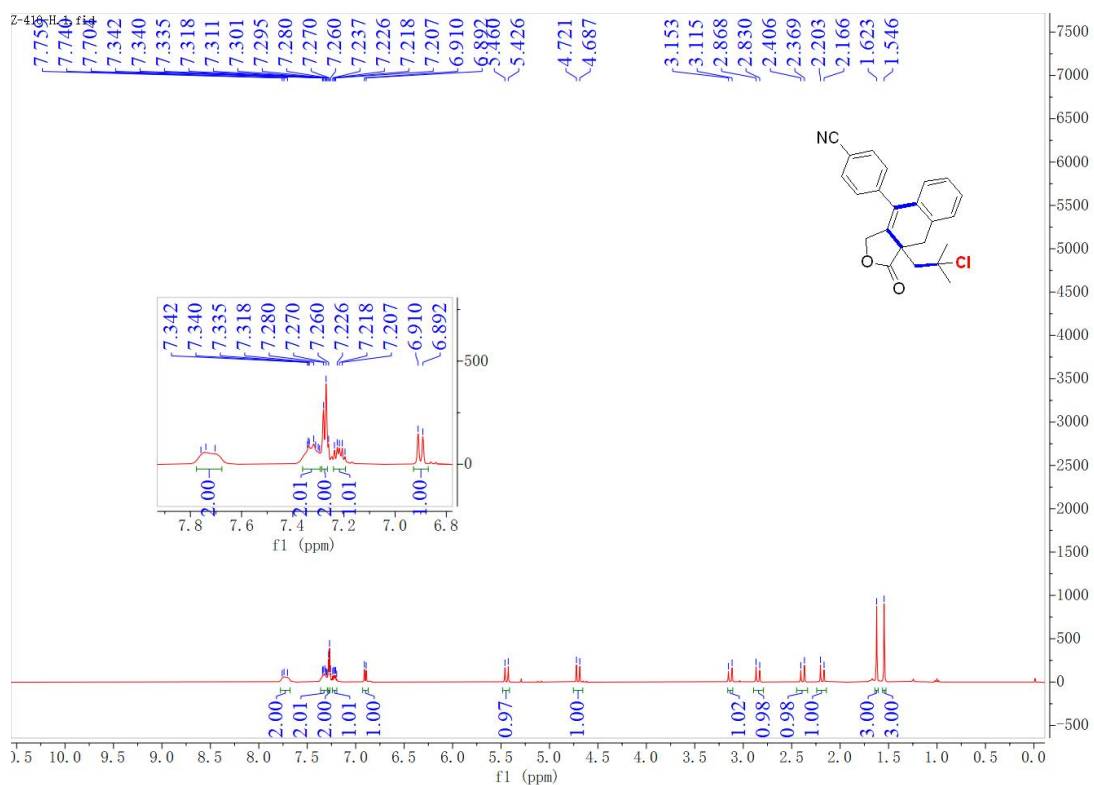

**24-<sup>13</sup>C {<sup>1</sup>H} NMR (100 MHz, CDCl<sub>3</sub>)**

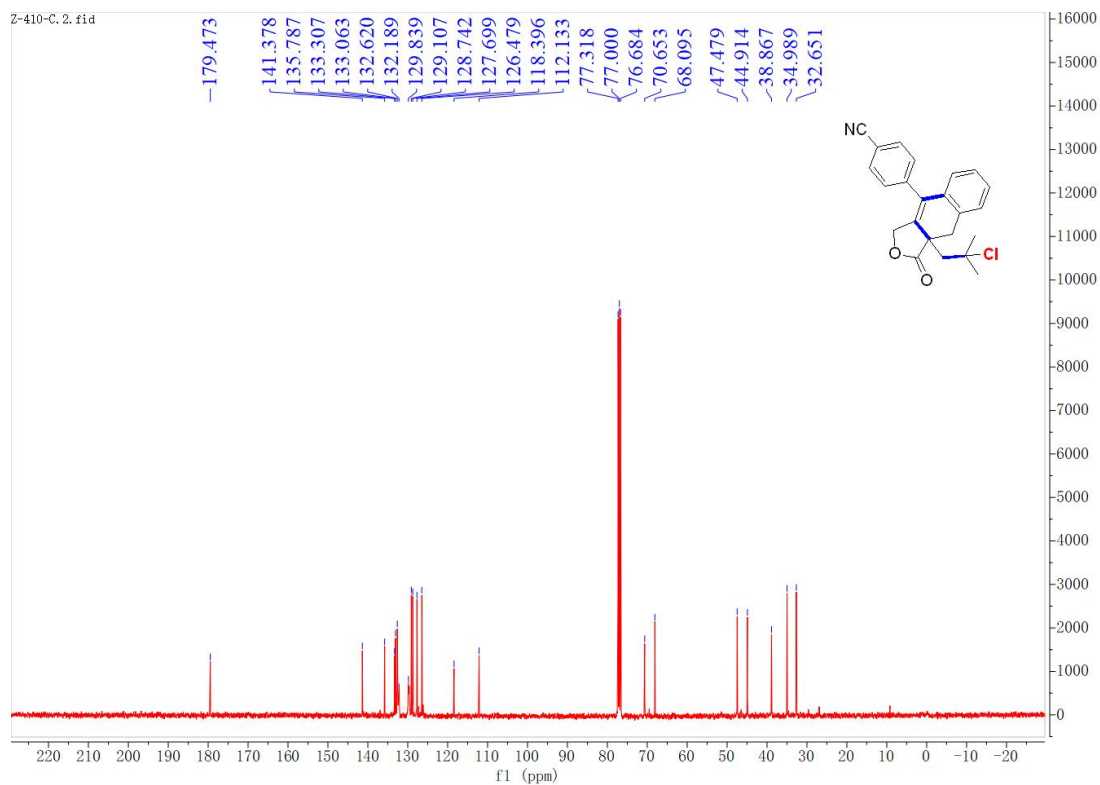

**25-<sup>1</sup>H NMR (400 MHz, CDCl<sub>3</sub>)**

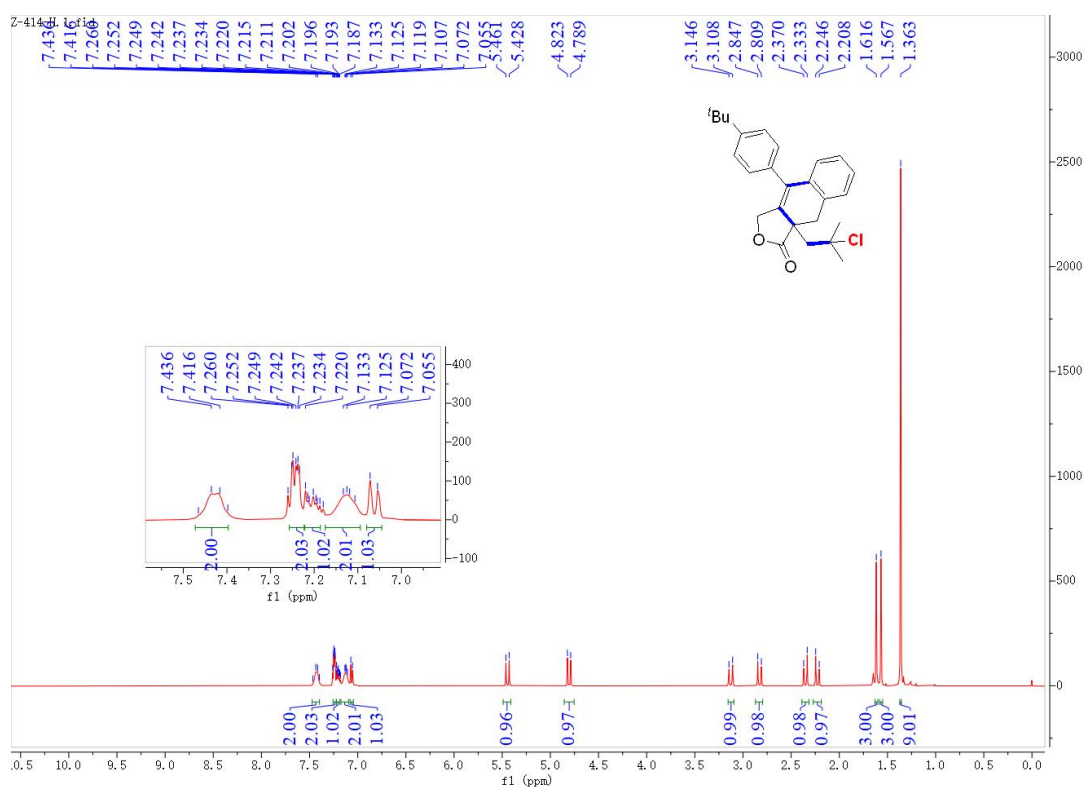

**25-<sup>13</sup>C {<sup>1</sup>H} NMR (100 MHz, CDCl<sub>3</sub>)**

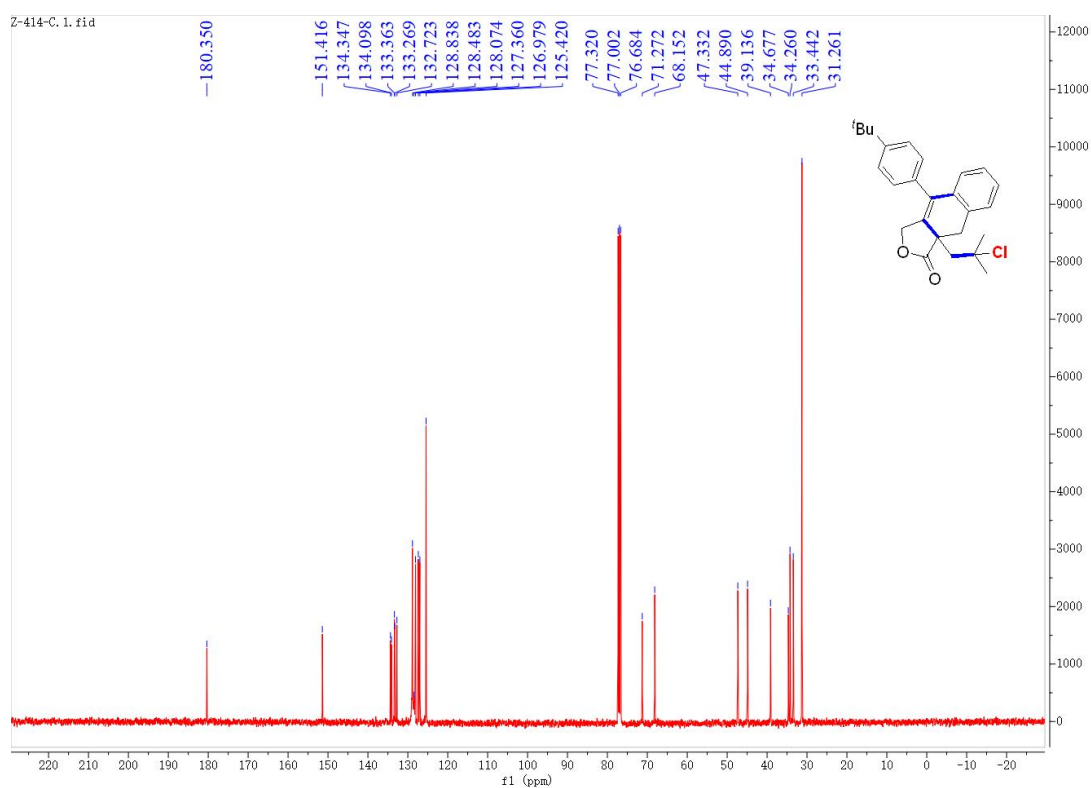

### 26-<sup>1</sup>H NMR (400 MHz, CDCl<sub>3</sub>)

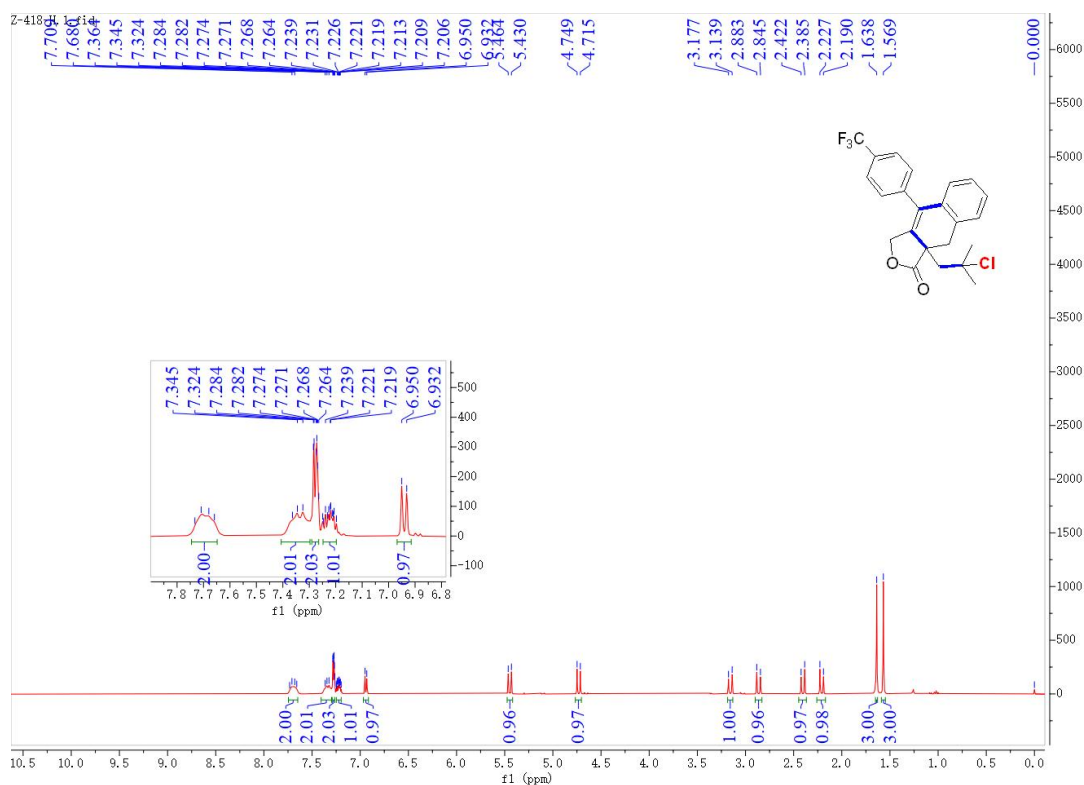

### 26-<sup>13</sup>C {<sup>1</sup>H} NMR (100 MHz, CDCl<sub>3</sub>)

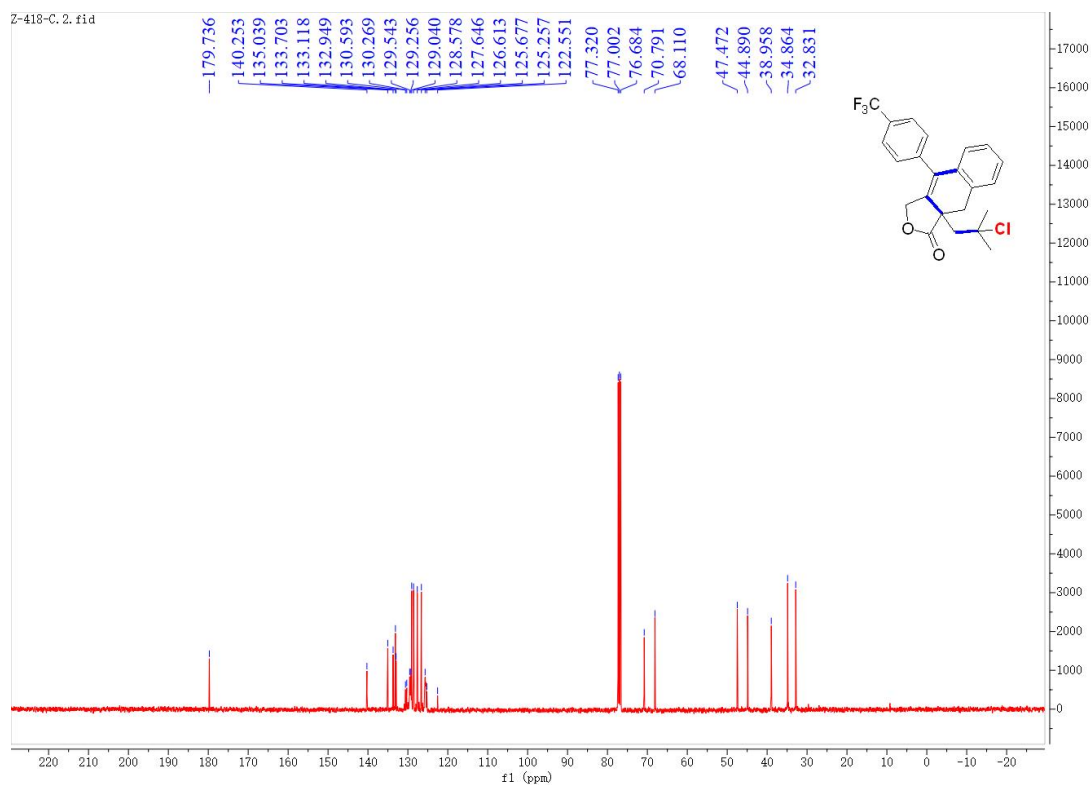

## 26-<sup>19</sup>F NMR (565 MHz, CDCl<sub>3</sub>)

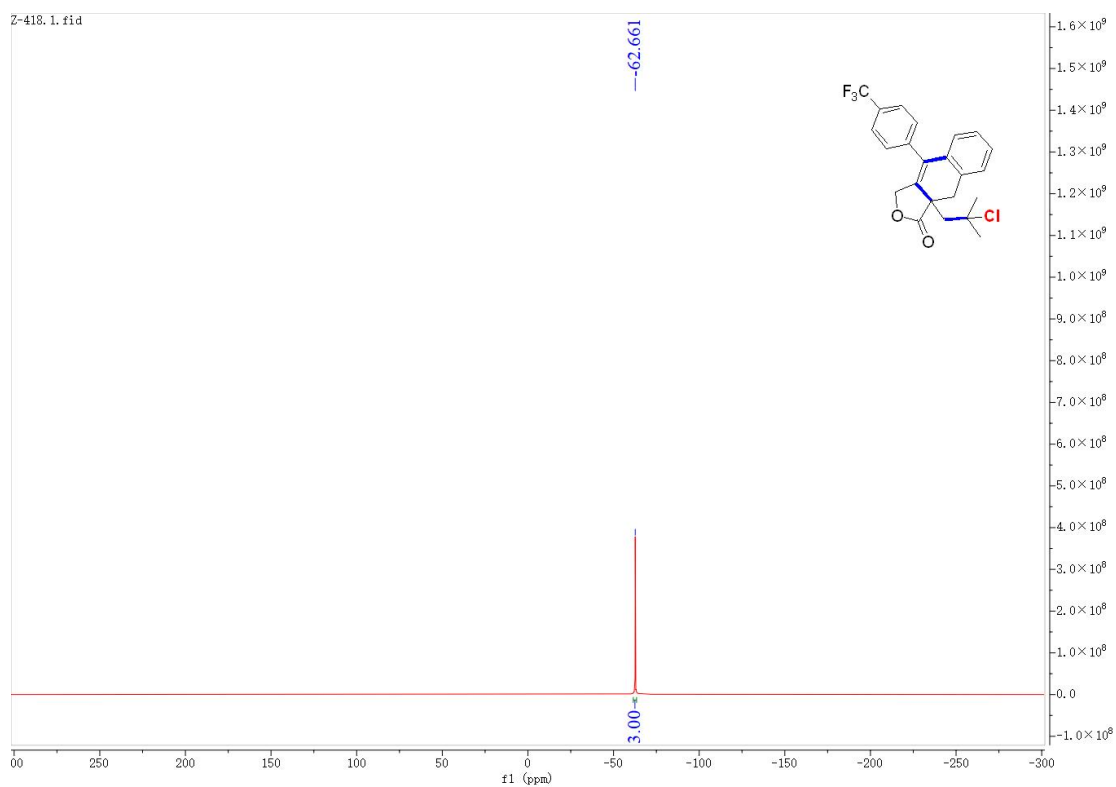

## 27-<sup>1</sup>H NMR (600 MHz, CDCl<sub>3</sub>)

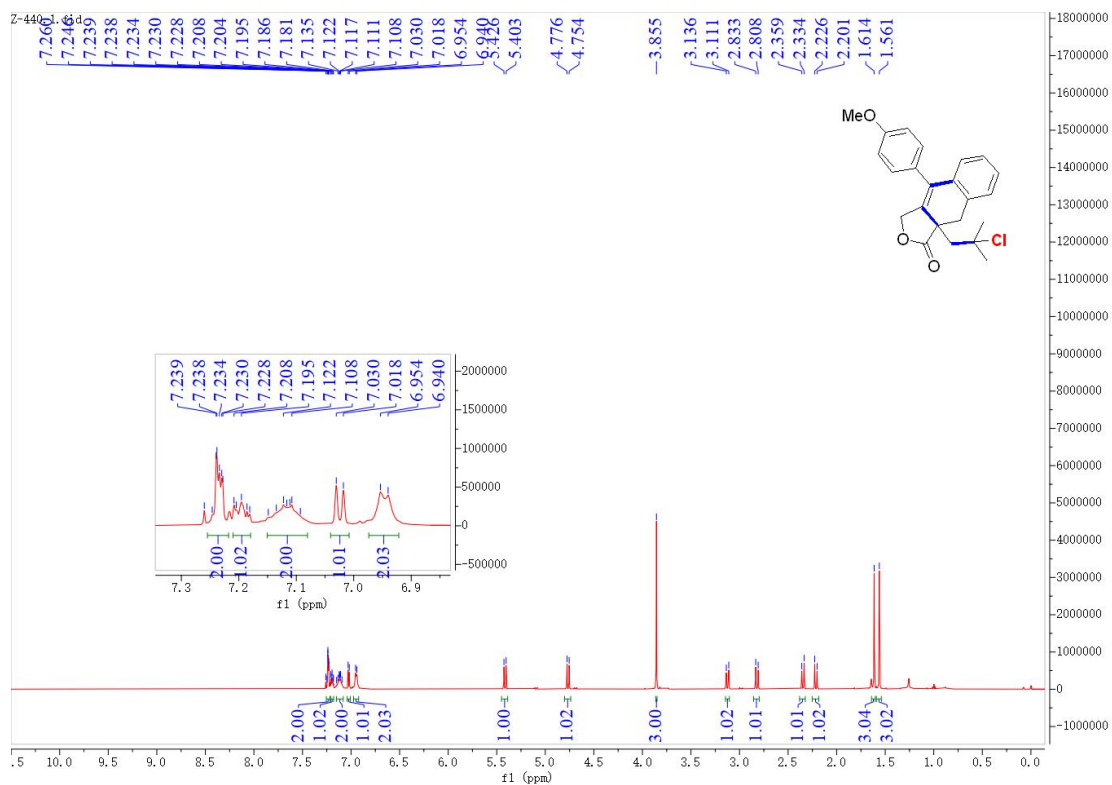



27-<sup>13</sup>C{<sup>1</sup>H} NMR (150 MHz, CDCl<sub>3</sub>)

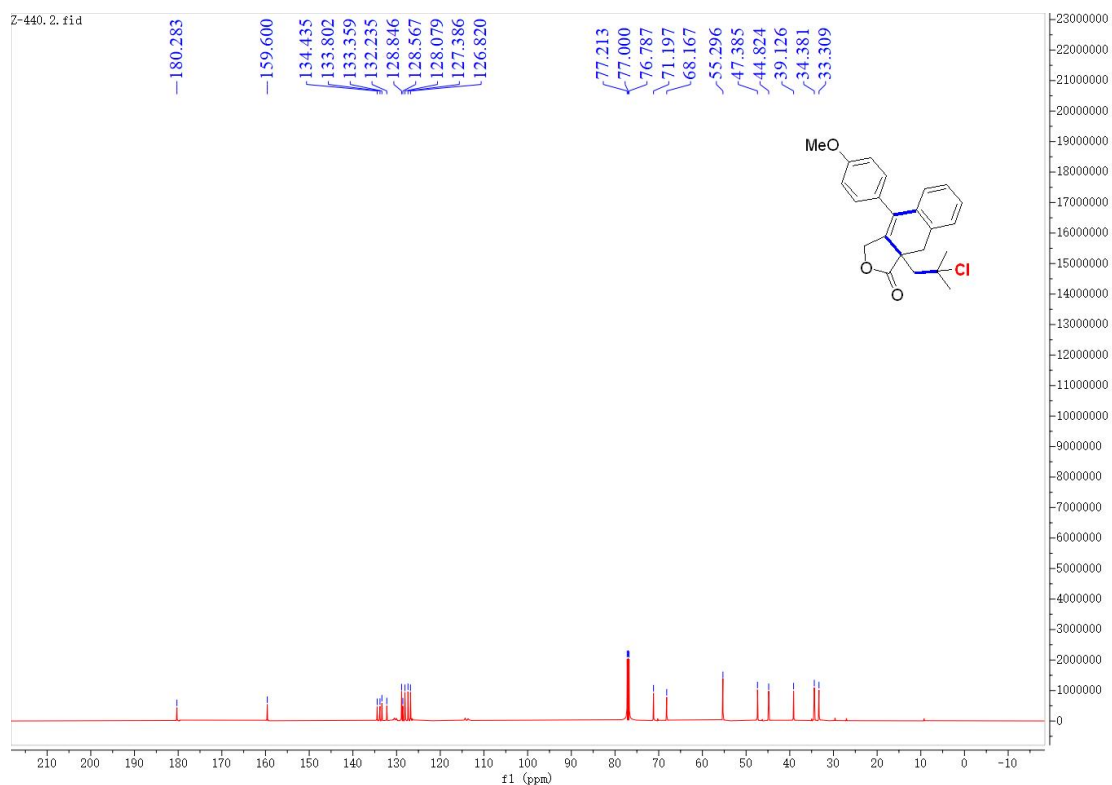

28-<sup>1</sup>H NMR (400 MHz, CDCl<sub>3</sub>)

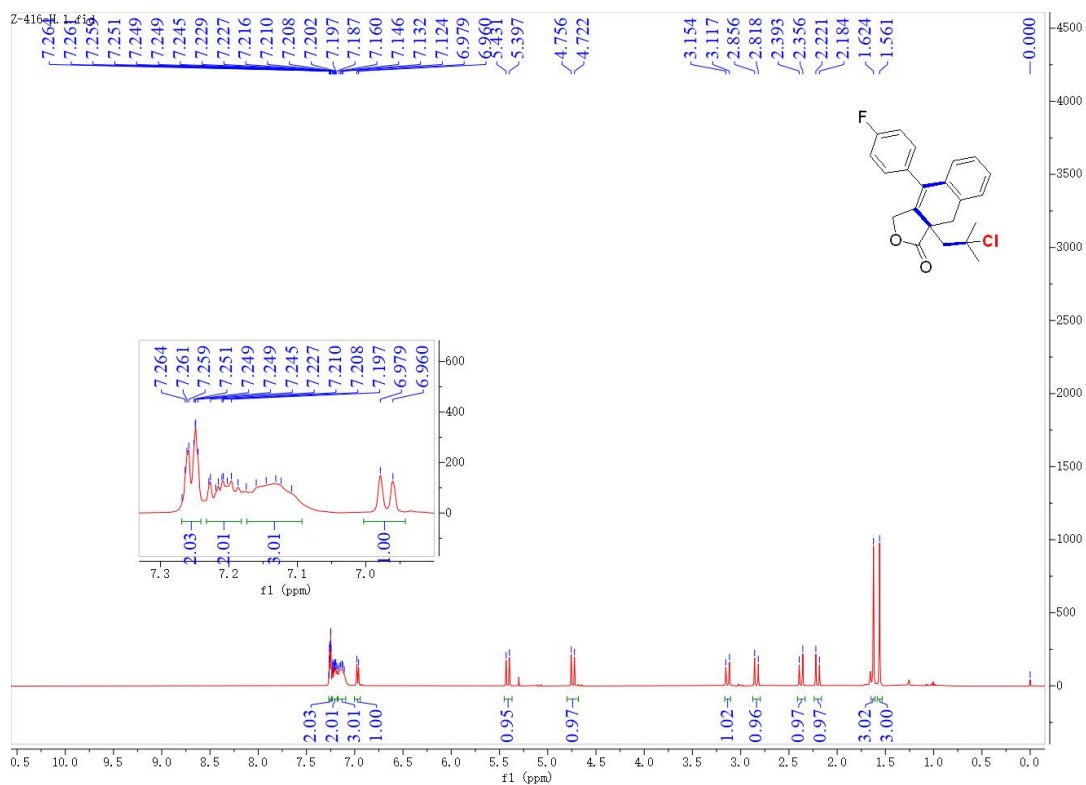

### 28-<sup>13</sup>C{<sup>1</sup>H} NMR (100 MHz, CDCl<sub>3</sub>)

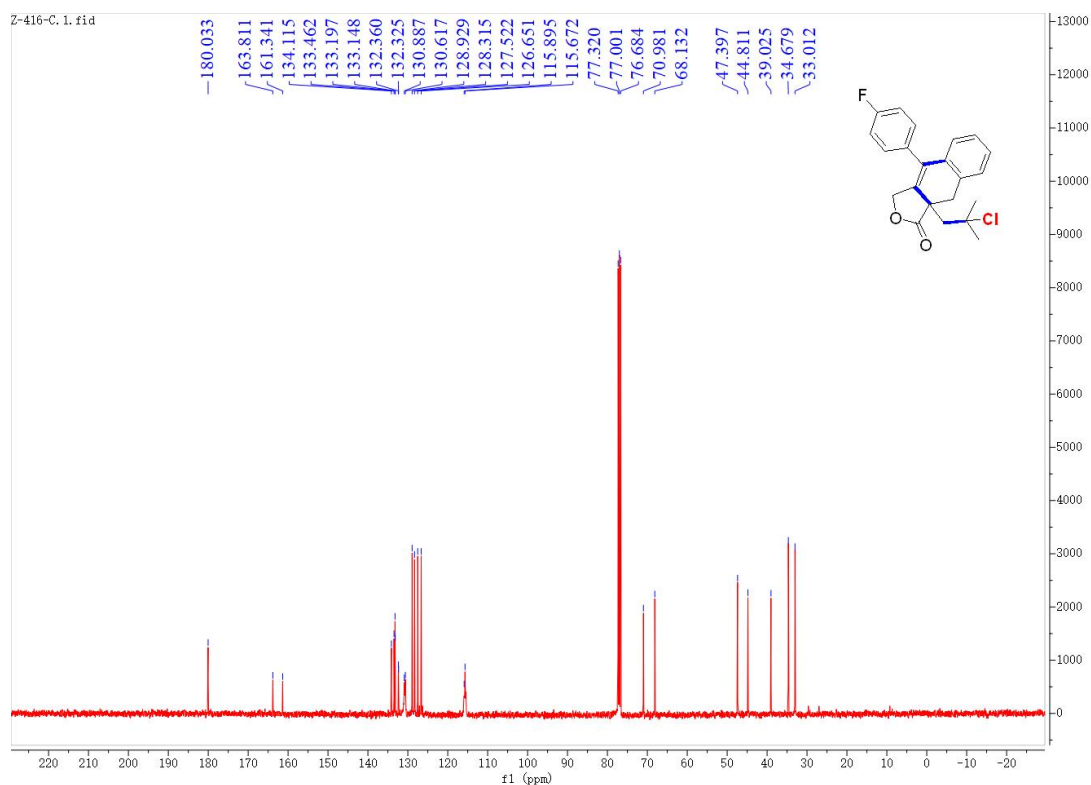

### 28-<sup>19</sup>F NMR (565 MHz, CDCl<sub>3</sub>)

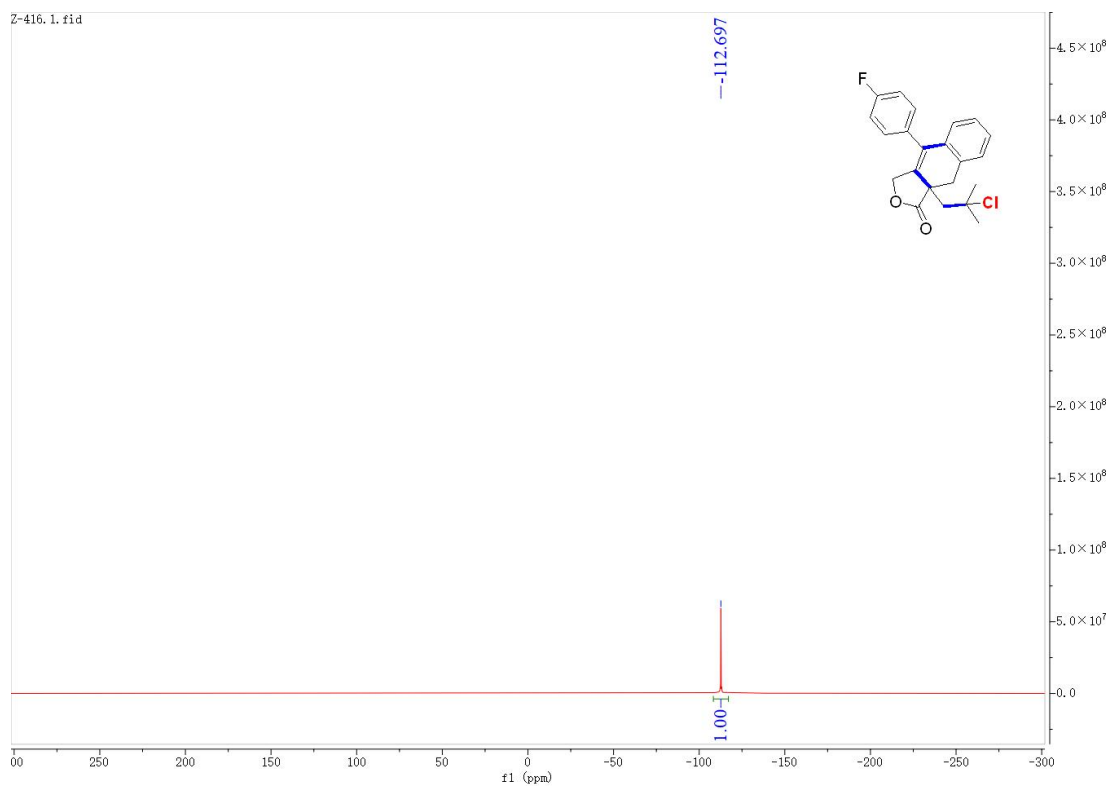

**29-<sup>1</sup>H NMR (400 MHz, CDCl<sub>3</sub>)**

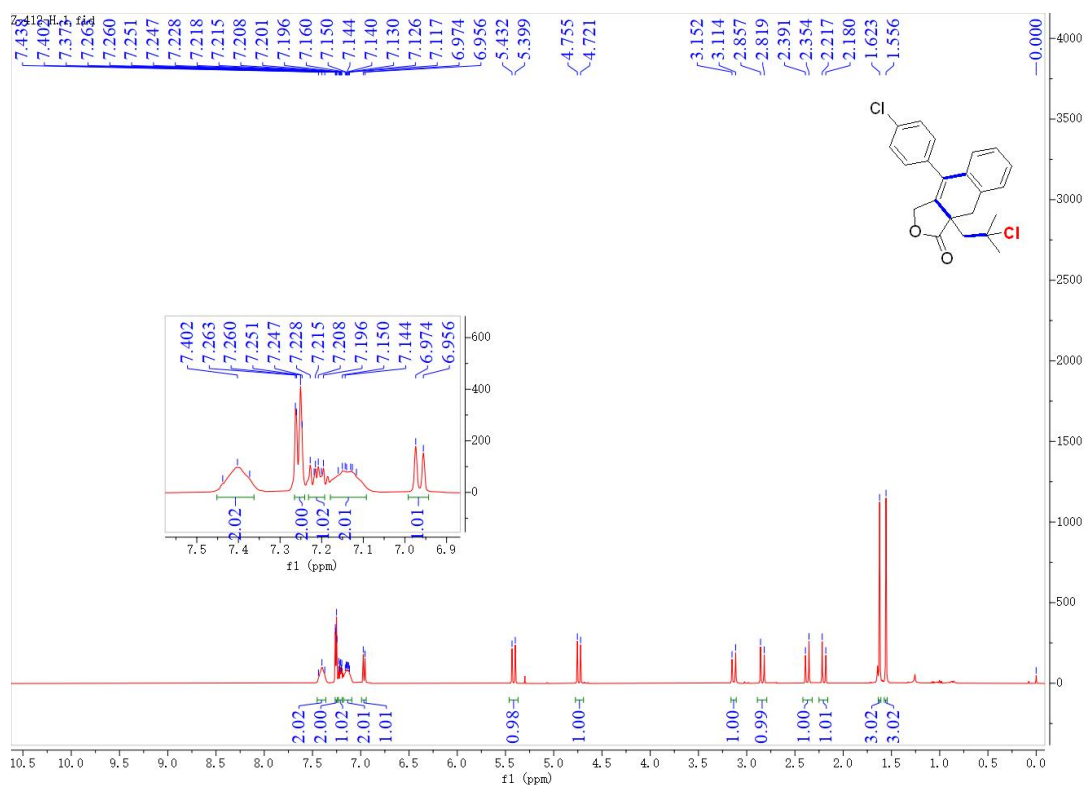

**29-<sup>13</sup>C {<sup>1</sup>H} NMR (100 MHz, CDCl<sub>3</sub>)**

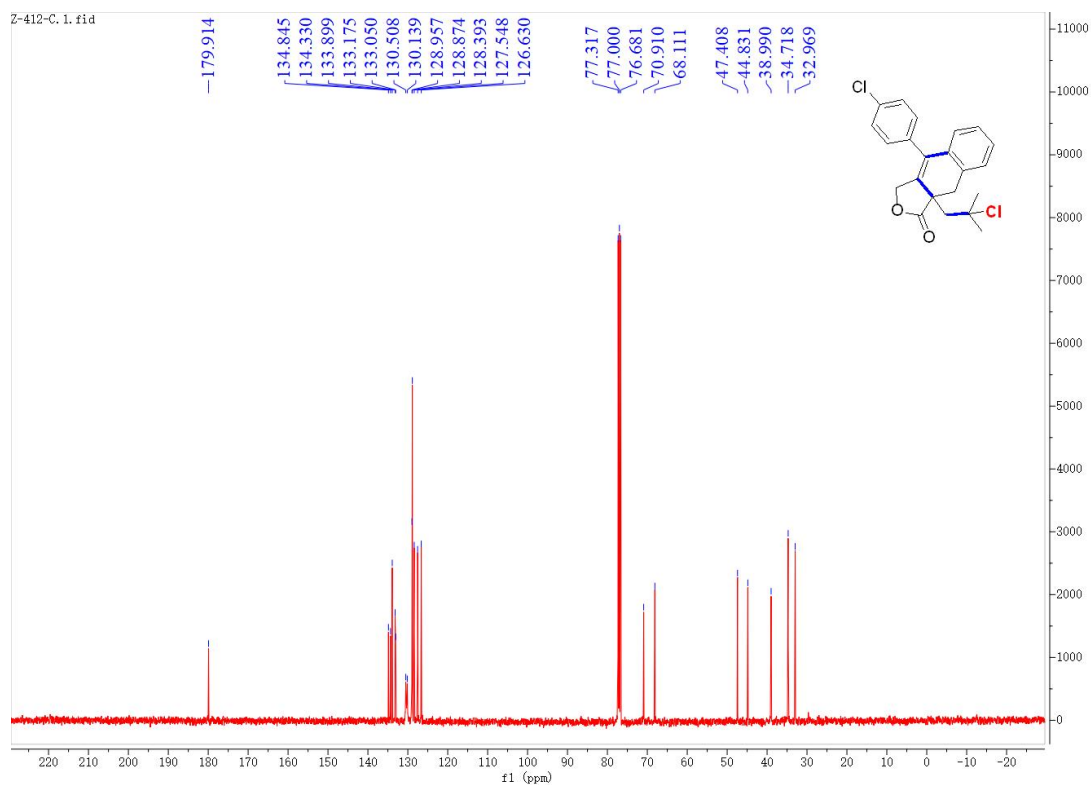

**30-<sup>1</sup>H NMR (600 MHz, CDCl<sub>3</sub>)**

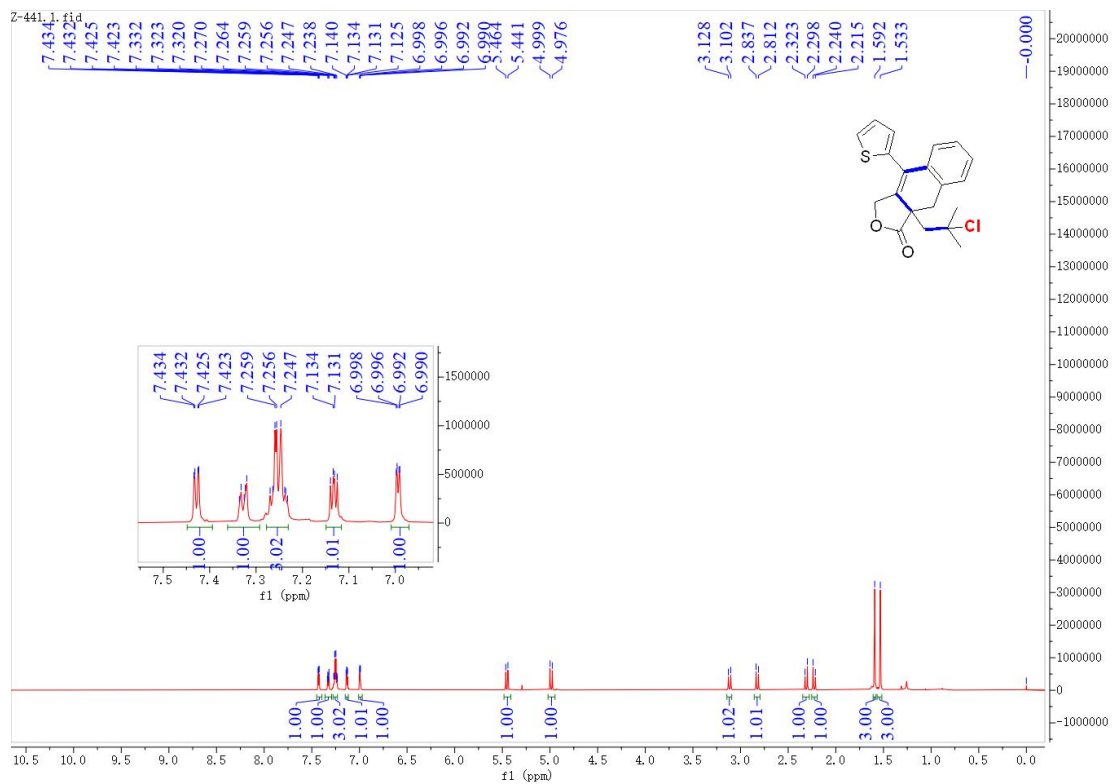

**30-<sup>13</sup>C {<sup>1</sup>H} NMR (150 MHz, CDCl<sub>3</sub>)**

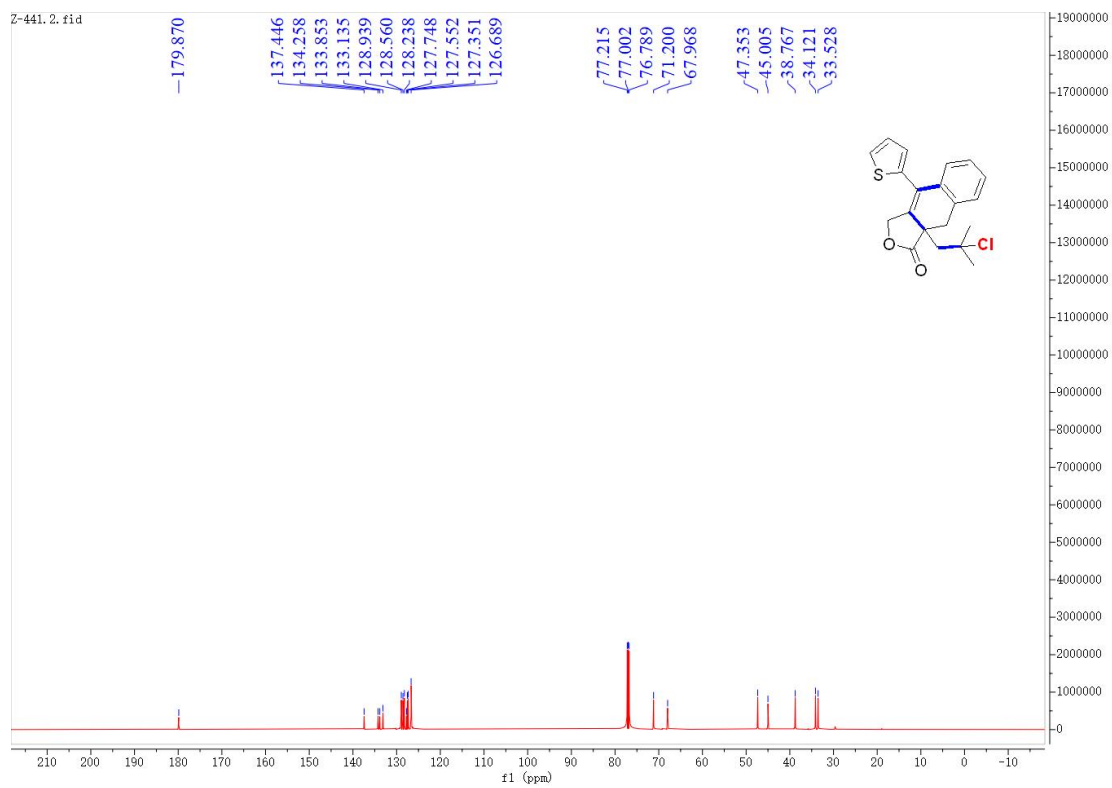

**31-<sup>1</sup>H NMR (600 MHz, CDCl<sub>3</sub>)**

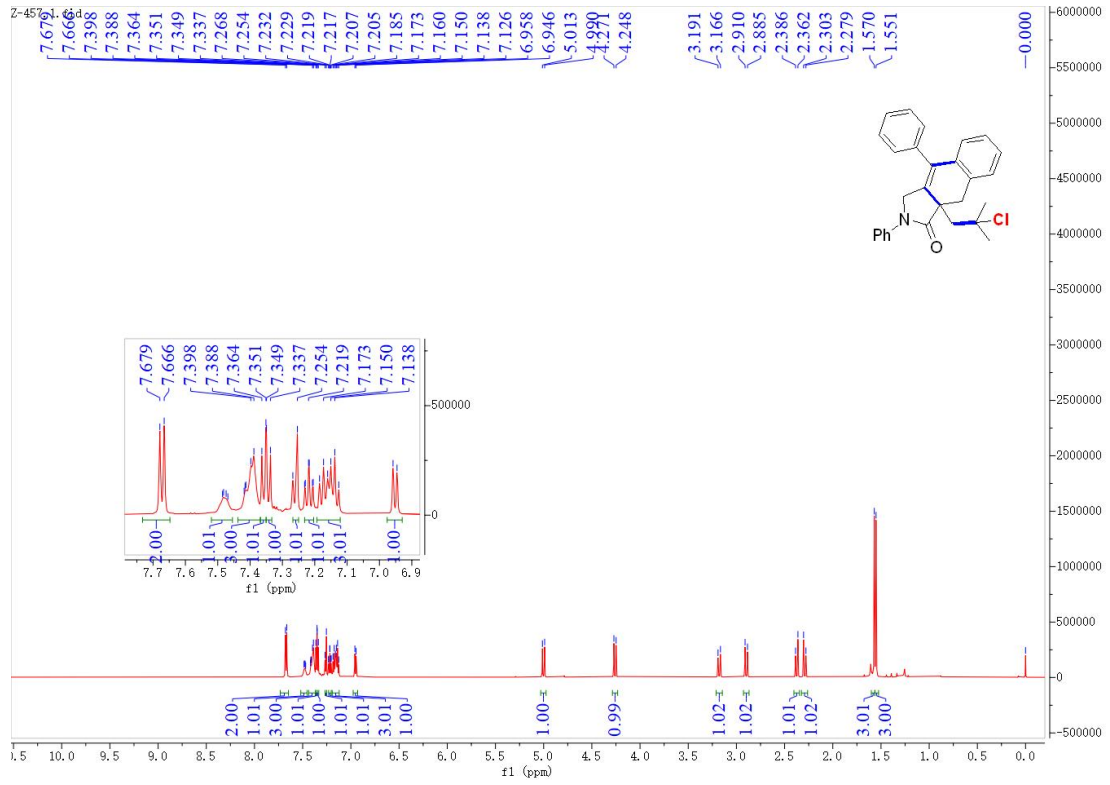

**31-<sup>13</sup>C {<sup>1</sup>H} NMR (150 MHz, CDCl<sub>3</sub>)**

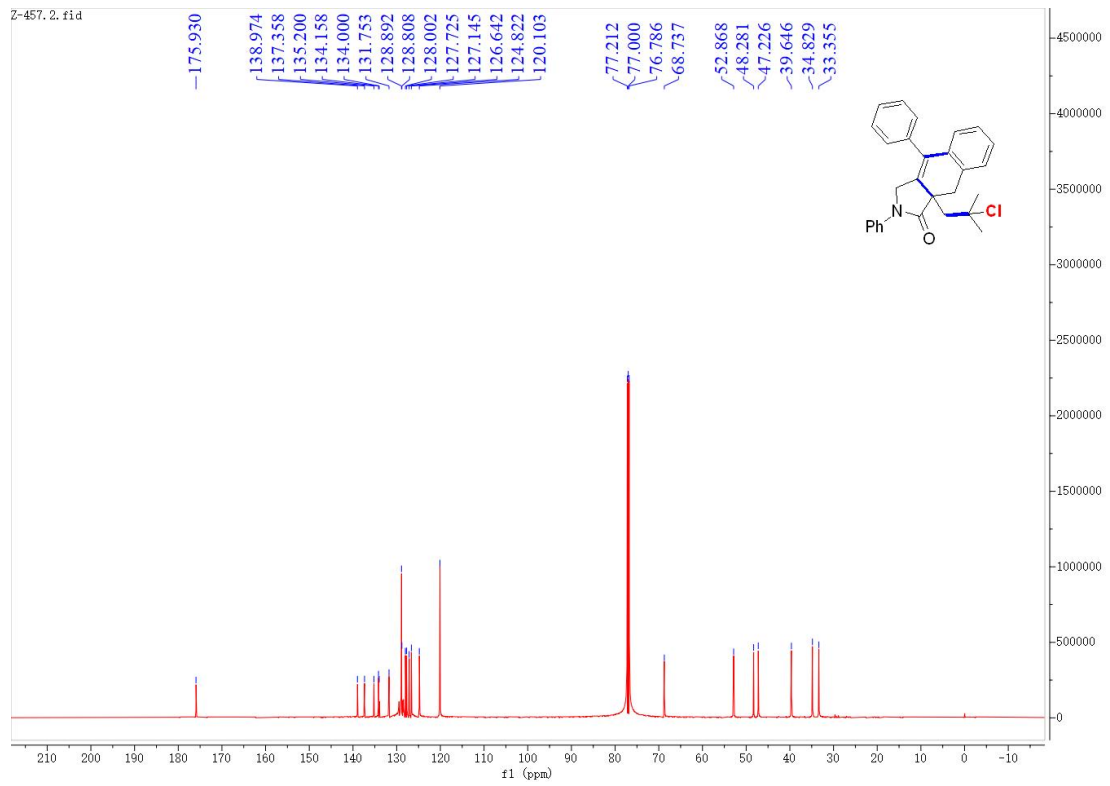

**32-<sup>1</sup>H NMR (600 MHz, CDCl<sub>3</sub>)**

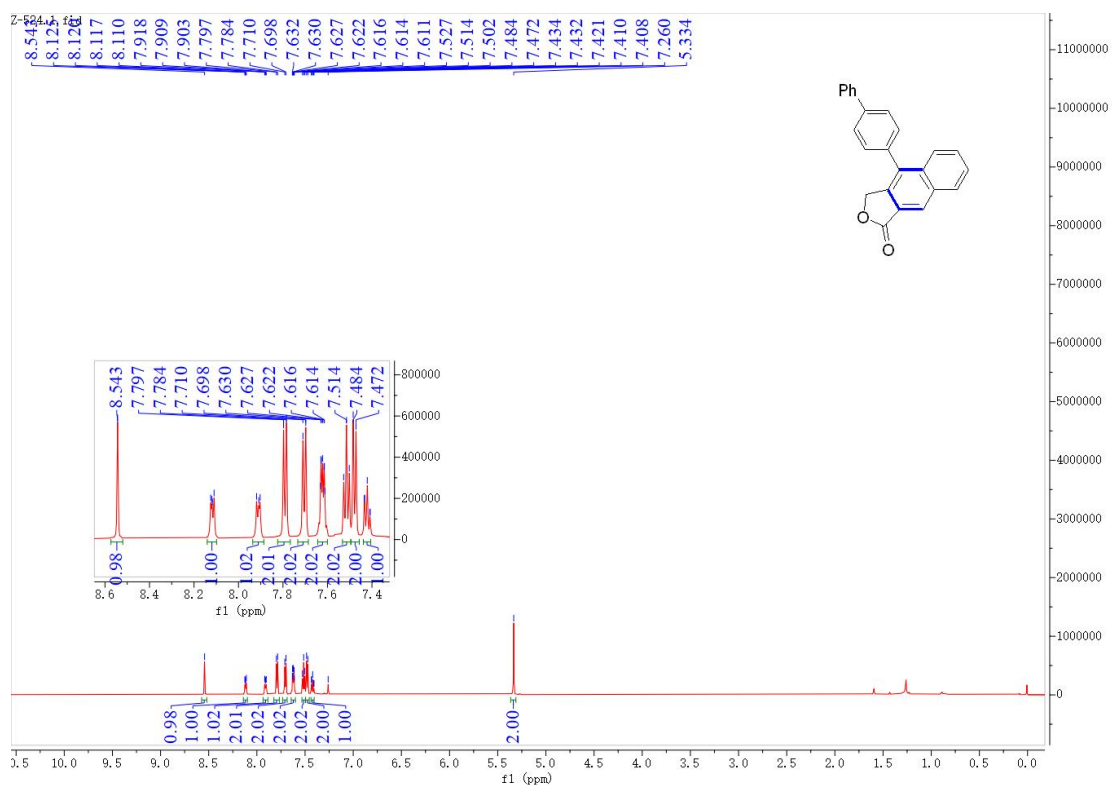

**32-<sup>13</sup>C {<sup>1</sup>H} NMR (150 MHz, CDCl<sub>3</sub>)**

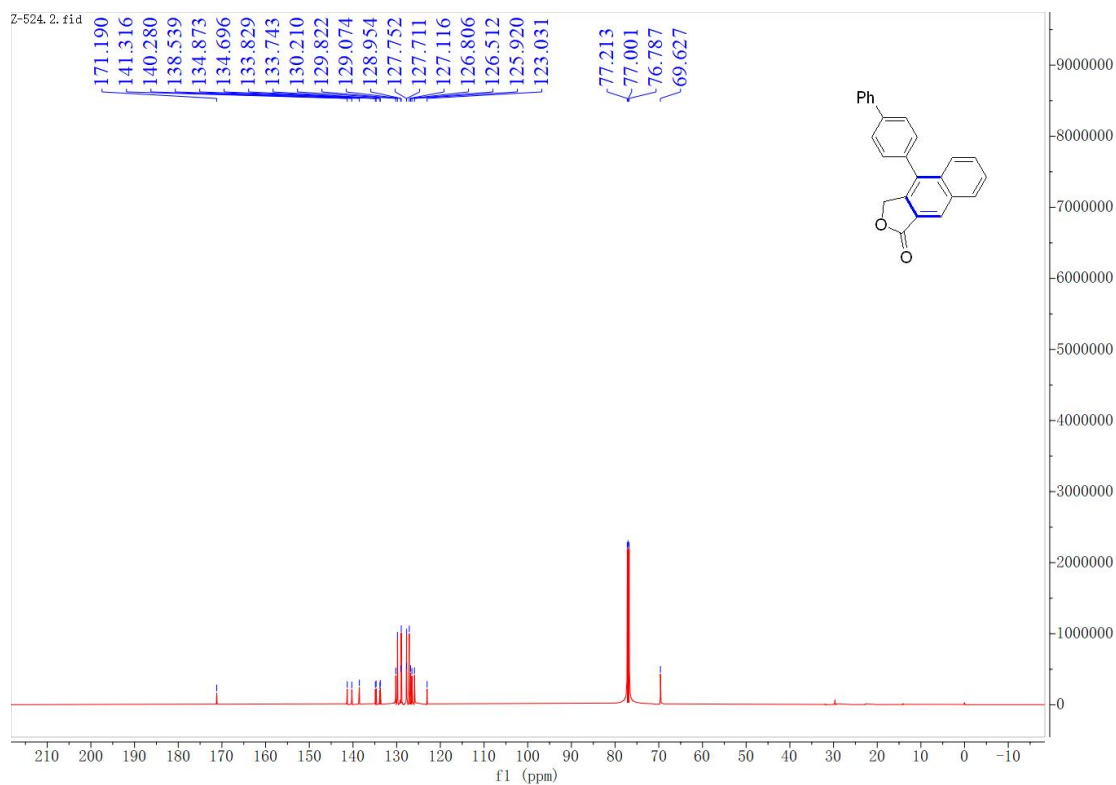

**33-<sup>1</sup>H NMR (600 MHz, CDCl<sub>3</sub>)**

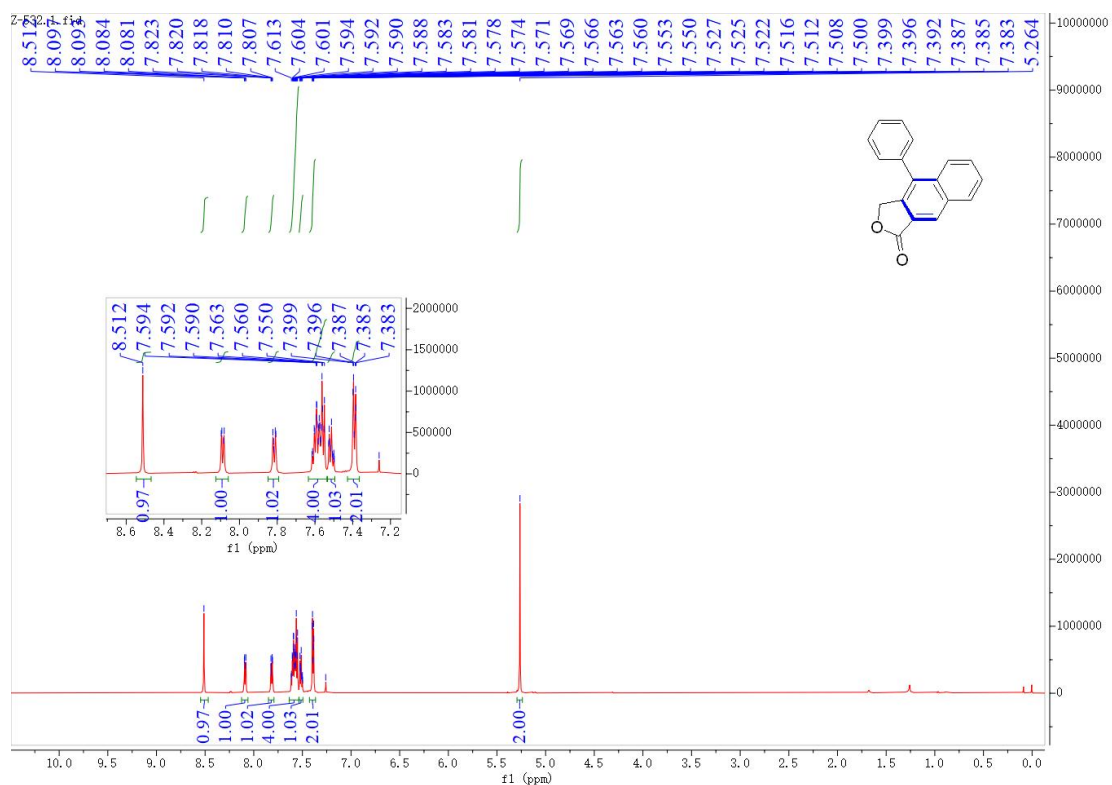

**33-<sup>13</sup>C {<sup>1</sup>H} NMR (150 MHz, CDCl<sub>3</sub>)**

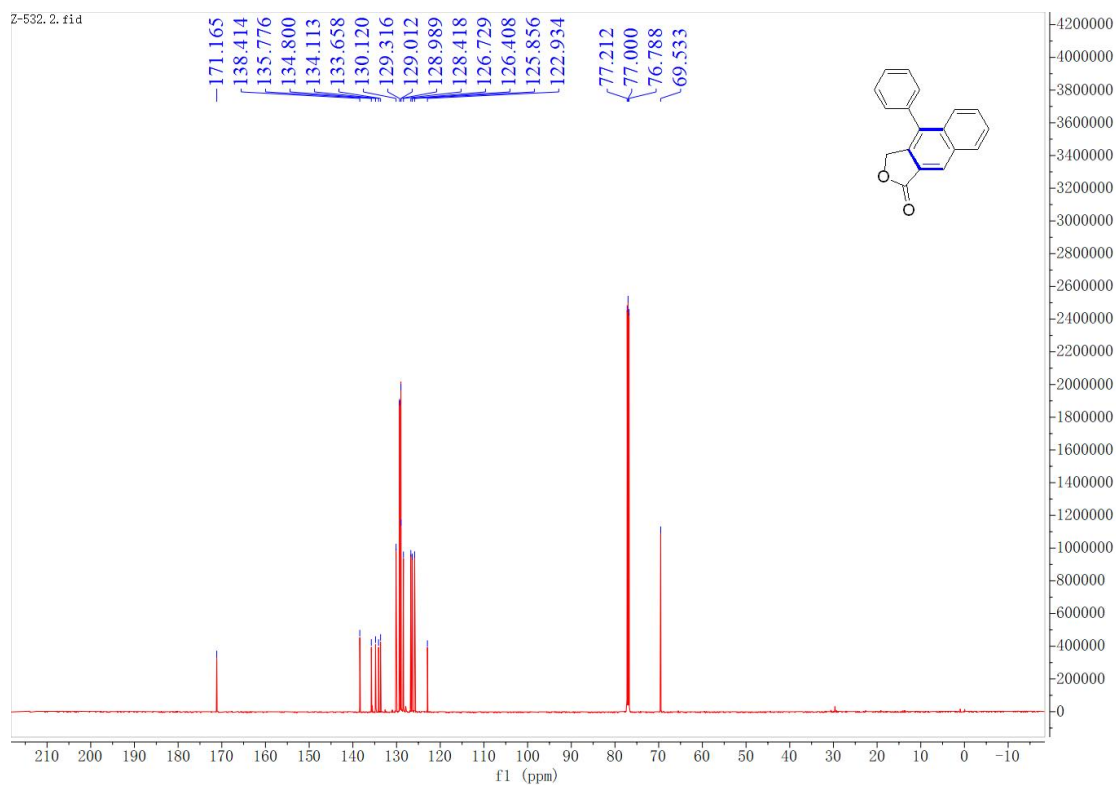

**34-<sup>1</sup>H NMR (600 MHz, CDCl<sub>3</sub>)**

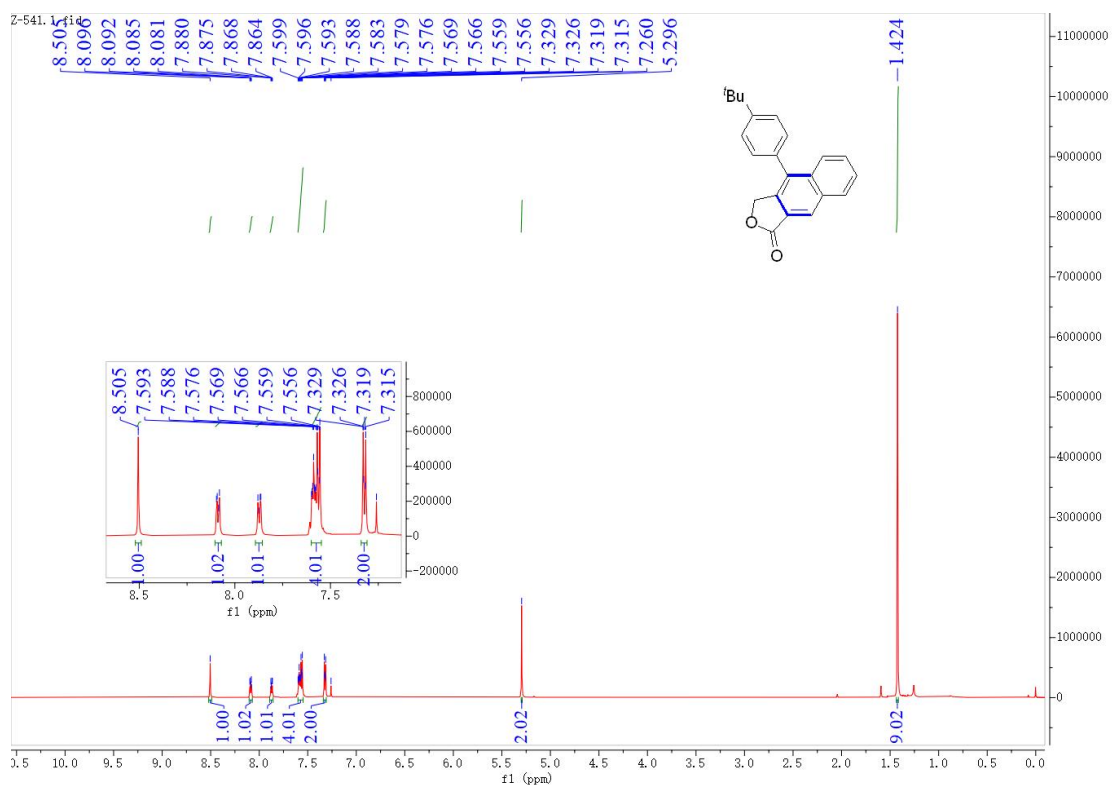

**34-<sup>13</sup>C {<sup>1</sup>H} NMR (150 MHz, CDCl<sub>3</sub>)**

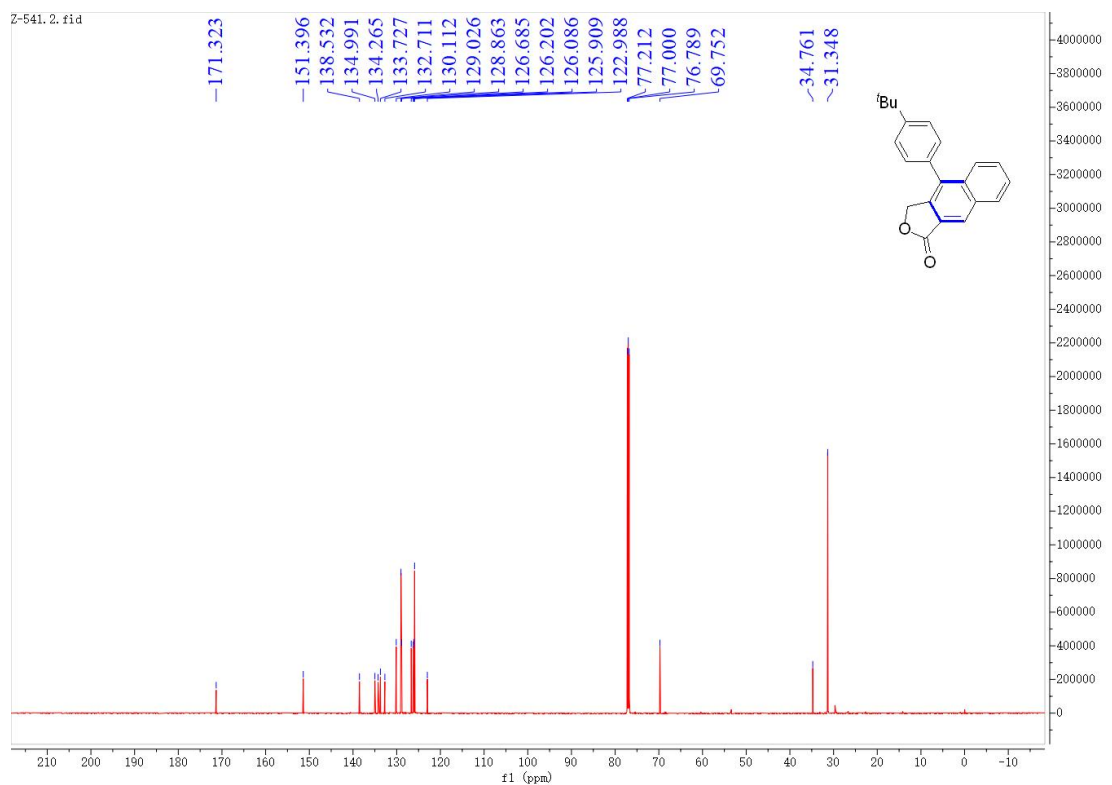



**35-<sup>1</sup>H NMR (600 MHz, CDCl<sub>3</sub>)**

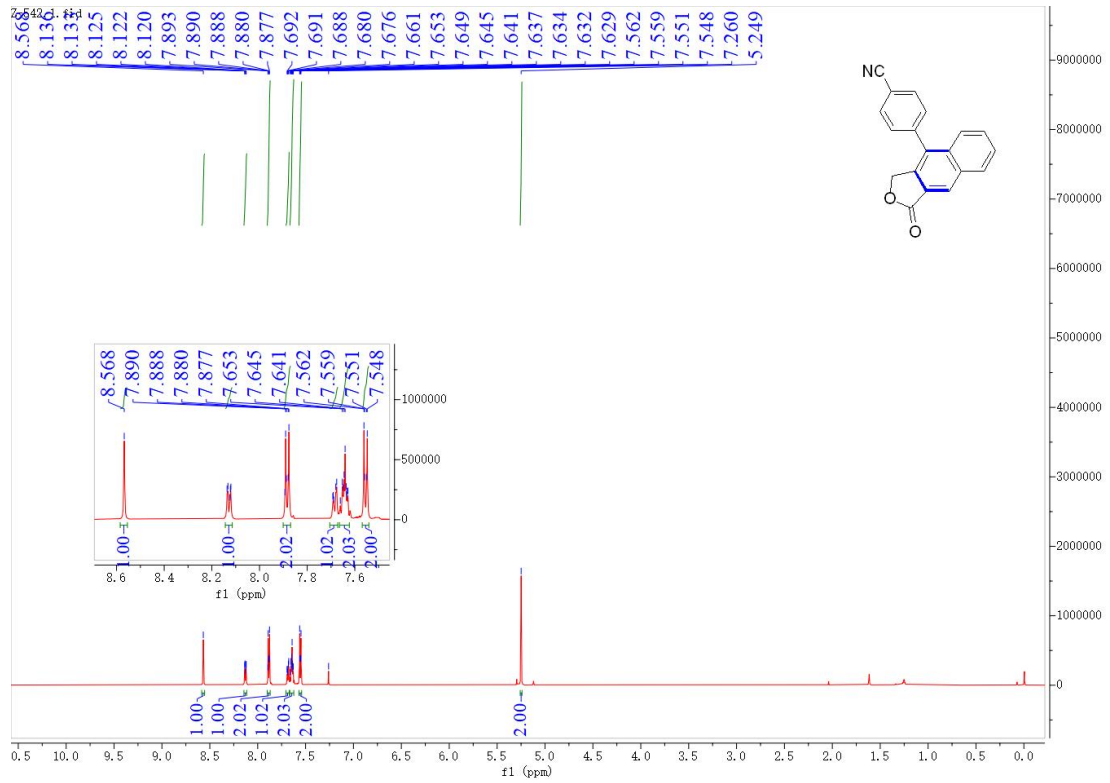

**35-<sup>13</sup>C {<sup>1</sup>H} NMR (150 MHz, CDCl<sub>3</sub>)**

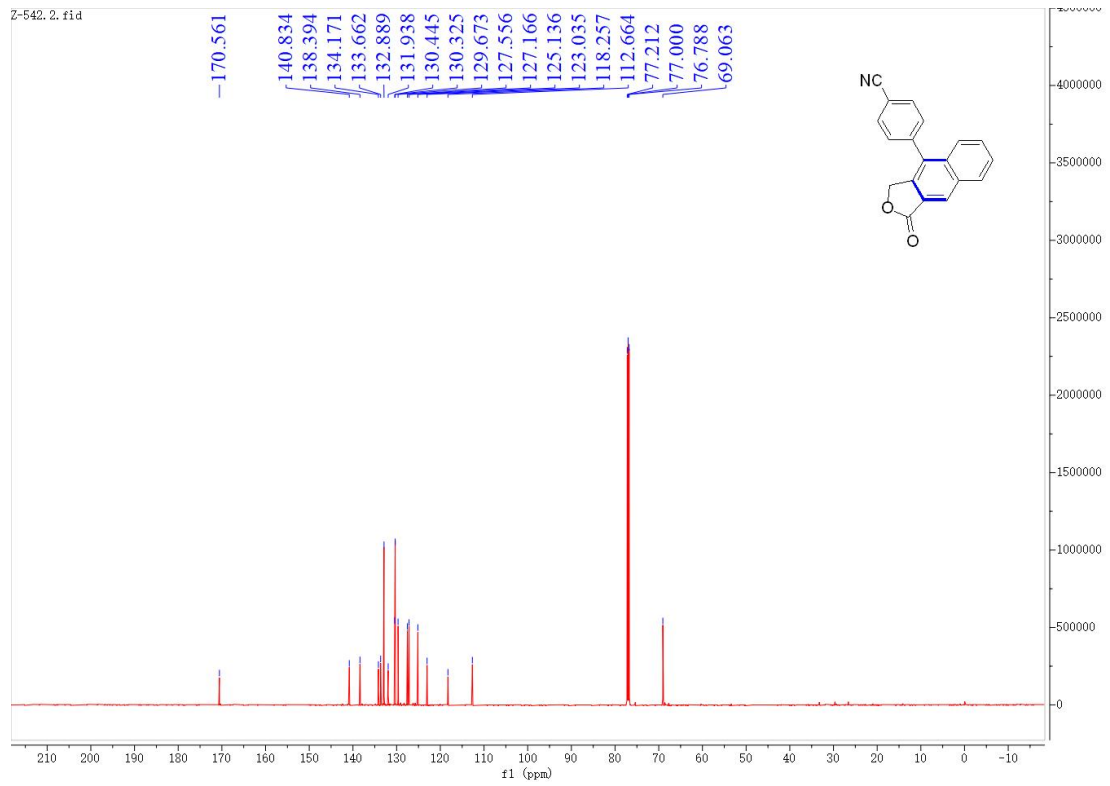

### 36-<sup>1</sup>H NMR (600 MHz, CDCl<sub>3</sub>)

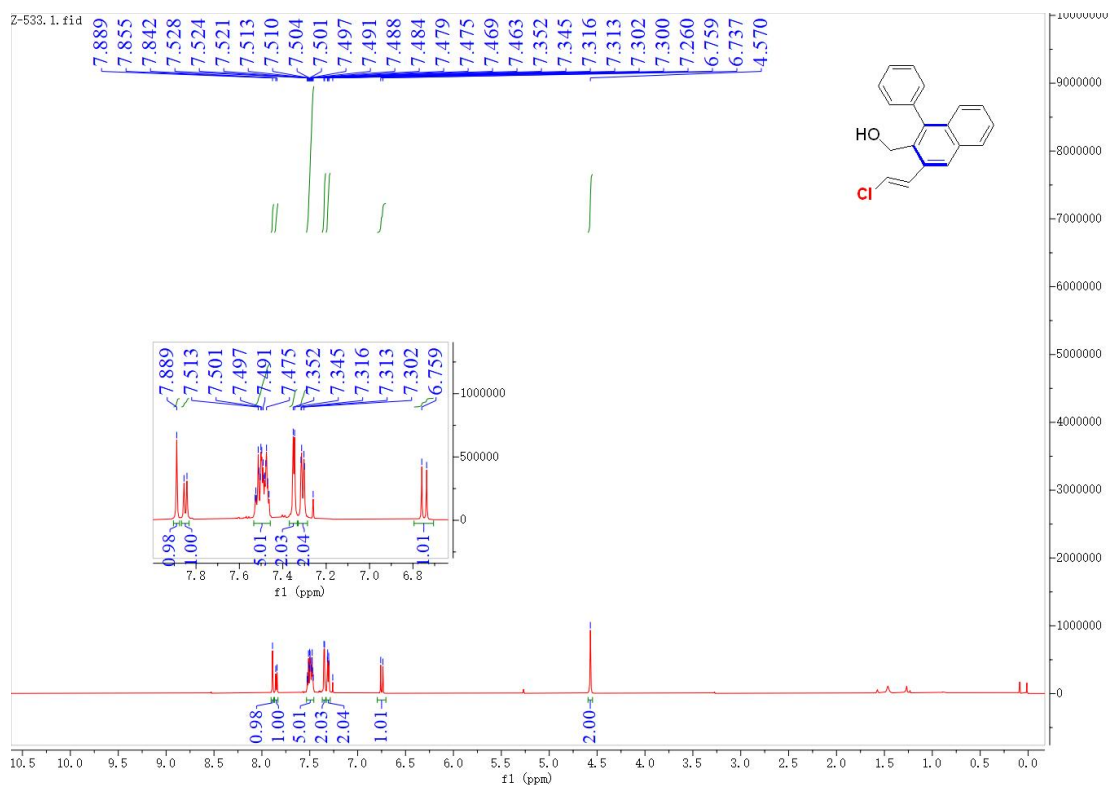

### 36-<sup>13</sup>C {<sup>1</sup>H} NMR (150 MHz, CDCl<sub>3</sub>)

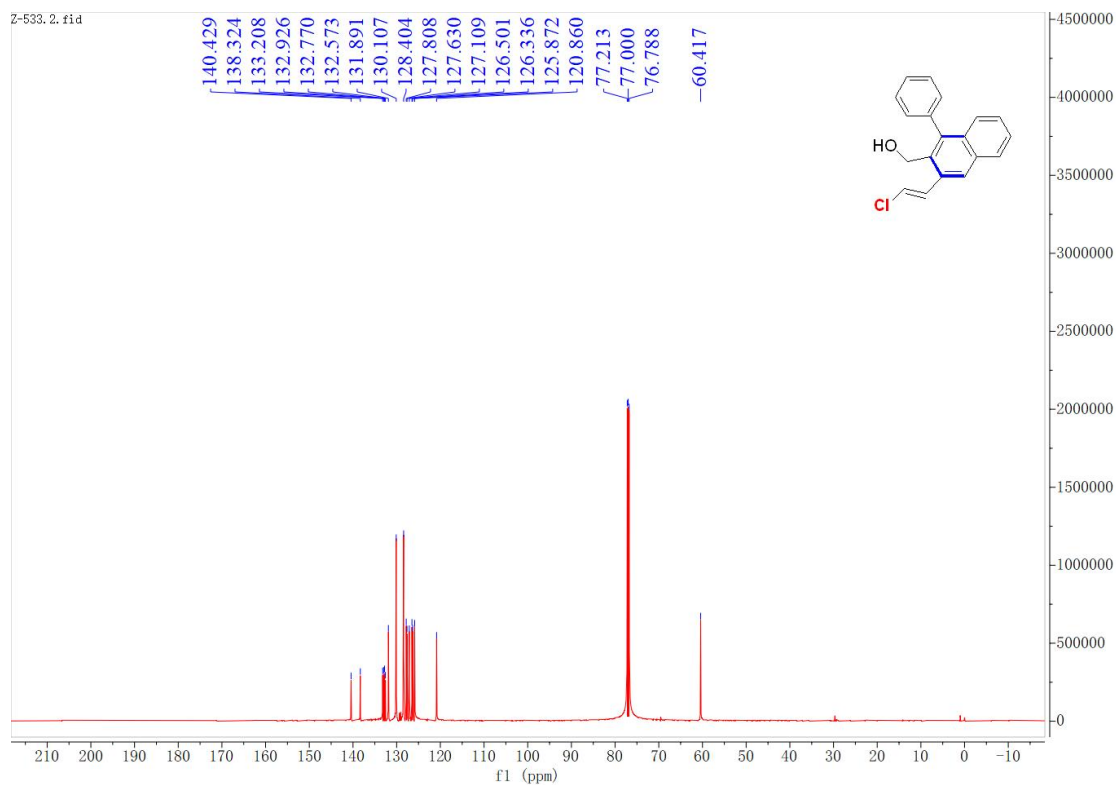

37-<sup>1</sup>H NMR (400 MHz, CDCl<sub>3</sub>)

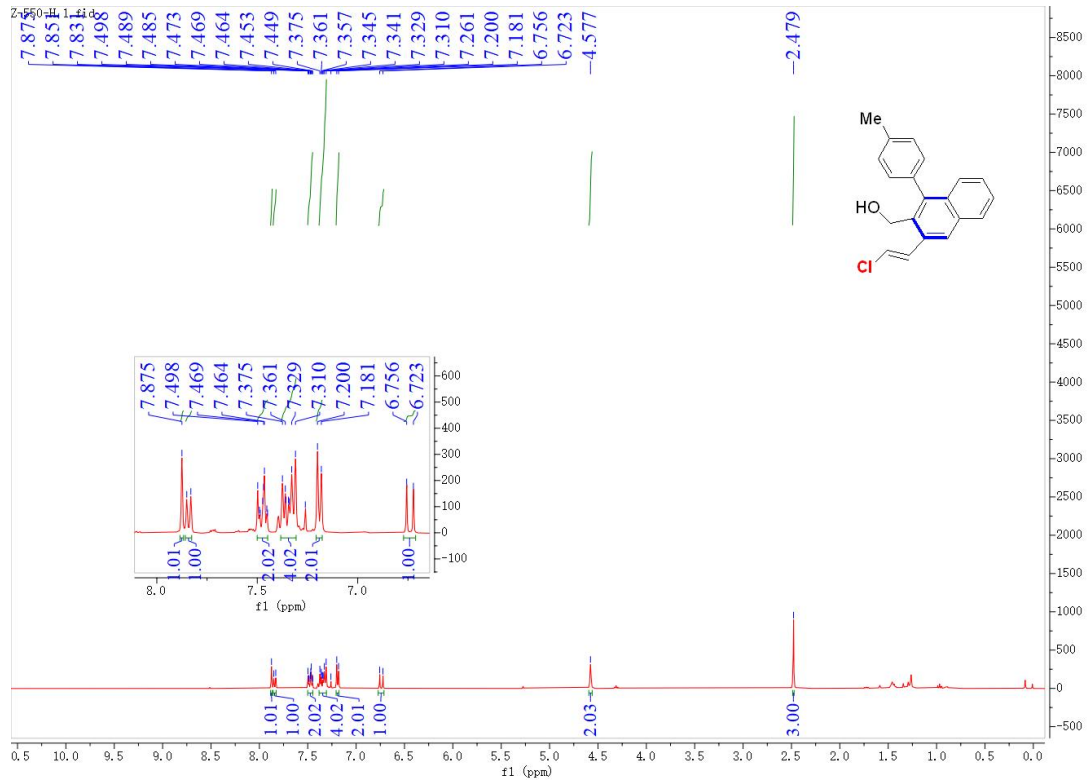

37-<sup>13</sup>C {<sup>1</sup>H} NMR (150 MHz, CDCl<sub>3</sub>)

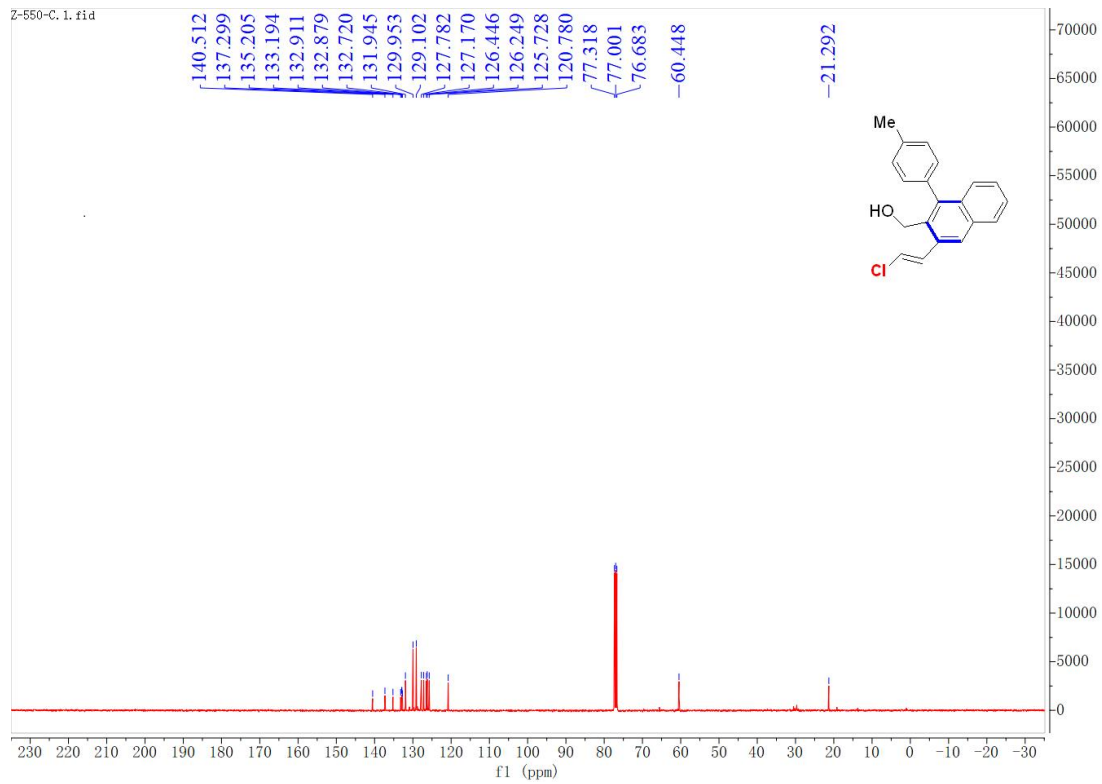

**38-<sup>1</sup>H NMR (600 MHz, CDCl<sub>3</sub>)**

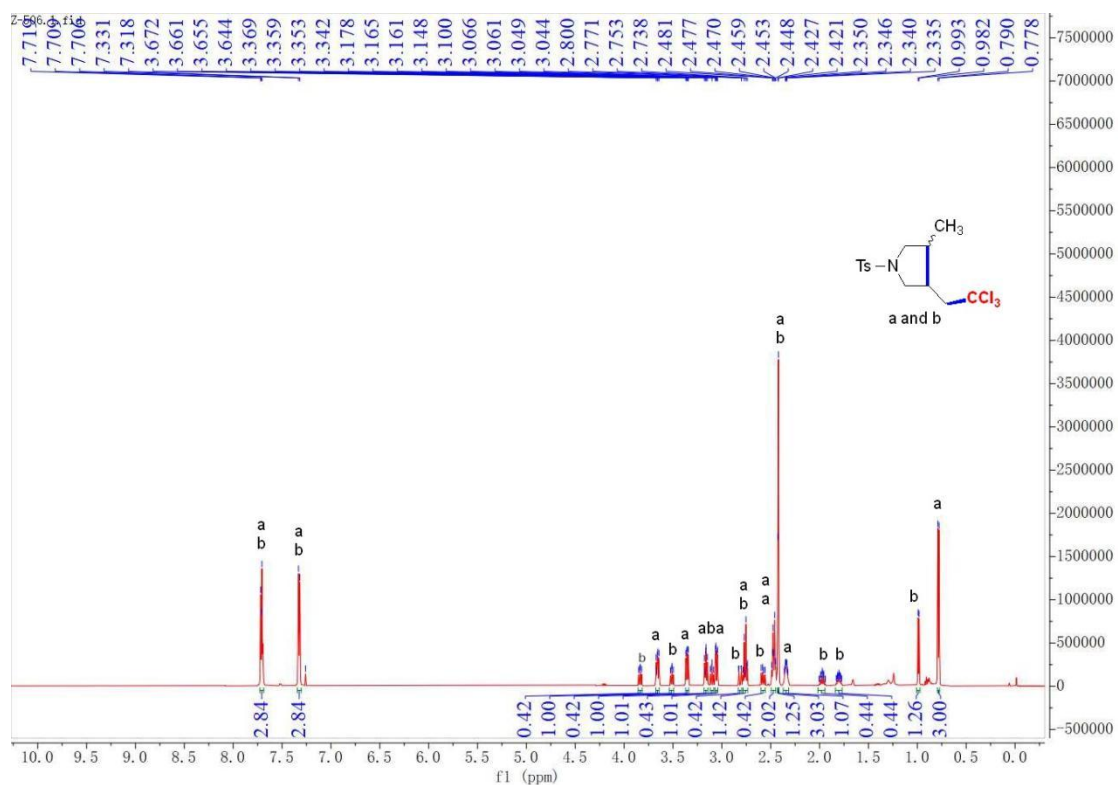

**38-<sup>13</sup>C {<sup>1</sup>H} NMR (150 MHz, CDCl<sub>3</sub>)**

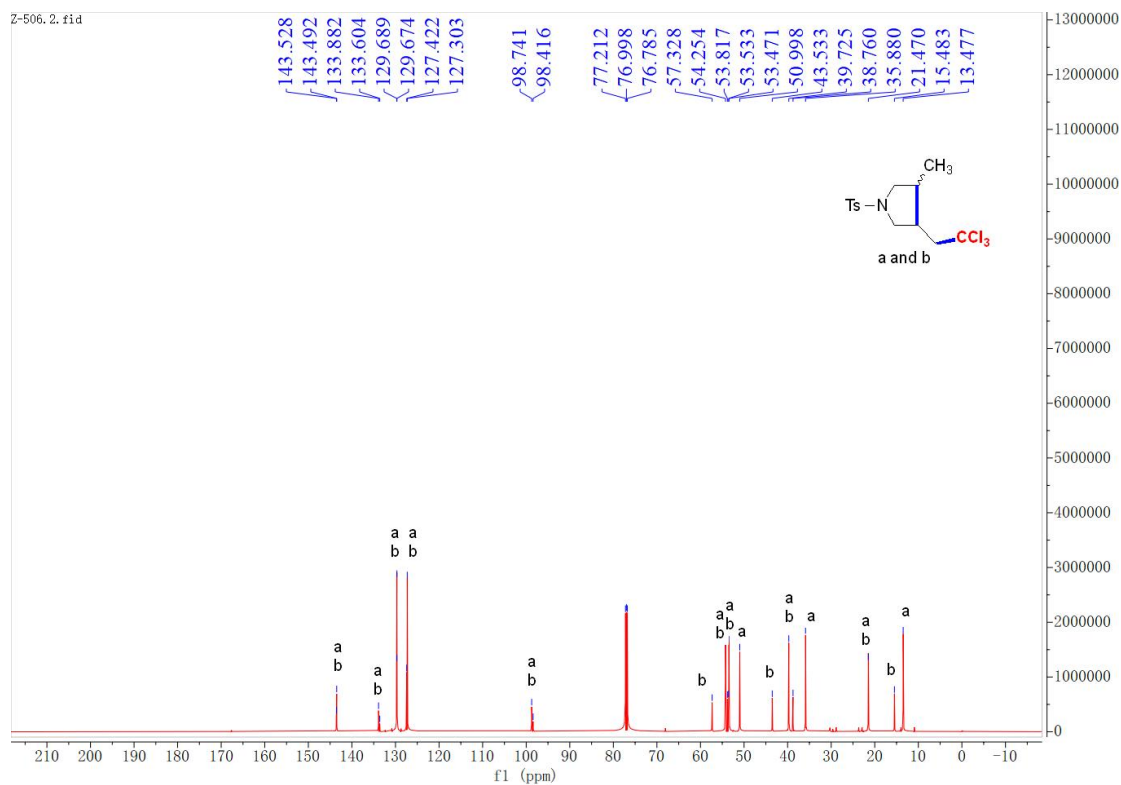

Supplement: d4cc00651h1.pdf [file d4cc00651h1.pdf]
